# Supplementary material for: Low composite functional movement screen score associated with decline of gait stability in young adults
Source: PeerJ. 2021 Apr 30;9:e11356. doi: 10.7717/peerj.11356 (PMC8092110; doi:10.7717/peerj.11356)
Supplement: File S1 [file peerj-09-11356-s001.xlsx]

## Sheet: Raw data (n = 439)
		Demographic characteristics															Gait variables: Preferred speed																		Gait variables: Faster speed
No	NameSubject	Age_years	Sex	TFMS_score	FMS_14_group	Height_cm	Body weight_kg	BMI	percent body fat_%	Insomnia severity index (ISI)_score	Vigorous PA_Mets/week	Moderate PA_Mets/week	Walking PA_Mets/week	Total PA_Mets/week	Stress response index modified form (SRI-MF)_score		Preferred speed_Cadence_beats/min	Preferred speed_Walking speed_m/s	Preferred speed_Stride_Length_m	Preferred speed_Step_Length_m	Preferred speed_Single_Support_phase_%	Preferred speed_Double_Support_phase_%	Preferred speed_Stance_phase_%	Preferred speed_PCI_%	Preferred speed_GA_%	Preferred speed_stride_time_mean_s	Preferred speed_step_time_mean_s	Preferred speed_CV_Stride_Length_%	Preferred speed_CV_Step_Length_%	Preferred speed_CV_Single_Support_phase_%	Preferred speed_CV_Double_Support_phase_%	Preferred speed_CV_Stance_phase_%	Preferred speed_CV_stride_time_%	Preferred speed_CV_step_time_%	Faster speed_Cadence_beats/min	Faster speed_Walking speed_m/s	Faster speed_Stride_Length_m	Faster speed_Step_Length_m	Faster speed_Single_Support_phase_%	Faster speed_Double_Support_phase_%	Faster speed_Stance_phase_%	Faster speed_PCI_%	Faster speed_GA_%	Faster speed_stride_time_s	Faster speed_step_time_s	Faster speed_CV_Stride_Length_%	Faster speed_CV_Step_Length_%	Faster speed_CV_Single_Support_phase_%	Faster speed_CV_Double_Support_phase_%
1	Participant_001	23	Female	18	TFMS>14	157	57	23.1247	29.6	13	1920	0	1584	3504	61		88	0.9444	1.2781	0.6396	37.1885	26.6025	63.791	3.8229	2.6693	1.35326	0.677209	2.55825	1.8278	5.9911	13.3705	4.31268	2.55844	2.69896	106	1.1389	1.2845	0.6419	37.9881	24.3137	62.3018	3.561	0.7659	1.12788	0.563654	2.69009	1.4415	5.06843	6.26601
2	Participant_002	20	Female	18	TFMS>14	160	47	18.3594	30	13	0	720	1188	1908	33		109	1.1389	1.2511	0.6251	39.3965	21.1564	60.5529	3.1909	0.1283	1.09852	0.548889	1.56111	0.8259	3.79704	8.67444	2.24151	1.56114	1.50466	112	1.3611	1.4539	0.7268	40.6809	18.7745	59.4553	2.9726	0.3353	1.06818	0.534	1.36063	0.6902	2.76592	5.78338
3	Participant_003	23	Female	15	TFMS>14	161	60	23.1473	35.9	15	240	480	297	1017	56		111	1.1389	1.2244	0.612	38.3054	22.6958	61.0012	2.6435	1.794	1.07509	0.537364	1.85922	0.8249	3.34287	7.86401	2.49487	1.85923	1.53513	117	1.3611	1.3935	0.6965	39.3735	20.5456	59.9192	2.1863	1.7805	1.02379	0.511724	1.58976	0.7963	2.54892	4.42479
4	Participant_004	28	Female	12	TFMS≤14	160	66	25.7812	37.9	5	720	0	1386	2106	35		104	1.1389	1.3091	0.654	38.7069	21.7673	60.4742	3.8737	2.0934	1.14941	0.574216	2.1199	1.1814	4.16799	6.06828	2.78582	2.11999	2.05748	112	1.3611	1.4423	0.721	40.4598	18.8058	59.2656	4.1192	0.7472	1.05964	0.529727	1.80823	1.0805	3.0927	5.35154
5	Participant_005	21	Male	13	TFMS≤14	169	62	21.7079	15.1	13	2400	600	693	3693	36		111	1.3333	1.4277	0.7135	39.8305	20.927	60.7575	8.4849	1.5025	1.07074	0.535093	1.30659	0.7038	2.3251	4.73551	1.71798	1.30667	1.31522	119	1.6111	1.6253	0.8128	42.1125	17.074	59.1865	3.0928	3.133	1.00879	0.504483	0.782602	0.57	2.69089	8.56683
6	Participant_006	25	Male	13	TFMS≤14	168	64	22.6757	18.2	12	1440	720	1188	3348	46		99	1.1389	1.3809	0.6901	38.8832	22.1821	61.0653	3.0221	0.1298	1.2125	0.605938	1.63656	1.0341	3.59873	7.82117	2.65241	1.63654	1.70659	106	1.3611	1.5323	0.7663	40.9293	18.4489	59.3782	2.6609	0.822	1.12577	0.562981	1.29599	0.742	2.23947	4.33305
7	Participant_007	21	Female	15	TFMS>14	165	79	29.0174	31.6	0	1200	0	247.5	1447.5	42		104	0.9444	1.0802	0.5402	37.305	24.0871	61.3921	5.7084	3.433	1.14373	0.571961	2.176	1.241	2.68945	9.45693	3.4638	2.17611	2.16966	116	1.1389	1.1721	0.586	40.1466	20.2182	60.3648	4.218	1.3017	1.02912	0.514561	1.57926	0.7963	2.51952	7.88547
8	Participant_008	20	Female	13	TFMS≤14	167	73	26.1752	33.8	3	0	0	462	462	40		102	1.1389	1.3389	0.6693	38.8568	22.1674	61.0242	2.5913	0.306	1.1756	0.5877	1.61542	0.873	2.26936	6.14641	1.98839	1.61539	1.48542	110	1.3611	1.4743	0.7378	40.4001	19.1657	59.5657	2.7663	0.0846	1.08315	0.542037	1.75735	1.0342	3.15742	6.18449
9	Participant_009	25	Male	17	TFMS>14	170	88	30.4498	23.7	11	0	0	396	396	36		110	1.2778	1.3833	0.6914	38.83	22.5624	61.3924	1.8919	0.5743	1.08259	0.541111	0.976663	0.55	1.98017	5.29952	1.62023	0.976676	1.01638	118	1.5278	1.5423	0.771	40.4441	19.0436	59.4876	2.1255	0.1688	1.00948	0.504655	0.99783	0.4812	1.90065	5.51996
10	Participant_010	21	Female	13	TFMS≤14	153	42.2	18.0273	24.4	4	0	0	693	693	28		115	1.25	1.2901	0.6452	41.2885	17.6101	58.8985	2.7673	0.4539	1.03211	0.51614	1.83067	1.0346	2.67459	7.06583	2.10328	1.83059	2.00444	126	1.6111	1.5233	0.7618	42.4429	15.3702	57.813	2.2915	0.6349	0.945484	0.472823	1.29783	0.5284	1.6104	5.05524
11	Participant_011	21	Female	14	TFMS≤14	156	85	34.9277	46.1	7	0	0	2376	2376	29		99	1.0556	1.2654	0.6325	39.1556	21.2802	60.4358	2.8597	1.0381	1.19878	0.599184	1.88154	1.1036	4.14091	5.46376	3.13705	1.88145	1.84175	110	1.2778	1.38	0.6899	39.8148	19.6845	59.4993	2.9195	1.6349	1.08	0.539907	1.55345	0.8579	2.94011	8.97051
12	Participant_012	21	Female	14	TFMS≤14	159	63.5	25.1177	32.2	6	0	0	247.5	247.5	38		114	1.0556	1.1004	0.55	39.4142	20.6235	60.0377	2.9166	1.4834	1.0425	0.521071	1.61391	0.7601	2.88779	9.02514	1.98525	1.61378	1.4588	122	1.2778	1.2539	0.6266	40.8118	18.1386	58.9504	3.1777	0.6124	0.981333	0.490417	1.19811	0.6144	2.29958	6.10631
13	Participant_013	19	Female	18	TFMS>14	166	61	22.1367	22.5	17	6160	4760	1386	12306	55		104	1	1.1431	0.5715	37.9588	23.8422	61.801	3.2203	0.6306	1.14314	0.571471	1.61115	0.9304	2.71479	7.55971	2.61938	1.61107	1.62807	111	1.1944	1.2854	0.6428	39.5801	20.7193	60.2994	2.1506	0.2984	1.07611	0.538148	1.40143	0.5552	2.59651	4.79312
14	Participant_014	25	Female	13	TFMS≤14	161	49	18.9036	24.8	3	0	320	198	518	46		90	0.9444	1.2604	0.6307	40.3099	19.9762	60.2861	2.9335	1.4897	1.33455	0.667841	1.34092	1.0574	4.21733	6.91223	2.24927	1.34094	1.58336	96	1.1389	1.4251	0.7122	40.9624	17.7691	58.7315	3.3573	0.7444	1.25128	0.625319	1.62879	1.0127	3.71658	6.16632
15	Participant_015	20	Male	16	TFMS>14	179	90	28.089	19.7	10	1440	720	990	3150	27		106	1.1389	1.2786	0.6392	38.986	22.7133	61.6992	2.6922	1.6961	1.12269	0.56125	1.18629	0.6114	2.69097	4.00382	1.8292	1.18625	1.08934	114	1.3611	1.4263	0.7132	39.1786	21.2509	60.4294	2.0878	1.0204	1.04786	0.524018	1.09275	0.5624	1.83161	5.44495
16	Participant_016	21	Male	13	TFMS≤14	179	77	24.0317	20.7	20	1920	0	660	2580	53		93	0.9444	1.2044	0.6026	37.5384	24.2073	61.7457	4.852	1.8894	1.27522	0.638043	2.96446	1.8162	6.49229	9.01794	4.68454	2.96467	2.84656	102	1.1389	1.3402	0.67	38.7492	21.6179	60.3671	4.0774	2.2551	1.1768	0.5883	2.13257	1.3176	5.00423	7.3527
17	Participant_017	22	Female	18	TFMS>14	151	56	24.5603	36.1	5	480	240	462	1182	48		100	0.9444	1.1351	0.5676	37.7144	25.2335	62.9479	2.3082	1.7716	1.20184	0.60102	2.61305	1.5907	4.74275	7.69572	3.50925	2.61328	2.6467	108	1.1389	1.2556	0.628	38.6788	22.5398	61.2186	2.5347	0.2169	1.10245	0.551415	1.73456	0.9335	2.93261	7.48365
18	Participant_018	21	Female	14	TFMS≤14	162	80	30.4832	41	2	0	600	495	1095	44		94	0.8889	1.1316	0.5656	37.2609	26.1783	63.4392	5.2159	1.8969	1.27304	0.636304	2.97934	1.9038	6.39652	14.5361	4.87727	2.97936	2.9919	102	1.0556	1.2297	0.615	38.0086	25.1674	63.176	3.8526	3.1661	1.165	0.5826	2.03317	1.2619	4.82391	4.00836
19	Participant_019	20	Male	14	TFMS≤14	168	63	22.3214	20.2	12	960	140	132	1232	33		104	1.1667	1.3344	0.6671	40.0651	20.0754	60.1406	2.5253	0.5148	1.14373	0.571765	1.75687	1.1195	3.41394	5.30849	2.78065	1.75688	1.95788	111	1.3889	1.495	0.7479	41.4865	17.3311	58.8176	2.7919	0.7356	1.07636	0.538455	1.48608	0.7913	3.09088	5.6338
20	Participant_020	20	Male	13	TFMS≤14	176	60.9	19.6604	16.2	13	2400	360	2079	4839	67		110	1.3333	1.4516	0.7256	40.1769	19.0509	59.2278	2.4526	1.4709	1.0887	0.544167	1.2995	0.6067	2.80061	6.48316	2.04836	1.29955	1.11487	114	1.6111	1.6819	0.8408	41.3958	17.1399	58.5358	2.3593	0.2028	1.04393	0.521875	1.263	0.6719	2.26955	7.03213
21	Participant_021	23	Female	12	TFMS≤14	169	56	19.6072	35.4	7	0	0	693	693	57		95	1.0556	1.3295	0.664	38.5916	22.2299	60.8215	3.657	1.4326	1.25957	0.629022	3.3275	2.0017	6.60584	6.9564	4.42344	3.32721	3.18221	107	1.2778	1.4213	0.7102	39.2289	20.5567	59.7856	2.808	2.3902	1.11231	0.555769	1.81201	1.1282	3.53617	6.1109
22	Participant_022	22	Female	16	TFMS>14	148	46	21.0007	28.1	2	0	0	462	462	23		90	0.8333	1.0972	0.5481	38.6674	23.8564	62.5237	2.6755	3.1288	1.31659	0.657727	2.02204	1.3248	3.56554	6.40206	3.63718	2.02219	2.01426	103	1	1.1537	0.577	39.7349	22.2298	61.9646	4.2834	4.3713	1.15373	0.576961	3.92901	2.2142	5.84121	5.40581
23	Participant_023	20	Female	16	TFMS>14	152	53	22.9398	36.6	3	0	0	495	495	42		99	1	1.2104	0.6052	38.2616	21.79	60.0516	4.1587	4.2688	1.21042	0.605208	1.01124	0.6919	2.14445	5.82194	1.83542	1.01125	1.14325	106	1.1944	1.3431	0.6715	39.5245	19.463	58.9875	3.1247	3.6955	1.12442	0.562212	1.35554	0.787	2.45164	7.71721
24	Participant_024	20	Female	16	TFMS>14	156	68	27.9421	36.5	7	1200	960	594	2754	38		112	1.25	1.3311	0.6659	40.3107	19.6346	59.9454	2.4936	0.6374	1.06491	0.532727	1.4534	0.791	2.21157	7.66402	2.03101	1.45336	1.48474	119	1.5	1.5092	0.7546	41.4926	17.3854	58.878	2.3916	0.8972	1.0061	0.503051	1.08286	0.5448	2.01361	6.5601
25	Participant_025	27	Male	10	TFMS≤14	175	62	20.2449	19.9	12	1440	120	594	2154	43		99	1.1944	1.454	0.7264	41.3486	19.5105	60.8591	5.0023	5.5014	1.21729	0.608125	2.22287	1.2274	2.67361	6.40681	3.08927	2.22298	2.01834	108	1.4444	1.593	0.7965	42.053	17.6219	59.6749	3.2328	4.1958	1.10283	0.551415	2.01119	1.0789	3.67298	11.8478
26	Participant_026	24	Female	15	TFMS>14	156	47	19.313	26.9	9	0	0	1386	1386	47		108	1.2778	1.4031	0.7019	40.9794	18.677	59.6564	9.7495	1.5635	1.09811	0.54934	2.1671	1.2133	2.72308	8.03127	2.63777	2.167	2.20861	117	1.5278	1.5699	0.7852	42.4791	15.3492	57.8282	3.0473	0.7261	1.02754	0.513947	1.54979	0.7877	1.99604	7.32416
27	Participant_027	25	Male	17	TFMS>14	172	68	22.9854	22.4	8	0	0	495	495	27		105	1.25	1.4224	0.7109	39.7161	21.5143	61.2304	3.4699	2.4118	1.13788	0.56875	1.23488	0.7524	2.70646	5.50657	1.85986	1.23489	1.3229	107	1.5	1.6673	0.8338	40.6892	18.8763	59.5654	2.3479	0.6277	1.11151	0.555849	1.16452	0.5806	2.22098	7.09196
28	Participant_028	22	Female	15	TFMS>14	163	65	24.4646	30.4	8	480	180	297	957	67		101	1.0556	1.2399	0.6197	40.3201	20.3644	60.6845	3.1429	2.5231	1.1746	0.5871	2.20178	1.2413	3.499	7.96881	3.32919	2.20176	2.11434	108	1.2778	1.4111	0.7049	40.7996	18.3154	59.115	3.4113	0.2462	1.10434	0.551698	1.50817	0.7887	2.87307	6.84451
29	Participant_029	24	Male	11	TFMS≤14	173	86	28.7347	40.4	6	0	0	594	594	50		102	1.1111	1.304	0.6518	37.5085	24.6251	62.1336	2.4909	0.9496	1.1736	0.5866	1.57812	0.9189	2.89561	5.81439	2.20299	1.57816	1.56651	108	1.3333	1.4747	0.7374	39.1334	21.4773	60.6107	3.5098	0.6518	1.10604	0.553019	0.901404	0.5171	1.88228	4.51407
30	Participant_030	24	Male	9	TFMS≤14	170	66.8	23.1142	21	7	2400	0	297	2697	23		109	1.3333	1.4573	0.7286	38.8682	20.5185	59.3866	4.8321	4.3921	1.09296	0.546481	0.958461	0.6847	2.70015	5.1032	1.49444	0.958471	1.2529	118	1.6111	1.6206	0.8107	40.2125	18.2893	58.5019	3.5359	3.053	1.00586	0.50319	1.1534	0.4707	2.02201	5.73833
31	Participant_031	27	Male	13	TFMS≤14	176	72	23.2438	27.1	9	0	0	792	792	47		109	1.25	1.3685	0.6841	40.0541	20.0271	60.0812	3.2352	0.3384	1.09481	0.547315	2.42775	1.3393	4.2545	6.43578	3.35446	2.42774	2.44698	116	1.5	1.5503	0.7753	41.0796	17.8747	58.9543	3.1625	0.0827	1.03351	0.516842	2.17855	0.9717	2.88635	8.45553
32	Participant_032	25	Male	12	TFMS≤14	174	76	25.1024	28.8	14	0	0	1386	1386	51		114	1.3889	1.4631	0.7316	40.6849	19.9695	60.6543	3.159	3.3471	1.05339	0.526786	1.24651	0.6776	1.93929	7.44936	1.9626	1.24653	1.28635	123	1.6667	1.6145	0.8074	41.9699	17.3464	59.3163	2.7706	3.1125	0.968689	0.484426	1.12896	0.5209	1.77294	6.83081
33	Participant_033	27	Male	14	TFMS≤14	173	70	23.3887	24.4	3	0	0	990	990	54		103	1.0833	1.2569	0.6284	38.9049	22.5452	61.4501	2.6771	0.9164	1.1602	0.580098	1.45322	0.7105	2.88036	4.59566	2.02018	1.45324	1.22479	108	1.3056	1.4408	0.72	40.0239	20.0205	60.0445	2.3924	0.1679	1.10358	0.551509	1.27053	0.6338	2.46228	6.30803
34	Participant_034	27	Female	15	TFMS>14	161	71	27.3909	37.7	9	240	80	792	1112	42		85	0.8611	1.2119	0.6053	36.6724	26.9671	63.6395	3.4657	0.8543	1.40732	0.702927	2.16899	1.4524	5.34898	6.89878	3.72253	2.16907	2.06622	95	1.0278	1.2808	0.6401	37.357	24.8933	62.2503	2.2571	1.0457	1.24617	0.622766	1.2114	0.7057	2.26383	5.2729
35	Participant_035	23	Female	12	TFMS≤14	162	55.2	21.0334	32.6	4	480	720	495	1695	40		92	0.8333	1.0696	0.5345	36.4958	26.7486	63.2445	3.7865	0.7091	1.28356	0.641444	2.38662	1.3065	4.69122	9.93809	3.46876	2.38667	2.0368	105	1	1.136	0.5679	38.1581	23.7176	61.8757	3.3825	0.0888	1.13596	0.567885	1.91664	0.9164	3.16342	6.58456
36	Participant_036	22	Female	14	TFMS≤14	162	55	20.9572	29.3	11	0	0	198	198	55		104	1.1389	1.2986	0.6494	38.951	21.8401	60.7911	3.409	0.7772	1.1402	0.570196	1.83385	0.9598	3.81069	5.45968	2.51254	1.83386	1.68325	111	1.3611	1.4623	0.7309	40.3114	19.5803	59.8917	2.4844	0.5051	1.07436	0.537	1.14711	0.5527	2.21228	6.9524
37	Participant_037	25	Male	17	TFMS>14	179	77	24.0317	15.7	14	0	720	1386	2106	29		104	1.2222	1.408	0.7041	39.6766	21.4298	61.1064	2.3672	1.9931	1.15196	0.576078	1.29807	0.842	2.5103	5.95246	2.02581	1.29809	1.4616	109	1.4722	1.6197	0.8097	41.0705	18.5827	59.6533	1.8725	1.778	1.10019	0.55	1.1927	0.7265	2.09956	6.52273
38	Participant_038	25	Female	11	TFMS≤14	160	53	20.7031	30.3	14	240	360	99	699	50		94	0.8333	1.062	0.5311	37.0522	24.6844	61.7366	4.2809	3.2166	1.27435	0.637283	2.97509	1.8758	5.92677	10.7084	4.60699	2.97531	2.9434	99	1	1.2022	0.6014	38.7201	22.0336	60.7537	4.9631	1.3499	1.20224	0.601429	1.97604	1.5186	3.94136	10.6188
39	Participant_039	26	Female	13	TFMS≤14	158	52	20.83	28.2	10	960	240	1188	2388	43		104	1.1389	1.3095	0.6549	38.5573	22.7149	61.2722	2.0465	0.4413	1.1498	0.575	1.40443	0.6716	2.44519	4.98131	1.9743	1.40438	1.16791	113	1.3611	1.4408	0.7204	39.7942	19.8212	59.6154	2.2548	1.4728	1.05857	0.529286	0.984833	0.5212	1.96159	5.59956
40	Participant_040	23	Male	12	TFMS≤14	171	78.7	26.9143	27.6	0	1920	720	2376	5016	30		101	1.0833	1.2818	0.6409	37.7113	24.9662	62.6775	2.4354	1.0363	1.1832	0.5916	1.07493	0.6741	2.99486	4.02224	1.60696	1.07492	1.13944	105	1.3056	1.4745	0.7371	38.8217	22.3055	61.1272	3.1731	0.1315	1.12942	0.564615	0.941767	0.5267	2.44296	5.96579
41	Participant_041	25	Female	15	TFMS>14	162	50	19.052	27.7	2	720	360	1386	2466	27		96	0.6667	0.826	0.4132	39.9279	23.0981	63.0259	4.6751	7.6858	1.23894	0.619787	3.9374	2.8038	9.43977	10.3208	5.42602	3.93743	4.5238	102	0.8056	0.9412	0.4705	40.089	22.1671	62.2561	5.276	6.0278	1.1684	0.5841	2.79906	1.7683	6.27803	7.50797
42	Participant_042	23	Female	12	TFMS≤14	158	59.2	23.7141	20.2	11	0	0	495	495	39		110	0.9444	1.0261	0.5129	37.6342	24.0498	61.684	3.6685	1.7954	1.08648	0.543056	1.58581	0.8789	2.53971	7.29237	2.40646	1.58587	1.61834	116	1.1389	1.1701	0.5848	39.0881	21.2773	60.3654	2.8708	1.3883	1.02737	0.513509	1.45319	0.8109	2.237	6.55487
43	Participant_043	21	Female	17	TFMS>14	159	54	21.3599	27.1	2	0	0	495	495	50		111	1.1389	1.2186	0.6091	38.6746	22.243	60.9176	2.5403	1.049	1.07	0.534818	1.49115	0.8526	2.67773	3.47165	1.90651	1.49107	1.5942	117	1.3611	1.3966	0.698	40.1445	19.1228	59.2674	2.6404	1.4544	1.02603	0.512845	1.158	0.558	2.19208	4.10034
44	Participant_044	24	Female	12	TFMS≤14	165	52.1	19.1368	23.1	17	0	480	594	1074	58		110	1.3333	1.4435	0.7217	41.5327	17.8926	59.4252	2.4055	2.4551	1.08259	0.541296	1.24666	0.6748	2.61962	5.82196	1.74404	1.24672	1.24672	119	1.6111	1.6155	0.8076	42.3766	15.6356	58.0122	2.4018	0.9217	1.00271	0.501271	0.968655	0.5174	2.47212	7.85003
45	Participant_045	25	Male	15	TFMS>14	174	79.3	26.1924	22	5	0	240	2970	3210	35		117	1.6111	1.6403	0.8197	40.6266	19.6444	60.271	1.9055	2.234	1.0181	0.508793	0.972966	0.5195	1.92288	5.82711	1.29615	0.972981	1.02111	127	1.9444	1.8259	0.913	42.14	16.4469	58.5869	2.8053	1.7399	0.939048	0.469524	1.14967	0.5324	1.67608	4.30294
46	Participant_046	22	Female	10	TFMS≤14	160	57	22.2656	33.5	5	0	0	297	297	45		108	1.1944	1.3207	0.6606	40.6826	20.5802	61.2628	2.5272	4.9	1.10566	0.553019	1.48561	0.8867	2.88453	4.71084	1.74119	1.48572	1.60337	117	1.3611	1.3806	0.6902	41.4924	18.46	59.9524	3.6711	3.5443	1.01431	0.507069	2.38779	1.1182	3.88312	10.4924
47	Participant_047	23	Female	13	TFMS≤14	161	67.6	26.0792	36.7	5	0	720	990	1710	40		107	1.0833	1.2148	0.6074	39.17	22.3975	61.5675	3.3379	1.9081	1.12135	0.560673	1.51482	0.766	3.03932	5.58277	2.25151	1.51491	1.36628	112	1.3056	1.3858	0.6929	40.9215	19.0819	60.0034	2.9914	2.2863	1.06145	0.530727	1.15618	0.5171	2.36526	4.49326
48	Participant_048	26	Male	14	TFMS≤14	172	73	24.6755	18	13	0	600	1386	1986	51		102	1.1111	1.3082	0.6541	38.7124	21.7938	60.5062	3.8225	1.9983	1.1774	0.5887	1.95763	1.0715	3.54512	9.11314	3.2481	1.95758	1.8201	107	1.3333	1.483	0.7415	40.0509	18.7108	58.7617	4.1813	2.9217	1.11226	0.556132	1.46789	0.9399	3.54998	10.1754
49	Participant_049	20	Male	15	TFMS>14	173	67	22.3863	22	4	0	0	792	792	33		107	1.2778	1.4222	0.7112	41.3799	16.1553	57.5352	2.9324	2.5881	1.11302	0.556604	1.72416	0.9203	2.79363	9.27436	2.05266	1.72411	1.65339	114	1.5278	1.6061	0.8033	42.9251	14.3367	57.2618	2.5251	0.4362	1.05125	0.525804	1.41622	0.7605	2.0205	6.43872
50	Participant_050	20	Male	14	TFMS≤14	170	58	20.0692	14.2	5	960	600	594	2154	24		109	1.3333	1.4605	0.7301	41.0651	18.377	59.4421	2.0235	1.2428	1.09537	0.547593	1.33467	0.7248	2.45732	4.91702	1.93348	1.33474	1.32366	117	1.6111	1.635	0.8178	42.5246	15.6473	58.1719	2.0887	1.6516	1.01483	0.507586	1.38436	0.7025	2.26081	7.60642
51	Participant_051	24	Female	14	TFMS≤14	157	46	18.662	27.9	2	0	0	2970	2970	33		105	1.0556	1.1987	0.5992	37.0533	25.1651	62.2185	3.5183	1.9462	1.13558	0.567692	1.51951	1.0582	3.62262	4.76255	1.9401	1.51951	1.86407	112	1.2778	1.3621	0.6809	38.6833	22.1388	60.8221	2.9804	1.2706	1.066	0.532909	1.23418	0.7242	2.51194	6.00484
52	Participant_052	26	Male	18	TFMS>14	165	51	18.7328	12.5	11	0	720	1386	2106	25		90	1.2778	1.6826	0.841	40.0759	18.8989	58.9748	4.2409	2.341	1.31682	0.658182	1.49947	1.1032	3.71869	6.40302	2.77542	1.49947	1.67606	95	1.5278	1.9267	0.9635	42.9064	13.9459	56.8523	3.8613	0.6272	1.26109	0.630652	1.33543	1.0087	3.83369	12.4718
53	Participant_053	20	Female	12	TFMS≤14	168	55	19.487	27.4	11	0	120	495	615	43		107	1.0833	1.2035	0.6022	38.3492	23.5394	61.8886	3.4537	0.6219	1.11094	0.555849	1.624	0.8993	3.25691	7.75891	2.40901	1.62406	1.61797	113	1.3056	1.3774	0.6887	39.8781	20.5146	60.3927	2.666	0.6814	1.055	0.5275	1.25394	0.7792	3.13831	9.59268
54	Participant_054	23	Male	13	TFMS≤14	170	70	24.2215	23.5	5	0	0	990	990	25		114	1.2222	1.2783	0.6392	38.4839	24.1079	62.5918	2.3877	2.8348	1.04589	0.522946	1.11053	0.6599	2.36774	3.73612	1.56778	1.11058	1.26195	121	1.4722	1.4524	0.7259	39.8716	21.2536	61.1252	1.5389	2.5318	0.9865	0.493083	1.02752	0.5634	1.97835	5.07961
55	Participant_055	23	Male	15	TFMS>14	181	61	18.6197	15.4	10	240	120	396	756	34		109	1.25	1.3715	0.6854	38.1266	23.865	61.9916	2.5551	0.3104	1.09722	0.548333	4.22211	2.357	5.09172	6.65368	4.99116	4.22202	4.29852	115	1.5	1.5653	0.7828	40.0303	19.9059	59.9361	2.7473	0.084	1.04351	0.521842	2.05053	1.0664	2.99698	5.48832
56	Participant_056	26	Male	15	TFMS>14	171	60.2	20.5875	13.4	2	0	720	594	1314	31		109	1.1389	1.253	0.6264	39.8249	18.4649	58.2899	4.6243	4.6251	1.10019	0.55	1.75352	1.0758	5.36097	14.2839	3.31876	1.75353	1.95605	114	1.3611	1.4233	0.7117	41.1714	17.3668	58.5383	2.7343	0.812	1.04571	0.522857	1.49967	0.8704	3.16093	6.50897
57	Participant_057	25	Male	17	TFMS>14	168	54	19.1327	12.7	7	0	0	297	297	38		112	1.1944	1.2718	0.636	41.1373	17.9474	59.0847	2.898	0.5411	1.06473	0.532455	1.46431	0.797	3.15772	5.9797	2.21902	1.4644	1.49684	120	1.4444	1.43	0.715	41.7052	16.1616	57.8668	2.5625	0.9239	0.99	0.495	1.06835	0.4957	2.07312	7.72634
58	Participant_058	23	Male	12	TFMS≤14	174	65	21.4692	15.9	5	240	240	693	1173	39		105	0.9444	1.0705	0.5356	39.3112	22.5823	61.8935	3.79	3.1122	1.13346	0.567115	1.81364	0.9774	3.05155	6.09504	2.20411	1.81374	1.72341	114	1.1389	1.2003	0.6003	40.2745	20.9759	61.2504	3.3504	3.8598	1.05393	0.527054	1.2891	0.6107	2.14627	5.22838
59	Participant_059	23	Male	13	TFMS≤14	169	66	23.1084	19.3	0	1680	0	1386	3066	26		116	1.3333	1.3647	0.6821	40.9325	17.7408	58.6733	2.9746	0.9009	1.02351	0.511579	1.23433	0.7204	2.45086	5.76299	1.64095	1.23438	1.40812	123	1.6111	1.5646	0.7824	41.1209	17.0831	58.2039	2.9116	1.6287	0.971148	0.485656	1.03981	0.5542	1.86134	6.03111
60	Participant_060	23	Male	17	TFMS>14	171	69.2	23.6654	21.5	8	240	120	990	1350	50		102	1.1389	1.3377	0.6692	38.4301	23.7528	62.1829	3.5889	1.6079	1.1746	0.5876	1.95793	1.32	4.41633	6.2018	3.10101	1.95782	2.24643	113	1.3611	1.434	0.7165	40.3051	19.9831	60.2881	2.333	1.4828	1.05357	0.526429	1.70574	0.9	2.14687	7.1035
61	Participant_061	25	Male	14	TFMS≤14	177	76	24.2587	22.7	13	0	0	1386	1386	34		104	1.1667	1.3376	0.669	37.0617	26.0646	63.1264	3.3314	0.5089	1.14647	0.573431	1.23142	0.7309	2.74407	3.36779	1.80099	1.2314	1.27461	113	1.3889	1.4773	0.7385	38.2735	23.7094	61.9829	2.323	0.6601	1.06364	0.531727	0.866546	0.4882	1.77355	2.86511
62	Participant_062	25	Male	11	TFMS≤14	179	85.9	26.8094	14.2	10	0	0	396	396	37		116	1.3889	1.4276	0.7138	39.307	21.0275	60.3345	3.4078	0.9773	1.02789	0.513947	1.10462	0.6123	2.2281	5.95934	1.76963	1.10454	1.19133	125	1.6667	1.5879	0.7941	40.816	17.9617	58.7777	3.9899	0.9905	0.952742	0.476452	0.945817	0.4435	1.76597	6.41086
63	Participant_063	23	Female	12	TFMS≤14	166	51.1	18.5441	32	3	0	0	495	495	60		106	1.0556	1.1851	0.5926	37.3758	25.3683	62.7441	4.0707	0.3213	1.12269	0.561442	2.35089	1.1238	5.24618	7.51489	3.37243	2.35088	2.00158	112	1.2778	1.3612	0.6805	39.6825	20.6179	60.3004	3.7768	0.0423	1.06527	0.532545	2.07103	1.0697	4.09047	6.66702
64	Participant_064	25	Male	16	TFMS>14	179	73	22.7833	22.3	20	0	0	594	594	36		104	1.2778	1.4614	0.7308	38.8308	22.1155	60.9463	2.0757	0.5181	1.14373	0.571961	1.4274	0.8464	2.50755	4.13194	2.08807	1.42736	1.47989	112	1.5278	1.6142	0.8068	40.1308	19.9449	60.0757	1.7304	0.4646	1.05655	0.528091	0.704083	0.442	1.81556	4.76663
65	Participant_065	20	Male	17	TFMS>14	168	60	21.2585	21.3	4	4800	600	693	6093	24		110	1.5278	1.6684	0.8343	41.0548	18.1618	59.2166	2.4858	0.6631	1.09204	0.546111	1.00281	0.5329	1.67386	5.16414	1.12587	1.0028	0.975754	120	1.8333	1.8234	0.9117	43.1322	14.6217	57.7539	2.9787	2.0417	0.994576	0.497288	0.93153	0.5471	1.74417	7.37671
66	Participant_066	22	Female	15	TFMS>14	157	48.7	19.7574	29.3	1	0	0	99	99	33		104	1	1.1443	0.5718	37.1145	24.623	61.7375	3.0168	3.0464	1.14431	0.571765	1.68015	0.9488	2.40715	5.78321	2.19494	1.68011	1.65943	112	1.1944	1.2744	0.6373	38.5651	21.9325	60.4976	2.3437	2.4862	1.06691	0.533545	1.33592	0.705	2.2344	7.04206
67	Participant_067	24	Male	17	TFMS>14	170	65	22.4913	17.2	5	0	0	693	693	26		112	1.3333	1.4216	0.7105	39.3247	20.2251	59.5498	2.0201	2.8561	1.06618	0.532909	1.06544	0.5854	2.41756	6.16561	1.62889	1.06552	1.09842	120	1.6111	1.5986	0.799	41.4076	16.5869	57.9945	2.0514	1.4099	0.992203	0.495932	0.94735	0.4063	1.68061	4.48426
68	Participant_068	20	Male	15	TFMS>14	182	66	19.9251	9.2	9	0	120	495	615	56		105	1.2222	1.3875	0.6941	38.8785	21.8025	60.681	2.194	1.1265	1.13519	0.567885	2.04757	1.0394	3.87566	8.18897	2.93832	2.04771	1.83021	110	1.4722	1.599	0.7994	40.5286	18.1756	58.7042	2.4081	1.8417	1.08611	0.542963	1.37728	0.6563	2.34995	7.79397
69	Participant_069	26	Male	15	TFMS>14	172	73	24.6755	22.6	8	240	120	1980	2340	26		109	1.3333	1.461	0.7302	39.5302	20.1622	59.6924	3.2738	1.9476	1.09574	0.547685	1.43332	0.8645	2.11231	6.35099	2.17515	1.43335	1.57844	117	1.6111	1.6411	0.8204	40.7244	17.9926	58.717	1.8352	1.3623	1.01862	0.509224	0.863717	0.3806	1.52881	5.09654
70	Participant_070	20	Female	11	TFMS≤14	160	52.4	20.4687	32.1	1	240	0	297	537	32		103	0.9444	1.097	0.5485	38.5888	22.7718	61.3606	3.9034	0.1311	1.16157	0.580784	2.30229	1.4361	2.97936	6.64067	2.86992	2.30231	2.47274	111	1.1389	1.225	0.6124	40.0778	19.5402	59.618	2.9774	0.7563	1.07564	0.537727	1.6323	0.8411	2.3634	5.38889
71	Participant_071	20	Female	12	TFMS≤14	159	56.5	22.3488	28	16	0	0	396	396	59		107	1.0556	1.183	0.5916	39.3771	19.8148	59.1919	2.7344	3.5696	1.12075	0.560472	1.84137	0.8647	2.79223	8.1646	2.27244	1.84127	1.54288	107	1.2778	1.4176	0.7088	40.5102	16.6327	57.1429	3.5818	5.6318	1.10943	0.554717	1.50035	0.723	2.64452	5.42365
72	Participant_072	24	Male	18	TFMS>14	190	79	21.8837	15.3	9	0	0	3960	3960	33		107	1.3333	1.4859	0.7431	39.8965	21.9845	61.8809	4.3719	4.5995	1.11442	0.557308	1.52819	0.885	3.94671	5.67718	2.45407	1.52823	1.58805	112	1.6111	1.7163	0.8581	40.8944	19.5938	60.4881	3.4258	3.4391	1.06527	0.532636	1.36159	0.7126	2.58642	6.08203
73	Participant_073	24	Male	17	TFMS>14	174	107	35.3415	33.7	14	0	0	693	693	79		106	1.1667	1.3181	0.6591	38.0426	22.2979	60.3404	2.6355	4.1627	1.12981	0.564904	2.07211	1.1868	3.15646	5.96783	2.75255	2.07206	2.10094	112	1.3889	1.4727	0.7364	39.0947	20.8676	59.9623	2.3885	2.3841	1.06036	0.530182	1.32109	0.7259	2.22562	5.17357
74	Participant_074	26	Male	16	TFMS>14	174	74.2	24.5079	9.3	3	1200	3360	495	5055	45		102	1.1667	1.3592	0.6796	39.073	22.1803	61.2532	3.5846	0.8383	1.165	0.5825	2.11829	1.1192	3.51803	4.96837	3.17845	2.11827	1.92129	112	1.3889	1.4806	0.7405	39.809	20.2286	60.0375	3.0361	0.3849	1.066	0.533182	1.88129	0.9599	2.94381	9.22506
75	Participant_075	19	Female	14	TFMS≤14	162	51.5	19.6235	24.3	6	1920	0	693	2613	30		109	1.0278	1.125	0.5626	37.997	22.5343	60.5312	4.6211	3.8004	1.09463	0.547407	2.2565	1.2047	4.51641	6.8855	3.85718	2.2564	2.20074	117	1.2222	1.2458	0.6233	39.3099	20.3823	59.6922	3.4269	2.507	1.01931	0.51	2.38132	1.2141	3.68533	9.20308
76	Participant_076	20	Male	16	TFMS>14	175	66	21.551	17.2	7	2400	1200	693	4293	23		97	1.1389	1.4001	0.7004	37.553	24.1823	61.7353	3.8388	1.8776	1.22938	0.615	2.0964	1.287	3.36538	6.24506	3.08835	2.09633	2.0926	108	1.3611	1.5049	0.7526	39.3686	21.1092	60.4778	2.902	0.3894	1.10566	0.552925	2.3076	1.3226	3.84139	6.69613
77	Participant_077	20	Male	16	TFMS>14	174	68	22.46	17.8	10	240	120	693	1053	54		113	1.3333	1.4093	0.7049	39.5337	21.5577	61.0914	2.7186	1.5938	1.05696	0.528661	1.31286	0.6443	2.4708	5.31179	2.02516	1.31292	1.21871	115	1.6111	1.6662	0.8333	40.6277	19.542	60.1696	2.5811	1.9819	1.03421	0.517193	1.68894	0.8984	2.23468	6.9609
78	Participant_078	23	Female	14	TFMS≤14	157	45.1	18.2969	23.7	12	240	360	396	996	32		113	1.3889	1.4618	0.7308	41.0248	17.9674	58.9922	2.543	0.0414	1.0525	0.526161	1.5985	0.8711	2.56918	6.9192	2.20266	1.59845	1.65561	121	1.6667	1.6406	0.8204	42.4145	15.0864	57.5008	2.1455	0.1994	0.984333	0.49225	1.08733	0.4952	1.70154	7.03813
79	Participant_079	21	Male	11	TFMS≤14	175	70.7	23.0857	19.4	17	3360	1200	693	5253	64		102	1.1389	1.333	0.6664	39.73	20.6425	60.3725	2.7281	0.2584	1.1704	0.5851	1.87154	1.1022	3.93984	11.8014	2.93726	1.87161	1.88383	109	1.3611	1.4977	0.7489	41.0636	17.7045	58.7681	2.5449	0.409	1.10037	0.550185	1.11936	0.6307	2.39312	8.40182
80	Participant_080	20	Male	17	TFMS>14	170	58.6	20.2768	13.3	8	720	360	693	1773	24		105	1.1111	1.2649	0.6321	38.6152	22.4595	61.0748	2.8771	1.002	1.13843	0.568922	1.44885	0.9616	2.75979	6.55402	1.92796	1.44883	1.69019	112	1.3333	1.4143	0.707	40.144	19.6606	59.8046	2.1214	0.0419	1.06073	0.530273	1.35555	0.6837	2.10791	6.24193
81	Participant_081	20	Male	12	TFMS≤14	172	67.1	22.6812	18.9	1	1920	240	495	2655	29		103	1.1389	1.3216	0.6611	39.0038	21.6994	60.7032	4.2163	0.5179	1.1604	0.5805	3.82276	2.1708	6.876	7.23937	5.46528	3.82285	3.73959	110	1.3611	1.4763	0.7374	40.4303	18.9688	59.399	2.9838	0.5377	1.08463	0.541759	2.28408	1.0978	4.07838	12.3677
82	Participant_082	20	Male	13	TFMS≤14	168	65.5	23.2072	21.5	4	720	120	297	1137	27		107	1.1389	1.2768	0.6384	39.5658	21.205	60.7708	2.9248	0.8543	1.12113	0.560566	1.31578	0.787	3.29704	8.81726	2.41415	1.31571	1.40402	114	1.3611	1.4248	0.7122	41.4705	17.8267	59.2972	3.2779	1.8364	1.04679	0.523214	1.52235	0.8261	2.87409	9.73203
83	Participant_083	20	Male	14	TFMS≤14	177	95	30.3233	32.3	1	0	0	198	198	24		100	0.9167	1.0892	0.5443	39.8145	20.5771	60.3916	4.8456	0.519	1.18816	0.593776	1.98052	1.2102	5.15491	8.33451	3.23538	1.98057	2.03816	104	1.1111	1.2789	0.6395	40.5451	19.4208	59.9659	4.1189	1.2685	1.15098	0.575588	2.42854	1.3527	3.47662	9.61031
84	Participant_084	21	Female	15	TFMS>14	160	57.1	22.3047	27.5	10	0	0	594	594	43		109	1.1944	1.3008	0.6505	38.7519	22.4112	61.1631	2.4383	0.2192	1.08907	0.54463	2.0779	1.0177	3.07675	6.04296	3.00851	2.0779	1.86857	116	1.5278	1.5616	0.7809	40.3193	19.2413	59.5606	2.4003	0.2923	1.02211	0.51114	0.965148	0.5045	1.90058	5.3619
85	Participant_085	23	Female	18	TFMS>14	161	51.9	20.0224	28.3	8	0	0	495	495	35		109	1.25	1.3641	0.6821	39.4706	20.4141	59.8846	2.8252	1.6205	1.0913	0.545648	0.966663	0.5275	2.1725	6.13987	1.44277	0.966654	0.966654	118	1.5	1.5147	0.7576	41.4205	16.4589	57.8795	2.9497	1.6759	1.00983	0.505086	0.998614	0.5042	1.85584	5.14919
86	Participant_086	21	Female	17	TFMS>14	157	58.7	23.8144	34.8	0	480	240	396	1116	32		107	1.1667	1.3001	0.6497	39.2652	21.7406	61.0058	2.3637	0.6923	1.11434	0.556887	1.36718	0.8861	2.31554	5.48191	1.72918	1.36719	1.59115	113	1.3889	1.4618	0.7309	40.4649	18.7309	59.1958	2.9099	0.8351	1.0525	0.52625	1.23422	0.7749	2.22885	7.25539
87	Participant_087	19	Female	15	TFMS>14	173	55	18.3768	26.5	8	0	0	198	198	54		101	1.3333	1.5757	0.7885	39.516	20.1388	59.6548	4.2905	2.0768	1.1818	0.5914	1.83592	1.0632	3.4047	7.88279	3.28909	1.83593	1.79777	109	1.6111	1.7716	0.8855	41.4894	16.5923	58.0817	2.9574	0.9295	1.09962	0.549623	2.08253	1.0939	3.14876	7.57882
88	Participant_088	23	Female	14	TFMS≤14	160	55.8	21.7969	37.8	0	0	240	297	537	41		99	0.9167	1.1105	0.5548	37.0077	25.8298	62.8375	4.1413	0.4086	1.21146	0.605208	3.57443	1.9525	7.28281	5.47275	4.72568	3.57427	3.22608	107	1.1111	1.2419	0.6206	38.6442	23.4687	62.1129	5.5347	2.071	1.11769	0.558558	2.4728	1.4489	4.5686	4.22946
89	Participant_089	24	Female	14	TFMS≤14	165	55	20.202	33.4	6	0	0	495	495	30		103	1.1944	1.3799	0.6907	40.6823	18.3978	59.0801	3.0996	0.5824	1.15529	0.578235	2.43225	1.3749	4.35374	13.9865	3.44837	2.43231	2.3778	113	1.4444	1.5352	0.7674	41.6667	15.709	57.3757	2.5895	2.2724	1.06286	0.53125	1.88773	0.9555	2.63352	6.46954
90	Participant_090	20	Male	19	TFMS>14	172	65	21.9713	16.8	8	720	1440	594	2754	31		113	1.2222	1.2914	0.6457	39.6992	21.396	61.0951	2.3603	2.0211	1.05661	0.528304	1.63219	0.7865	2.83305	4.89204	2.14125	1.63218	1.48868	114	1.4722	1.5435	0.7713	40.6575	19.1449	59.8024	2.6577	1.1173	1.04839	0.523929	1.48393	0.766	2.92369	5.11572
91	Participant_091	25	Female	17	TFMS>14	159	54	21.3599	21.9	5	0	0	297	297	70		117	1.4167	1.445	0.7221	40.9398	18.5429	59.4828	2.429	1.0376	1.02	0.509741	1.44503	0.7567	2.14241	5.77741	1.80388	1.44501	1.4845	126	1.6944	1.6073	0.8039	41.9486	15.6946	57.6433	2.7207	0.9681	0.948548	0.474435	1.45246	0.6962	2.23035	5.25722
92	Participant_092	25	Female	16	TFMS>14	165	47.4	17.4105	23	7	0	480	1782	2262	33		122	1.4167	1.3893	0.695	41.9443	16.6044	58.5486	3.0666	1.1227	0.980667	0.490583	2.17802	1.1729	3.24168	6.13091	2.55805	2.17805	2.39089	129	1.6944	1.5745	0.7873	43.5009	13.7716	57.2726	7.6605	1.7941	0.929219	0.464609	1.33583	2.4895	7.90926	25.1271
93	Participant_093	21	Female	14	TFMS≤14	162	58.8	22.4051	33.4	2	0	480	693	1173	51		107	0.8333	0.9336	0.4667	37.7905	24.1832	61.9737	5.4862	0.6219	1.12038	0.560094	2.82765	1.5826	5.46301	13.1074	4.14079	2.82762	2.8256	108	1	1.1059	0.5528	39.6349	20.8667	60.5016	5.2498	0.296	1.10585	0.55283	2.80188	1.465	5.03975	11.7699
94	Participant_094	22	Female	12	TFMS≤14	165	58	21.3039	31	15	480	0	297	777	28		99	1	1.2069	0.6031	38.2651	22.1677	60.4329	3.2356	3.346	1.20694	0.603061	2.5065	1.3008	5.32365	11.3661	4.08635	2.50641	2.15695	104	1.1944	1.3713	0.6853	40.205	18.2579	58.4629	3.0107	3.275	1.14804	0.573725	1.69897	0.9744	2.8877	7.27247
95	Participant_095	24	Male	17	TFMS>14	168	68	24.093	19.1	4	3840	1920	693	6453	31		101	1	1.1782	0.5888	36.9717	25.4795	62.4512	3.1922	1.549	1.1782	0.5888	2.11127	1.275	3.7929	4.33446	2.77513	2.11126	2.1654	111	1.1944	1.2854	0.643	38.9255	22.1321	61.0576	2.4726	0.0434	1.07618	0.538364	1.61905	0.8741	2.62322	6.95144
96	Participant_096	23	Female	14	TFMS≤14	163	63	23.7118	35.6	21	240	240	1386	1866	63		114	1.5278	1.6044	0.8021	41.3195	16.4598	57.7793	2.0737	2.1576	1.05018	0.525	1.14509	0.5175	1.69145	4.96665	1.50261	1.14508	0.985808	125	1.8333	1.7597	0.8797	42.4635	14.0481	56.5115	2.055	2.3853	0.959839	0.479839	1.17591	0.5156	1.7276	6.35958
97	Participant_097	24	Male	18	TFMS>14	172	70.8	23.9319	19.2	5	0	0	495	495	39		115	1.5	1.5621	0.7812	40.9367	18.2783	59.215	2.1633	0.3711	1.0414	0.520789	1.2125	0.6198	2.49092	5.51528	1.71325	1.21247	1.19007	124	1.8056	1.7399	0.8699	42.0891	15.9918	58.081	2.0538	0.4783	0.963607	0.481803	0.841001	0.425	1.63962	4.43978
98	Participant_098	25	Male	15	TFMS>14	166	65.9	23.9149	8.6	1	2240	480	594	3314	23		107	1.25	1.3979	0.6987	38.8392	21.208	60.0472	4.6575	2.8267	1.1183	0.558962	1.10863	0.6961	2.15169	6.10194	1.63038	1.10868	1.24529	119	1.5	1.5031	0.7515	40.6631	18.4878	59.1509	2.9803	0.4565	1.00203	0.501017	1.29632	0.6363	2.15207	5.20884
99	Participant_099	22	Male	14	TFMS≤14	171	61	20.8611	10.1	4	6000	600	1188	7788	25		110	1.3889	1.509	0.7544	40.6341	18.3399	58.9739	2.4941	0.9601	1.08648	0.543148	1.07973	0.6404	1.97593	5.7334	1.33958	1.07974	1.17911	117	1.6667	1.7035	0.8517	41.9197	15.9413	57.861	1.8692	0.5218	1.02207	0.511034	1.25558	0.5314	1.76099	5.58737
100	Participant_100	20	Female	17	TFMS>14	159	61.7	24.4057	35	8	0	0	495	495	61		79	0.6667	1.0098	0.5044	35.1459	31.4802	66.6261	4.6361	4.8935	1.51474	0.756579	2.46451	1.93	9.58092	7.36399	4.31978	2.46429	2.55101	86	0.8056	1.1266	0.5633	35.5635	29.7072	65.2707	3.594	2.3736	1.39857	0.699286	1.29213	0.8492	4.94918	7.81561
101	Participant_101	22	Female	14	TFMS≤14	160	57.3	22.3828	34.5	8	0	240	297	537	41		109	1.1389	1.2534	0.6267	40.2366	20.4869	60.7235	3.8512	2.2444	1.10057	0.550283	2.22165	1.301	3.72024	6.67549	2.82049	2.22156	2.36424	116	1.3611	1.4055	0.7026	41.1145	18.5865	59.701	3.7945	1.9275	1.03263	0.516228	2.04044	1.0853	3.12566	5.91451
102	Participant_102	23	Female	16	TFMS>14	158	57.8	23.1533	33.6	2	0	0	396	396	30		97	1.1389	1.4067	0.7033	40.4823	18.7769	59.2593	3.388	0.6236	1.23511	0.617553	3.57765	2.1804	5.29565	12.7476	3.74338	3.57772	3.53064	107	1.3611	1.5126	0.7558	41.6978	15.8065	57.5042	2.9561	1.8956	1.11132	0.555283	1.55403	0.7735	3.05292	8.82042
103	Participant_103	26	Male	14	TFMS≤14	176	85.4	27.5697	25.9	2	1200	600	792	2592	27		102	1.1944	1.4037	0.7016	39.7379	22.4472	62.1852	2.9524	4.9604	1.1752	0.5874	1.66078	1.0356	2.85823	5.41137	2.4033	1.66084	1.76297	113	1.4444	1.5348	0.7674	40.486	20.2943	60.7803	2.9637	3.2472	1.06255	0.531273	0.901197	0.5065	1.72998	5.61931
104	Participant_104	26	Male	17	TFMS>14	178	66.6	21.0201	14.7	10	0	120	198	318	26		102	1.1667	1.3722	0.6864	38.0377	22.9213	60.959	2.3172	2.6033	1.1762	0.5883	1.56674	0.8343	3.67346	6.58514	2.48249	1.56667	1.4182	109	1.3889	1.5283	0.7643	40.0377	19.6331	59.6708	2.3076	0.7538	1.10038	0.550283	1.42289	0.8208	2.63152	9.66124
105	Participant_105	23	Female	18	TFMS>14	162	56	21.3382	21.8	5	720	720	693	2133	28		108	1.3333	1.4626	0.7311	38.9405	21.8266	60.7671	2.6554	0.6911	1.09698	0.548302	1.25946	0.7	2.51306	5.37051	1.88967	1.25948	1.27671	116	1.6111	1.6555	0.8275	41.1986	18.098	59.2966	2.1307	1.2091	1.02754	0.513596	1.11303	0.5905	2.24279	5.26357
106	Participant_106	24	Male	15	TFMS>14	162	61.5	23.4339	18.8	5	480	720	495	1695	41		107	1.2222	1.3629	0.6812	39.5262	19.9154	59.4416	4.4461	2.5778	1.11509	0.557358	1.87316	1.1558	3.17941	7.76434	2.70232	1.87322	2.07371	116	1.4722	1.511	0.7552	41.2308	16.1368	57.3675	3.5499	3.2869	1.02632	0.512982	1.54469	0.7366	2.41082	9.14184
107	Participant_107	19	Female	13	TFMS≤14	170	62	21.4533	28.6	1	0	0	693	693	33		108	1.0556	1.1677	0.5839	39.1779	21.5589	60.7368	3.7191	0.2174	1.10623	0.553208	1.93347	1.1331	3.96499	7.11771	2.91487	1.93344	2.04824	114	1.2778	1.3469	0.673	39.8611	19.5663	59.4274	4.1682	1.7692	1.05411	0.526696	1.91238	1.131	3.92362	7.19962
108	Participant_108	25	Male	15	TFMS>14	179	61	19.0381	13.4	6	0	120	297	417	30		107	1.1667	1.3013	0.651	40.8966	18.3103	59.2069	2.2027	0.2897	1.11538	0.557981	1.43343	0.742	2.76111	7.29152	1.58731	1.43343	1.32981	112	1.3889	1.4843	0.7427	42.3784	15.6005	57.9789	2.523	0.8466	1.06873	0.534727	2.49212	1.326	3.17143	8.73434
109	Participant_109	23	Female	14	TFMS≤14	158	54.8	21.9516	30.1	8	0	480	495	975	47		90	0.8889	1.1907	0.5955	37.3261	24.8558	62.1819	3.1946	1.3096	1.33955	0.669886	2.16458	1.5169	4.88023	6.50874	3.1157	2.16453	2.26443	99	1.0556	1.2737	0.6366	38.346	22.721	61.067	2.4905	1.4005	1.20667	0.603125	1.79304	1.1069	3.22667	6.53008
110	Participant_110	24	Male	15	TFMS>14	181	78	23.8088	20.8	6	0	0	297	297	30		96	1.0556	1.3125	0.6565	38.3128	21.0815	59.3943	4.7574	5.8126	1.2434	0.621915	2.55025	1.5108	6.64739	7.11951	4.79979	2.55015	2.42925	101	1.2778	1.5161	0.7582	40.6949	17.2343	57.9291	3.4808	3.2589	1.18653	0.593367	2.79041	1.4547	4.41259	16.6633
111	Participant_111	27	Female	14	TFMS≤14	162	51	19.433	28.5	14	480	240	594	1314	26		107	1.0556	1.1818	0.5906	38.8355	22.6726	61.5081	2.5944	0.9148	1.11962	0.559519	1.45469	0.8278	2.39497	6.30629	2.13956	1.45461	1.47942	113	1.2778	1.3385	0.669	40.3853	19.3488	59.7341	1.824	0.2959	1.0475	0.523571	1.0862	0.6662	2.336	7.20975
112	Participant_112	24	Female	13	TFMS≤14	157	49	19.8791	25.6	16	0	120	1485	1605	27		109	1	1.0972	0.5489	37.9241	23.8819	61.8059	4.462	0.7095	1.09722	0.548889	2.38844	1.3699	5.56849	6.61463	3.89008	2.38835	2.49571	113	1.1944	1.2589	0.6296	39.6984	20.8404	60.5388	3.4059	0.5993	1.05393	0.527143	2.52732	1.2812	3.74171	8.20954
113	Participant_113	26	Male	15	TFMS>14	187	87.1	24.9078	20.3	15	0	120	297	417	41		103	1.2778	1.4772	0.7387	39.3657	21.5061	60.8718	2.6987	0.605	1.15608	0.578137	1.54241	1.0047	2.63199	5.44915	2.13235	1.54239	1.73782	110	1.5278	1.6565	0.8283	40.6661	18.924	59.5901	2.4467	0.632	1.08426	0.54213	1.21173	0.7045	2.60364	5.72923
114	Participant_114	23	Male	16	TFMS>14	176	77	24.858	12.6	8	4000	2000	594	6594	25		97	1.1389	1.3921	0.6958	37.924	24.7656	62.6896	1.7487	1.6312	1.22229	0.610938	0.903037	0.5742	2.31437	5.63483	1.64828	0.903034	0.939933	104	1.3611	1.5661	0.7832	39.3149	22.1711	61.486	2.3325	2.0583	1.15059	0.575392	1.7502	1.0703	2.83099	5.15987
115	Participant_115	27	Male	13	TFMS≤14	175	97	31.6735	35	19	480	800	1386	2666	78		110	1.1111	1.207	0.6036	38.493	23.2867	61.7797	3.4986	0.8288	1.0863	0.543241	1.40945	0.7827	2.40148	5.26781	1.91179	1.40947	1.44074	115	1.3333	1.3761	0.6881	39.5377	20.8057	60.3434	2.86	0.3005	1.03211	0.516053	1.3054	0.6264	1.92095	5.40958
116	Participant_116	27	Male	16	TFMS>14	168	59.8	21.1876	18.6	21	0	160	1386	1546	57		106	1.25	1.4168	0.7083	39.1245	21.4964	60.621	2.2537	0.6484	1.13346	0.566635	0.945882	0.6022	2.74023	7.90225	2.05473	0.945865	1.06285	112	1.5	1.6012	0.8006	40.402	19.0087	59.4107	2.3344	0.4627	1.06745	0.533727	0.914689	0.4788	1.56923	4.77676
117	Participant_117	24	Female	13	TFMS≤14	161	52.1	20.0995	31.7	5	0	0	495	495	50		105	1	1.1333	0.5665	36.9591	25.1485	62.1076	4.1189	2.4939	1.13327	0.566538	1.4959	1.0169	2.35233	4.51359	1.70494	1.4959	1.79488	113	1.1944	1.258	0.6291	38.5046	22.7535	61.2581	2.6238	0.6146	1.05321	0.526696	1.12205	0.6961	2.07767	5.444
118	Participant_118	24	Female	15	TFMS>14	165	64.7	23.7649	36.6	8	0	0	99	99	29		101	1.0833	1.2835	0.6421	39.7367	21.8096	61.5463	3.7523	3.2818	1.1848	0.5927	3.0443	1.7894	5.32279	12.1781	4.23502	3.04429	3.01913	110	1.3056	1.4216	0.7106	40.1361	20.6633	60.7993	2.6562	2.3581	1.08889	0.544259	1.33049	0.8466	3.05635	6.89145
119	Participant_119	20	Male	14	TFMS≤14	175	63	20.5714	11.6	10	240	0	297	537	26		96	0.8333	1.0369	0.5182	39.6375	21.5629	61.2004	4.9757	2.1366	1.24426	0.621809	2.54539	1.7055	4.91252	13.3016	4.35553	2.54551	2.74284	101	1	1.1852	0.5926	39.892	19.9629	59.8549	3.2732	0.6325	1.1852	0.5926	2.01257	1.2737	3.17232	8.76877
120	Participant_120	23	Female	12	TFMS≤14	160	54.1	21.1328	29.1	9	0	160	231	391	39		114	1.4444	1.5107	0.7555	40.4132	20.0956	60.5088	3.088	2.3511	1.04589	0.523036	1.634	0.7361	2.70629	5.83461	2.06499	1.634	1.40727	123	1.7222	1.6711	0.8357	41.409	17.7564	59.1654	2.7173	1.3969	0.970328	0.485246	1.51567	0.674	2.20846	7.65808
121	Participant_121	23	Female	13	TFMS≤14	159	55.3	21.8741	36.5	7	480	960	2772	4212	53		117	1.25	1.2731	0.6366	39.1739	21.6861	60.86	3.4977	0.0865	1.01845	0.50931	1.64903	0.7625	3.23915	6.25055	2.16809	1.64908	1.49718	130	1.5	1.3856	0.6928	41.1874	17.7943	58.9817	2.724	0.4115	0.92375	0.461875	1.60685	0.768	2.44419	6.03283
122	Participant_122	25	Male	17	TFMS>14	166	69.1	25.0762	23.2	13	960	480	1386	2826	47		115	1.2778	1.3289	0.6644	40.4184	19.5344	59.9528	2.4611	0.9224	1.04	0.52	1.1103	0.607	2.36155	4.51358	1.63812	1.11029	1.16726	124	1.5278	1.4782	0.7393	41.9688	16.3673	58.3362	2.2462	0.7293	0.967541	0.483934	1.16358	0.5516	1.94287	5.32647
123	Participant_123	25	Male	12	TFMS≤14	172	86.9	29.374	26.7	5	480	320	990	1790	37		110	1.3333	1.4479	0.7237	37.4318	24.6078	62.0396	2.9608	1.4024	1.08593	0.542778	1.82899	0.9655	3.45508	4.78385	2.42861	1.82907	1.77873	118	1.6111	1.6325	0.816	39.2037	21.7118	60.9154	2.124	0.3043	1.01328	0.506466	1.56995	0.8095	2.49721	4.76193
124	Participant_124	24	Male	13	TFMS≤14	175	72.1	23.5429	27.5	6	960	480	396	1836	41		106	1.2778	1.4323	0.7158	39.8696	21.1872	61.0568	2.5632	2.2646	1.12096	0.560192	1.45605	0.8433	2.71836	4.4272	1.9382	1.456	1.50539	115	1.5278	1.5739	0.7871	40.923	18.5286	59.4516	2.6909	0.9197	1.03018	0.515175	1.56935	0.688	2.18508	8.04216
125	Participant_125	24	Male	12	TFMS≤14	173	100	33.4124	34	8	3360	0	2772	6132	35		111	1.3333	1.4381	0.719	38.7728	22.8759	61.6487	1.8866	1.0929	1.07855	0.539273	1.0522	0.5832	1.71022	4.71938	1.27059	1.05222	1.08152	118	1.6111	1.6278	0.8136	39.8464	20.8362	60.6826	1.57	1.3139	1.01034	0.505	0.954407	0.4549	1.71609	3.01207
126	Participant_126	25	Female	14	TFMS≤14	167	62	22.231	31.6	6	1200	800	495	2495	42		111	1.25	1.3539	0.6767	41.8533	17.2679	59.1212	2.5007	2.355	1.08315	0.541389	1.25415	0.6626	2.51856	5.85827	1.55985	1.25415	1.22389	119	1.5	1.5153	0.7575	43.0201	14.7483	57.7685	3.4376	1.8501	1.01017	0.505	1.42922	0.7972	2.5072	7.76564
127	Participant_127	27	Female	17	TFMS>14	163	57	21.4536	26.3	5	480	0	2079	2559	23		111	1.2222	1.3142	0.6571	38.8231	22.6919	61.515	2.1131	0.8749	1.07527	0.537636	1.06187	0.4848	1.91613	3.81414	1.43461	1.06191	0.901746	117	1.4722	1.5078	0.7538	39.9495	19.7306	59.6801	1.8104	0.9228	1.02414	0.511983	0.851119	0.4249	1.41629	4.77684
128	Participant_128	24	Male	15	TFMS>14	165	71	26.079	28.1	8	2400	1200	2079	5679	24		115	1.3333	1.3914	0.6956	40.77	19.4351	60.2051	3.097	2.4208	1.04351	0.521667	1.39606	0.703	2.60191	5.43141	1.99518	1.39613	1.34752	122	1.6111	1.577	0.7888	41.7334	17.1463	58.8796	2.7405	1.4965	0.978833	0.489583	1.08905	0.4681	1.50431	5.00458
129	Participant_129	22	Female	14	TFMS≤14	161	47.4	18.2863	19.9	2	240	0	0	240	46		97	1.1389	1.3918	0.6958	38.851	22.8606	61.7116	1.9048	1.4586	1.22208	0.610938	1.30411	0.8457	2.22851	5.38744	2.28774	1.3041	1.38423	104	1.3611	1.5485	0.7746	40.9169	18.8211	59.738	2.1927	1.5407	1.13765	0.569118	0.863158	0.4922	1.83103	5.38332
130	Participant_130	22	Female	14	TFMS≤14	165	45.6	16.7493	15.2	8	0	320	2079	2399	42		93	0.9444	1.2046	0.6026	37.532	23.8793	61.4113	3.9029	2.7767	1.27543	0.638043	1.96649	1.2575	4.50016	11.1724	3.73579	1.96663	1.97085	101	1.1389	1.3355	0.6675	38.7003	21.6954	60.3957	3.382	2.309	1.1726	0.5861	1.69543	1.0064	3.8979	11.2208
131	Participant_131	20	Female	11	TFMS≤14	165	82.6	30.3398	40.3	9	0	320	1188	1508	71		98	1.0833	1.3192	0.6595	37.3995	24.6536	62.053	3.6601	1.4533	1.21771	0.60875	2.67269	1.5087	5.61826	6.70044	4.36288	2.67284	2.47829	109	1.3056	1.4322	0.7164	38.7914	21.894	60.6853	4.6576	1.34	1.09704	0.548704	1.84527	1.0637	4.45588	9.07098
132	Participant_132	23	Male	18	TFMS>14	173	56.3	18.8112	9.2	8	1920	240	792	2952	24		102	1.1389	1.3307	0.665	38.5484	22.1671	60.7155	3.6202	1.8914	1.1684	0.5839	1.70625	1.0691	3.47874	7.7218	2.51748	1.70626	1.83091	113	1.3611	1.4343	0.7173	40.0949	18.8782	58.9731	3.9416	2.298	1.05375	0.526964	1.37239	0.6923	1.71568	5.36068
133	Participant_133	22	Male	16	TFMS>14	178	88.1	27.8058	26.5	5	0	0	2079	2079	26		98	1.1111	1.344	0.672	37.8574	24.2852	62.1426	4.2043	0	1.20958	0.604792	1.65309	0.8658	4.79114	7.91264	2.94404	1.65311	1.43153	106	1.3333	1.5074	0.7535	38.8161	22.5038	61.32	2.6832	0.3512	1.13058	0.565096	1.10271	0.7996	3.83629	7.20812
134	Participant_134	20	Male	14	TFMS≤14	171	56.9	19.459	11.7	7	0	0	1386	1386	39		107	1.1389	1.2678	0.6335	38.8814	20.9153	59.7966	5.9363	3.3437	1.11321	0.556226	2.67953	1.4855	3.88206	7.9559	3.69703	2.67946	2.67064	117	1.3611	1.3869	0.6932	40.8122	18.0711	58.8832	3.8658	0.7435	1.01897	0.50931	1.88242	1.0148	3.12039	7.82797
135	Participant_135	25	Male	13	TFMS≤14	173	81.7	27.2979	25.6	9	960	140	495	1595	30		107	1.0833	1.2194	0.6096	38.5956	21.5787	60.1743	4.1504	2.9968	1.12558	0.562692	1.94335	0.9681	4.04632	9.19379	2.50589	1.94343	1.7204	115	1.3056	1.3578	0.6784	40.6377	19.4501	60.0877	3.5184	1.8011	1.04	0.519649	1.44089	0.7828	2.82373	8.34135
136	Participant_136	20	Female	17	TFMS>14	157	53	21.5019	27.3	7	960	2400	6930	10290	42		101	1.0278	1.2152	0.6076	37.7368	23.7483	61.4851	3.6539	2.0409	1.1824	0.5912	1.60979	0.9775	2.84868	7.66497	2.56648	1.60966	1.6535	116	1.2222	1.2567	0.6286	39.5496	20.099	59.6485	3.6827	2.0073	1.02825	0.514298	1.38889	0.7221	2.6511	4.50172
137	Participant_137	25	Male	10	TFMS≤14	169	68	23.8087	16.5	0	1920	960	2970	5850	22		105	1.1389	1.2905	0.6452	38.7475	22.539	61.2865	2.5236	0.0876	1.13308	0.566538	1.41178	0.7999	2.87477	8.09086	2.15643	1.41185	1.41186	110	1.3611	1.4796	0.7393	40.0341	19.9319	59.9659	2.8692	0	1.08704	0.543148	2.39904	1.3169	3.28645	4.82794
138	Participant_138	26	Male	15	TFMS>14	172	81	27.3797	34.4	5	0	0	198	198	73		92	1.0833	1.404	0.7019	38.5288	22.6852	61.214	2.015	0.6653	1.296	0.647889	1.02103	0.6624	2.53109	5.45069	2.1781	1.02106	1.02239	100	1.3056	1.5605	0.7804	39.6449	20.5566	60.2015	2.1162	0.3868	1.19531	0.597755	1.08364	0.7147	2.43411	4.39518
139	Participant_139	24	Female	15	TFMS>14	161	59.2	22.8386	27	8	0	160	396	556	51		94	0.9444	1.1943	0.5972	38.3703	22.95	61.3203	5.817	0.8032	1.26457	0.632283	2.12887	1.1263	5.6145	6.82876	4.04793	2.12897	1.78132	103	1.1389	1.3213	0.6606	39.7345	20.1862	59.9207	3.4366	0.9318	1.1602	0.58	1.38438	0.8485	3.34822	5.4349
140	Participant_140	24	Female	10	TFMS≤14	162	66	25.1486	38.9	4	0	0	693	693	43		95	1	1.2506	0.6248	36.7812	25.2127	61.9939	3.7092	3.276	1.25064	0.624787	2.31169	1.3721	3.50233	8.25735	3.10095	2.31158	2.19603	110	1.1944	1.3017	0.6511	37.791	23.3475	61.1385	2.3213	2.7934	1.08981	0.545093	1.32726	0.6837	2.04176	6.73049
141	Participant_141	26	Male	17	TFMS>14	175	70	22.8571	16.3	9	0	0	396	396	29		110	1	1.0802	0.54	36.9964	24.0357	61.0321	4.4309	5.1919	1.08019	0.54	1.45279	1	4.44341	5.77183	2.92174	1.45277	1.85185	117	1.1944	1.22	0.61	39.0108	21.7083	60.7191	3.2103	0.69	1.02138	0.51069	1.12724	0.6529	3.00301	5.48638
142	Participant_142	26	Male	16	TFMS>14	178	77.7	24.5234	24.4	1	480	240	693	1413	26		101	1.1111	1.3175	0.6593	38.6575	22.0826	60.7401	3.2677	1.5592	1.18571	0.593367	1.33071	0.8106	2.87913	5.54056	2.03655	1.33077	1.36604	111	1.3333	1.4262	0.7135	39.7416	19.8538	59.5954	2.4932	1.6543	1.06964	0.535091	1.69088	0.912	2.57841	6.22198
143	Participant_143	23	Female	17	TFMS>14	167	53.7	19.2549	26.7	20	0	0	495	495	59		106	1.1389	1.2747	0.6374	37.5945	24.7079	62.3024	2.4032	0.2687	1.11923	0.559712	1.30946	0.7299	2.26469	5.13682	1.57747	1.30945	1.30415	115	1.3611	1.4191	0.7094	39.576	21.2351	60.811	1.9926	0.9827	1.04263	0.521228	1.19882	0.644	2.39135	5.74662
144	Participant_144	23	Female	12	TFMS≤14	161	64	24.6904	36.3	13	0	360	495	855	46		117	1.4167	1.4401	0.7202	39.0434	20.9464	59.9898	3.4751	2.446	1.01655	0.508362	1.74793	0.8428	2.57047	8.1255	2.30589	1.74785	1.65779	126	1.6944	1.6062	0.8032	40.8741	17.3811	58.2552	2.6316	2.1079	0.947937	0.474048	1.34438	0.7063	1.99613	7.38216
145	Participant_145	20	Male	12	TFMS≤14	171	58.9	20.1429	12.8	12	0	0	1386	1386	73		105	1.2222	1.3868	0.6936	40.4407	18.9322	59.3729	2.7621	0.46	1.13462	0.5675	1.39837	0.7436	2.35852	8.69735	2.35966	1.39848	1.31024	114	1.4722	1.5314	0.7657	41.1159	17.8197	58.9356	2.7397	0.1642	1.04018	0.520089	1.44759	0.6846	2.2512	8.34806
146	Participant_146	20	Male	14	TFMS≤14	182	65	19.6232	13.1	8	720	360	2079	3159	58		97	1.1389	1.4139	0.7072	40.2228	20.1371	60.3599	2.5372	1.428	1.24149	0.620957	1.60223	0.9489	3.45575	9.16269	2.56677	1.6022	1.52812	104	1.3611	1.5573	0.779	41.611	17.0523	58.6632	2.5575	0.7296	1.14412	0.572353	1.58799	0.73	2.28617	5.84965
147	Participant_147	20	Male	14	TFMS≤14	173	67	22.3863	22.5	5	720	0	495	1215	32		109	1.1389	1.2431	0.6215	38.4459	22.4975	60.9433	4.2679	1.5762	1.09148	0.545741	1.87771	0.93	3.77804	12.0876	3.26254	1.87769	1.70409	118	1.3611	1.3836	0.6917	39.6879	19.4539	59.1418	3.3366	2.9061	1.01655	0.50819	1.59828	0.7468	2.12105	5.88777
148	Participant_148	20	Male	16	TFMS>14	182	62	18.7175	13.8	7	0	0	990	990	44		95	1.3333	1.6587	0.8296	39.9179	20.1129	60.0308	3.4191	0.1285	1.24404	0.622234	2.583	1.6006	4.51326	9.53816	3.45523	2.58304	2.57228	106	1.6111	1.8094	0.905	41.0445	18.4247	59.4692	3.1511	1.2595	1.12308	0.561731	2.04793	1.1089	3.51959	6.94231
149	Participant_149	23	Male	12	TFMS≤14	189	77.1	21.5839	20.1	9	0	0	594	594	27		104	1.2222	1.4099	0.7051	41.0335	19.3609	60.3944	2.9946	3.5417	1.15353	0.576863	1.41378	0.8222	3.40112	5.37992	2.55388	1.41381	1.42537	111	1.4722	1.5922	0.7964	42.363	16.9692	59.3322	2.5993	3.9681	1.08148	0.540926	1.3483	0.7881	2.40705	8.11176
150	Participant_150	23	Male	15	TFMS>14	174	60.9	20.1149	14.3	0	240	100	594	934	24		107	1.2778	1.4195	0.7096	39.7928	19.82	59.6128	2.8682	1.4828	1.11094	0.555377	1.10956	0.7061	2.55348	6.08073	1.97256	1.10955	1.27139	115	1.5278	1.5878	0.7943	41.0365	17.1506	58.187	2.7704	1.8746	1.0393	0.519912	1.53848	0.835	2.39324	5.89425
151	Participant_151	25	Male	17	TFMS>14	175	76	24.8163	19.5	19	0	0	990	990	33		102	1.1389	1.3332	0.6663	39.689	21.442	61.131	2.1442	2.0879	1.1706	0.585	1.66888	1.0247	2.67656	6.93312	2.47354	1.66885	1.75162	108	1.3611	1.4918	0.7457	40.661	19.0739	59.7349	2.058	1.0025	1.09604	0.54783	0.9435	0.5788	2.11013	6.13299
152	Participant_152	25	Female	17	TFMS>14	154	43	18.1312	23.2	14	0	360	198	558	55		108	1.3611	1.4936	0.7467	41.042	18.2772	59.3191	2.216	0.9498	1.09736	0.548585	0.870007	0.4049	1.6371	5.66553	1.43731	0.869952	0.738066	116	1.6389	1.6814	0.8407	42.8352	14.2442	57.0793	2.219	0.2352	1.02596	0.512982	0.891872	0.5118	1.60195	6.67359
153	Participant_153	24	Female	14	TFMS≤14	166	63	22.8625	23.8	13	0	0	1386	1386	46		113	1.2778	1.3467	0.6732	41.3927	17.1298	58.5225	3.4662	0.2045	1.05393	0.526875	1.23814	0.7474	2.26272	8.06373	1.85809	1.23815	1.41854	124	1.5278	1.4702	0.7352	42.5554	14.9233	57.4787	3.5317	0.0801	0.962295	0.48123	1.2678	0.5773	2.05943	6.19099
154	Participant_154	23	Female	17	TFMS>14	164	60	22.3081	21.7	9	0	0	297	297	42		107	1.2222	1.3627	0.6816	39.8545	19.6141	59.4686	2.2137	1.6843	1.11491	0.557642	1.37871	0.7867	2.36335	3.96602	1.94859	1.3788	1.41077	115	1.4722	1.5309	0.7653	40.4758	17.8843	58.36	2.8306	2.8356	1.03982	0.519825	0.753362	0.397	1.48385	4.54868
155	Participant_155	24	Male	17	TFMS>14	171	65.1	22.2633	12.2	1	2880	480	990	4350	45		105	1.1389	1.2964	0.6484	39.2634	21.8111	61.0745	3.2084	0.8643	1.13827	0.569327	2.26427	1.193	3.14084	5.29822	3.0882	2.26434	2.09553	111	1.3611	1.4663	0.7329	40.2363	19.6793	59.9156	2.6561	0.3782	1.07727	0.538455	1.23217	0.6458	2.85215	9.11059
156	Participant_156	22	Male	16	TFMS>14	181	64	19.5354	10.8	3	480	1200	495	2175	31		107	1.6111	1.8063	0.9035	42.4014	14.9057	57.307	2.8182	0.5932	1.12115	0.560769	0.99959	0.6154	2.75439	8.14655	1.87045	0.999581	1.09739	115	1.9444	2.0062	1.0031	43.2239	13.5691	56.7931	2.3197	0.0393	1.03175	0.515877	0.97976	0.5471	1.97923	6.47501
157	Participant_157	27	Male	13	TFMS≤14	182	66	19.9251	16.6	9	480	160	297	937	34		104	1.3333	1.5367	0.7686	42.0891	16.7574	58.8465	4.0095	2.2482	1.15255	0.576471	2.48301	1.4013	4.05758	8.05734	3.52476	2.48302	2.43084	116	1.6111	1.6614	0.8307	42.0721	16.3321	58.4042	2.6181	1.1387	1.03123	0.515614	1.13545	0.6075	2.25945	4.55728
158	Participant_158	22	Female	15	TFMS>14	159	43.7	17.2857	24.8	9	480	320	396	1196	32		98	0.9444	1.1424	0.5714	38.6152	23.6824	62.2976	3.7474	2.3924	1.20958	0.605	1.90881	1.2076	4.29313	10.7823	3.02949	1.90895	1.99605	101	1.1389	1.3373	0.6682	39.363	21.4614	60.8244	3.1481	0.4771	1.1742	0.5867	2.22142	1.2634	3.30412	9.08328
159	Participant_159	25	Female	15	TFMS>14	162	50.6	19.2806	28.8	14	0	0	198	198	71		102	1	1.1626	0.5806	38.2591	23.4991	61.7581	3.6392	0.045	1.1626	0.5806	1.82711	1.0938	3.35711	7.24368	2.76692	1.82715	1.88391	112	1.1944	1.2737	0.6366	39.2327	20.6991	59.9318	4.307	2.1125	1.06636	0.533	1.50001	0.9468	3.0263	8.97237
160	Participant_160	25	Female	13	TFMS≤14	161	59	22.7615	34.2	6	0	0	297	297	52		97	1.0278	1.2528	0.6267	38.6942	22.509	61.2032	3.2011	0.2647	1.21896	0.609792	2.1657	1.4251	3.95951	5.7999	3.14183	2.16558	2.33698	110	1.2222	1.3248	0.6622	39.3132	20.7586	60.0718	2.6718	1.5662	1.08389	0.541759	1.788	0.9773	2.41903	6.4065
161	Participant_161	26	Male	16	TFMS>14	178	78.3	24.7128	12.7	8	2240	480	594	3314	36		110	1.1111	1.214	0.6067	40.0508	20.661	60.7119	3.8407	1.9227	1.09259	0.546019	1.97856	1.0201	2.62916	7.99138	2.72681	1.97863	1.8682	116	1.3333	1.3668	0.6834	41.1604	17.8846	59.045	2.7979	0.4097	1.02509	0.512544	1.381	0.6697	2.20333	4.60508
162	Participant_162	24	Female	11	TFMS≤14	162	89	33.9125	46	5	0	480	4158	4638	25		114	1.2778	1.3414	0.6707	38.646	22.861	61.5071	2.0592	0.3969	1.04982	0.524911	1.18721	0.7039	2.88723	4.5278	1.6216	1.18716	1.34096	122	1.5278	1.485	0.7426	39.6776	20.2503	59.928	2.4668	1.0152	0.972	0.486083	1.15485	0.6062	2.17629	4.72734
163	Participant_163	23	Male	13	TFMS≤14	173	66	22.0522	18.7	12	240	120	990	1350	45		103	1.2222	1.4154	0.7081	38.9942	21.6051	60.5994	4.3548	1.0367	1.15804	0.579314	2.05928	1.2642	4.22986	11.8625	3.40713	2.0593	2.18225	112	1.4722	1.5788	0.7895	40.4374	18.2096	58.647	4.0761	2.2389	1.07236	0.536273	1.23153	0.77	2.42127	7.89638
164	Participant_164	23	Male	14	TFMS≤14	177	65.7	20.971	15.5	7	0	0	990	990	49		100	1.0556	1.2611	0.6301	37.2395	24.4619	61.7014	3.4465	2.8043	1.19469	0.596939	2.15975	1.2487	4.02798	5.1754	2.96509	2.15969	2.09191	108	1.2778	1.4109	0.7051	39.542	20.7621	60.3042	3.609	0.423	1.10415	0.551792	2.00161	0.8907	4.10854	6.33558
165	Participant_165	20	Female	19	TFMS>14	160	50	19.5312	25.3	8	720	720	1386	2826	36		114	1.3333	1.3864	0.6929	40.7178	18.2724	58.9902	2.3527	0.7429	1.03982	0.519643	0.842545	0.4711	2.03768	5.27353	1.33158	0.842543	0.906592	123	1.6111	1.5607	0.7805	41.8514	15.891	57.7424	2.235	0.9658	0.968689	0.484426	1.01485	0.5287	1.59397	7.75156
166	Participant_166	25	Male	19	TFMS>14	172	71.7	24.2361	18.3	12	1440	0	693	2133	27		98	1.1389	1.3814	0.6906	38.3545	22.8616	61.2161	4.0456	1.1134	1.21292	0.606354	1.96954	1.1261	2.66044	7.01569	2.9917	1.9695	1.85718	111	1.3611	1.4589	0.7294	40.3902	19.1858	59.5759	2.9083	0.084	1.07182	0.535909	1.12646	0.7329	2.19781	5.6891
167	Participant_167	25	Male	17	TFMS>14	192	66.2	17.9579	7	2	7200	2880	4158	14238	25		102	1.3889	1.6175	0.8089	38.159	23.7163	61.8753	2.4587	0.09	1.1646	0.5824	1.66685	0.9604	2.629	6.01569	2.36217	1.66687	1.64907	112	1.6667	1.7797	0.8902	40.0136	20.7901	60.8037	2.5972	2.0637	1.06782	0.534091	1.16689	0.5885	2.10204	4.80132
168	Participant_168	20	Male	15	TFMS>14	177	81.6	26.0462	23.8	2	1120	1680	693	3493	29		103	1.1667	1.3526	0.6762	38.9167	21.9424	60.8591	2.4123	0.6498	1.1594	0.5796	1.81267	0.9478	3.47203	9.90776	2.39603	1.81259	1.63533	108	1.3889	1.537	0.7685	40.3069	19.318	59.6249	2.3474	0.1691	1.1066	0.553302	1.6083	0.7947	2.56557	9.86438
169	Participant_169	20	Female	15	TFMS>14	169	49	17.1563	25	9	200	200	495	895	40		101	0.9444	1.1171	0.5586	39.77	21.559	61.329	3.4819	2.8025	1.1828	0.5915	1.78169	1.0548	3.86145	8.61543	3.02793	1.7818	1.78318	106	1.1389	1.2802	0.6405	40.1369	20.2395	60.3764	3.1864	1.287	1.12404	0.562404	1.92124	1.0214	2.87641	9.186
170	Participant_170	23	Female	14	TFMS≤14	156	51	20.9566	27	5	1440	1000	693	3133	48		108	0.8056	0.8902	0.4449	37.4253	25.8323	63.2576	4.8845	1.8417	1.10509	0.552264	2.91326	1.6385	6.76948	3.87616	4.22479	2.91305	2.96682	112	0.9722	1.0373	0.5184	38.6333	23.5003	62.1336	6.0173	1.8381	1.06691	0.533182	2.18068	1.6797	7.18163	6.43311
171	Participant_171	21	Female	16	TFMS>14	155	47.6	19.8127	25.9	8	4320	1200	693	6213	26		112	1.2222	1.3036	0.6519	40.5217	18.5476	59.0692	2.5874	0.9856	1.06655	0.533364	1.25426	0.7389	1.92267	6.22776	1.51416	1.25434	1.38533	121	1.4722	1.4548	0.7275	41.8958	15.517	57.4127	1.8982	1.6371	0.988167	0.494167	1.10071	0.4758	1.95867	6.72488
172	Participant_172	21	Female	17	TFMS>14	165	50.9	18.6961	29	10	560	560	0	1120	70		113	1.3333	1.4155	0.708	40.6919	18.9416	59.6335	3.1971	0.8029	1.06164	0.531	1.317	0.7224	2.16775	7.16624	2.06931	1.31705	1.3604	122	1.6111	1.5684	0.7843	42.1674	16.0589	58.2263	2.258	0.9382	0.9735	0.486833	1.16857	0.5914	1.75467	5.44869
173	Participant_173	26	Male	13	TFMS≤14	177	82.8	26.4292	29.5	4	1440	0	297	1737	32		113	1.3333	1.4052	0.7026	39.4104	21.1454	60.5557	1.8476	0.0859	1.05393	0.526964	0.872547	0.3859	1.58791	4.61944	1.12987	0.872544	0.7323	122	1.6111	1.5792	0.7894	40.4523	18.7723	59.2246	2.3371	0.7824	0.980167	0.49	1.06172	0.5401	1.85132	4.2616
174	Participant_174	25	Female	16	TFMS>14	169	51.6	18.0666	21.8	6	600	600	693	1893	62		98	1.1944	1.4453	0.7226	39.6866	19.3526	59.0393	2.7213	3.16	1.21	0.605	1.02606	0.677	2.97657	7.88163	1.6904	1.02615	1.11901	107	1.3611	1.5163	0.7582	39.5305	19.6099	59.1403	2.2856	3.3716	1.11404	0.557019	0.952222	0.5394	2.4285	6.58749
175	Participant_175	28	Male	10	TFMS≤14	184	87.2	25.7561	18.9	8	960	0	693	1653	47		96	0.8889	1.0975	0.5489	37.6012	25.4351	63.0364	4.1053	1.7102	1.23468	0.617553	2.74964	1.6595	6.12746	4.56338	4.11762	2.74964	2.68723	103	1.0556	1.2162	0.6078	38.853	23.7236	62.5766	5.202	3.7488	1.15216	0.575784	3.4731	1.9387	5.45595	5.6408
176	Participant_176	25	Female	15	TFMS>14	165	64.7	23.7649	36.3	18	320	360	1386	2066	59		108	1.3333	1.4782	0.7391	39.5337	20.1327	59.6664	3.6823	2.0031	1.10868	0.55434	1.34629	0.7007	2.34306	7.52209	1.73498	1.34628	1.26395	119	1.6111	1.6056	0.8026	40.7439	17.5087	58.2526	3.0463	2.433	0.996552	0.49819	1.02992	0.6545	2.03515	6.72237
177	Participant_177	23	Female	14	TFMS≤14	173	67.3	22.4866	34.4	6	240	400	594	1234	37		111	1.3333	1.4325	0.7161	40.9883	17.4818	58.4701	2.7839	1.3126	1.07436	0.537091	1.95849	1.1269	3.32119	7.37338	2.42072	1.95859	2.09817	121	1.6111	1.5875	0.7937	42.3884	14.7835	57.1719	2.4032	1.0322	0.985333	0.492667	1.35485	0.6018	2.03711	8.58863
178	Participant_178	23	Male	18	TFMS>14	171	73.6	25.1701	19.9	8	960	160	693	1813	38		100	1.1389	1.3678	0.684	38.7256	23.0416	61.7672	2.2894	1.2807	1.20102	0.600612	1.45922	0.8058	2.56239	3.95893	1.72065	1.45917	1.34163	108	1.3611	1.507	0.7535	40.3715	20.075	60.4465	3.3536	2.047	1.10717	0.553585	0.772314	0.4491	1.7069	4.60423
179	Participant_179	24	Female	10	TFMS≤14	162	66	25.1486	28.2	6	720	0	198	918	49		114	1.4444	1.5115	0.7559	41.8259	18.5154	60.3413	2.781	5.3206	1.04643	0.523304	1.40388	0.7025	2.1666	7.53913	1.78352	1.40389	1.34248	125	1.7222	1.645	0.8225	43.026	15.4002	58.4262	2.4702	3.4335	0.955161	0.477581	1.15518	0.4979	1.70641	6.53368
180	Participant_180	22	Female	14	TFMS≤14	162	66	25.1486	33.1	0	0	0	5544	5544	40		110	1.2778	1.3923	0.696	39.0721	21.6349	60.707	4.4567	0.5639	1.08963	0.544722	1.18437	0.6193	1.81664	5.87384	1.71908	1.18431	1.13684	117	1.5278	1.5575	0.7785	40.7238	17.6391	58.3629	5.2466	2.2178	1.01948	0.509569	1.18644	0.6714	1.83775	6.00087
181	Participant_181	23	Female	14	TFMS≤14	162	51.6	19.6616	29.9	8	0	0	594	594	37		105	1.0833	1.2352	0.6185	38.5211	23.0439	61.5649	3.7347	0.2193	1.1402	0.570882	2.73781	1.8727	3.73691	7.54473	3.40437	2.73781	3.28033	115	1.3056	1.3507	0.6753	40.0543	19.4336	59.4879	4.3513	1.1366	1.03456	0.517281	1.34368	1.0047	2.95848	8.16112
182	Participant_182	21	Female	13	TFMS≤14	158	53.6	21.4709	24.3	8	0	0	495	495	32		103	0.9444	1.0902	0.5449	38.3727	23.3226	61.6953	4.9053	0.1772	1.15431	0.576961	2.29672	1.3139	4.95795	5.6859	2.89439	2.2969	2.27722	119	1.1389	1.1441	0.5721	37.7763	24.3631	62.1394	3.1335	0.2231	1.00458	0.502288	1.35083	0.7267	2.64372	6.47249
183	Participant_183	25	Male	11	TFMS≤14	172	52	17.5771	17.1	6	0	0	198	198	26		108	1	1.1004	0.55	39.5576	21.3477	60.9053	3.6932	1.1561	1.10038	0.55	2.41385	1.3175	4.3261	7.59286	3.42762	2.41386	2.39549	118	1.1944	1.2124	0.6063	40.6319	19.3647	59.9966	3.7172	1.5589	1.015	0.507586	1.80401	0.9109	3.2093	7.70474
184	Participant_184	25	Male	8	TFMS≤14	177	75	23.9395	19.1	11	1600	160	297	2057	46		103	1.0833	1.2612	0.6308	41.1957	19.1376	60.3333	4.0352	3.7929	1.1642	0.5823	1.76942	1.2337	4.03149	11.4978	3.18928	1.76946	2.11872	110	1.3056	1.426	0.7126	41.3021	18.5826	59.8847	2.576	2.9157	1.09222	0.545833	1.27877	0.7683	2.21829	6.35326
185	Participant_185	24	Male	15	TFMS>14	177	89.2	28.472	24.5	11	800	240	1188	2228	25		114	1.3333	1.3919	0.696	38.9497	21.69	60.6398	2.6834	1.0301	1.04393	0.521964	1.05053	0.6027	1.89629	5.53988	1.49192	1.05058	1.1546	123	1.6111	1.5623	0.7809	40.4057	18.2249	58.6306	2.809	2.3569	0.969672	0.484672	1.08826	0.5422	1.92795	5.13583
186	Participant_186	24	Male	13	TFMS≤14	173	70.7	23.6226	24.4	18	2000	0	1386	3386	62		93	0.8333	1.0669	0.5333	38.1219	23.2637	61.3856	4.872	1.2835	1.28022	0.64	3.32367	2.0747	6.15473	7.75758	4.20946	3.32394	3.2417	97	1	1.2256	0.613	38.2458	23.1854	61.4312	4.0082	0.8409	1.22562	0.613021	2.1773	1.5637	4.32361	9.99293
187	Participant_187	24	Male	12	TFMS≤14	172	83.6	28.2585	31.8	3	0	200	693	893	24		99	1.1389	1.3757	0.6877	38.7903	21.507	60.2973	4.113	2.3247	1.20796	0.603878	1.92877	1.1835	4.06777	10.3115	3.14939	1.92866	1.95983	107	1.3611	1.5178	0.7586	39.7631	19.7293	59.4924	2.6834	1.855	1.11509	0.557358	2.01367	0.9547	3.31136	5.21002
188	Participant_188	25	Female	17	TFMS>14	158	49	19.6283	28.8	6	0	360	396	756	55		97	1.0278	1.264	0.6314	38.8955	22.3954	61.2909	5.9117	0.4802	1.22979	0.614375	2.74489	1.46	6.30484	9.51401	4.89045	2.74495	2.37635	104	1.2222	1.4053	0.7025	39.8022	19.6282	59.4304	4.5089	1.9097	1.1498	0.574804	2.03416	1.2405	3.16967	9.09457
189	Participant_189	28	Female	15	TFMS>14	171	54	18.4672	22.4	7	480	0	594	1074	40		114	1.4167	1.4847	0.7422	41.0973	18.6062	59.7035	3.6346	1.8923	1.04804	0.523929	1.58664	0.8058	2.55443	9.89993	2.25732	1.58661	1.5379	125	1.6944	1.6291	0.8144	42.0399	16.4234	58.4633	2.7528	1.2044	0.961452	0.480645	1.23697	0.6381	1.68459	6.29529
190	Participant_190	29	Female	15	TFMS>14	171	67	22.913	26.8	10	3840	2880	693	7413	41		112	1.3333	1.4255	0.713	39.5578	20.5612	60.119	2.106	0.8135	1.06909	0.534727	1.48445	0.7712	2.87908	4.1982	1.80708	1.48457	1.44218	121	1.6111	1.6012	0.8006	40.6842	18.0949	58.7791	2.0312	1.3104	0.993833	0.496917	0.736928	0.4291	1.97497	5.66237
191	Participant_191	26	Female	13	TFMS≤14	169	60.1	21.0427	31.5	10	0	0	396	396	43		95	0.8889	1.1196	0.56	37.7114	24.9223	62.6338	4.6942	1.1244	1.25957	0.63	2.55372	1.4257	4.99928	8.08914	4.29225	2.55366	2.26302	102	1.0556	1.2299	0.615	38.7745	22.4168	61.1912	3.856	0.0885	1.1652	0.5826	1.77759	1.1968	4.24377	10.3141
192	Participant_192	24	Male	17	TFMS>14	164	56.5	21.0068	15.1	9	0	0	495	495	33		101	1.2222	1.4449	0.7226	39.9932	20.0305	60.0237	2.4841	0.0423	1.1822	0.5912	1.18769	0.7386	2.45192	5.13417	1.56138	1.18773	1.2494	107	1.4722	1.6406	0.8204	41.6864	16.661	58.3474	3.2732	0.0813	1.11434	0.557264	0.914315	0.4405	1.89678	6.74929
193	Participant_193	22	Female	16	TFMS>14	160	54	21.0937	26.6	11	1920	240	297	2457	39		118	1.3056	1.3274	0.6639	41.1735	16.9917	58.1652	2.2725	1.5935	1.01672	0.508534	1.21688	0.6433	2.03942	8.4506	1.92744	1.21683	1.26506	125	1.5556	1.4805	0.7406	41.6201	15.8109	57.4309	2.2914	2.2545	0.951774	0.476129	1.07626	0.5034	1.99423	7.13305
194	Participant_194	21	Female	17	TFMS>14	165	54.1	19.8714	21	0	1000	320	792	2112	22		100	1.2778	1.5255	0.7628	38.2393	23.0427	61.2821	2.7213	1.2439	1.19388	0.596939	1.26431	0.6912	3.15016	4.81194	1.95995	1.26426	1.15786	111	1.5278	1.6419	0.8208	39.435	20.5887	60.0237	3.3373	1.3635	1.07473	0.537273	1.41791	0.7374	2.75643	6.68231
195	Participant_195	23	Female	15	TFMS>14	155	58	24.1415	34.5	0	0	0	6930	6930	34		110	1.1111	1.2084	0.6043	38.7536	22.7993	61.5529	2.4639	0.794	1.08759	0.543889	1.70591	0.9313	2.64672	4.4168	2.26358	1.70585	1.71226	119	1.3333	1.3358	0.6678	39.7733	19.4891	59.2624	2.8285	2.3956	1.00186	0.500847	1.25285	0.5977	2.21103	4.94122
196	Participant_196	23	Male	14	TFMS≤14	176	74.5	24.0509	20.7	8	1920	480	693	3093	31		119	1.1667	1.1647	0.5822	40.6112	19.1681	59.7793	2.3801	0.9662	0.998305	0.499068	1.27979	0.6343	2.23584	6.89009	1.72702	1.27978	1.27095	124	1.3889	1.3404	0.6704	41.3284	17.4282	58.7566	2.5641	0.1619	0.965082	0.482705	1.4118	0.687	2.23817	7.31057
197	Participant_197	22	Female	15	TFMS>14	165	73.2	26.8871	41.3	4	0	0	1386	1386	60		110	1.1389	1.2264	0.613	40.086	22.0292	62.1152	3.7485	5.6316	1.07685	0.538241	1.93996	1.0145	3.17542	8.26085	2.47218	1.9399	1.88486	120	1.3611	1.3533	0.6767	40.8115	19.8432	60.6546	2.4356	3.6584	0.994237	0.497203	1.24503	0.7027	1.9247	4.98206
198	Participant_198	21	Female	14	TFMS≤14	163	60.4	22.7333	38.7	14	0	0	396	396	75		96	1.0833	1.3551	0.6775	40.2279	19.238	59.4659	3.526	0.7582	1.25085	0.625426	1.80518	1.0097	4.81333	6.28964	3.3552	1.80528	1.6144	109	1.3056	1.4318	0.7156	40.9828	18.0851	59.0679	2.7511	0.1237	1.09667	0.548148	1.4039	0.6184	2.67356	5.18604
199	Participant_199	23	Male	13	TFMS≤14	180	70	21.6049	14.2	12	240	0	1386	1626	11		102	1.1389	1.3364	0.6689	39.9352	20.7431	60.6784	3.4561	1.5484	1.1734	0.5873	2.15329	1.2215	3.94364	9.27875	2.39954	2.15335	2.07989	107	1.3611	1.5121	0.7563	41.1005	18.5632	59.6637	2.8701	1.877	1.11094	0.55566	1.80253	0.9165	3.30653	7.26707
200	Participant_200	21	Male	9	TFMS≤14	182	73.4	22.1592	13.3	12	0	280	693	973	41		105	1.3333	1.518	0.759	40.0507	20.1858	60.2365	3.8412	0.7196	1.13846	0.569231	1.7599	0.9527	3.36623	4.60769	2.82603	1.76	1.67358	112	1.6111	1.718	0.8589	40.6479	18.6019	59.2498	2.9836	0.2514	1.06636	0.533091	1.28166	0.7038	2.53592	7.58632
201	Participant_201	21	Female	10	TFMS≤14	159	44.1	17.4439	28.6	8	0	0	99	99	32		106	1.1667	1.3031	0.6515	38.8602	21.3843	60.2445	3.1658	2.2347	1.11692	0.558462	1.54614	0.8855	3.03884	7.43115	2.01562	1.54614	1.58552	115	1.3889	1.4408	0.7203	40.0135	18.9413	58.9548	3.9153	2.5455	1.03737	0.518596	1.86366	0.9307	3.4121	6.37021
202	Participant_202	24	Male	12	TFMS≤14	171	79	27.0169	27.5	0	2880	360	495	3735	0		98	1.1389	1.3864	0.6933	36.6764	25.1754	61.8518	5.0134	3.9346	1.21729	0.60875	1.79617	1.0777	4.29268	8.97344	3.67443	1.79621	1.77037	109	1.3611	1.4916	0.7459	38.3437	22.6584	61.0021	3.5078	1.6168	1.09585	0.548019	1.37798	0.6753	2.3485	6.8981
203	Participant_203	24	Female	16	TFMS>14	156	47	19.313	29.7	5	560	280	396	1236	7		108	1.1667	1.2862	0.6434	39.1409	21.1706	60.3115	3.4095	1.4493	1.10245	0.551509	1.63322	0.9546	2.78098	6.28702	2.31415	1.63316	1.73081	117	1.3889	1.4167	0.7082	40.8722	17.6978	58.57	3.39	1.3555	1.02	0.509914	2.21477	1.1044	3.08841	7.81114
204	Participant_204	25	Male	16	TFMS>14	177	71	22.6627	12.9	11	2240	240	495	2975	20		100	1.1389	1.3525	0.6762	37.4979	24.0935	61.5913	3.5602	2.2622	1.18755	0.593776	1.3666	0.9177	3.36899	5.48696	2.0485	1.36662	1.54551	110	1.3611	1.4768	0.7383	38.9145	21.3688	60.2833	2.8047	2.0404	1.085	0.542407	0.70396	0.4382	1.8939	4.32593
205	Participant_205	24	Male	12	TFMS≤14	181	86	26.2507	21.3	9	4800	360	297	5457	9		113	1.3333	1.4076	0.7039	39.7158	18.9107	58.6265	4.5883	4.089	1.05571	0.527946	1.76173	0.8903	2.76867	9.15725	2.42689	1.76174	1.68636	122	1.6111	1.5789	0.7896	40.8673	16.5306	57.398	4.0884	4.2082	0.98	0.490083	1.34345	0.559	1.96906	6.51519
206	Participant_206	20	Male	13	TFMS≤14	181	73.6	22.4657	16	9	0	0	396	396	21		103	1.1389	1.3189	0.6596	39.5022	22.2486	61.7508	3.7381	3.2233	1.15804	0.579118	1.826	1.0228	2.69226	8.70212	2.82085	1.82598	1.76615	99	1.3611	1.6431	0.8222	41.5892	18.377	59.9662	5.2468	3.8116	1.20714	0.604082	3.15768	1.8313	7.33484	9.81281
207	Participant_207	20	Male	17	TFMS>14	177	78.2	24.9609	19.4	1	0	240	396	636	4		103	1.0556	1.2261	0.613	37.2762	26.2741	63.5503	3.2202	2.3822	1.1616	0.5807	1.95081	1.1917	3.40405	4.5189	2.997	1.95069	2.05214	106	1.2778	1.4319	0.7157	38.8879	23.2538	62.1418	2.4149	2.6774	1.12058	0.560096	1.50973	0.8576	2.33003	5.98827
208	Participant_208	24	Female	9	TFMS≤14	161	48.6	18.7493	21.7	21	0	0	1980	1980	63		106	1.1389	1.2843	0.6419	39.5975	21.47	61.0675	4.2621	1.6939	1.12769	0.563654	2.64103	0.9762	4.08056	6.35072	3.33795	2.64099	1.73197	122	1.3611	1.3378	0.6685	40.8343	18.5688	59.4031	3.2598	0.5831	0.982833	0.491167	2.41545	1.2089	3.2076	8.02583
209	Participant_209	24	Female	14	TFMS≤14	160	52.3	20.4297	26.5	19	0	180	594	774	49		96	0.9444	1.1719	0.5858	36.917	25.3429	62.2599	3.4679	2.205	1.24085	0.620213	1.75011	1.0816	4.35138	8.00895	2.63958	1.75015	1.74384	108	1.1389	1.2541	0.627	37.7656	23.5949	61.3605	2.6517	2.2876	1.10113	0.550566	1.29229	0.6491	2.02089	4.90487
210	Participant_210	25	Male	16	TFMS>14	171	71.8	24.5546	20.2	10	960	720	693	2373	3		108	1.3333	1.4752	0.7377	40.5184	19.1508	59.6692	2.6206	0.464	1.10642	0.553302	1.79985	0.995	2.70075	6.95846	2.21974	1.7999	1.7983	123	1.5	1.4535	0.7268	41.2959	17.1037	58.3996	2.5912	0.7347	0.969016	0.484508	1.1775	0.6383	1.78056	6.3039
211	Participant_211	25	Male	15	TFMS>14	174	93.4	30.8495	25.6	17	480	320	396	1196	39		94	1.1389	1.4372	0.7189	37.7606	24.2894	62.05	2.562	0.5006	1.26196	0.631196	1.28653	0.7237	2.60271	4.79633	2.04045	1.28646	1.14656	102	1.3611	1.6048	0.8021	39.1518	21.5437	60.6955	1.6314	0.3892	1.179	0.5893	0.724653	0.4473	1.64411	6.08763
212	Participant_212	20	Female	13	TFMS≤14	172	73	24.6755	30.1	6	840	200	2079	3119	8		107	1.1944	1.3364	0.668	38.4486	22.2934	60.742	3.2613	2.0834	1.11887	0.559245	1.61625	0.9336	2.96734	4.80546	2.53762	1.61625	1.66945	114	1.4444	1.5185	0.7591	40.2072	18.9061	59.1133	2.1894	1.6758	1.05125	0.525536	1.06439	0.506	1.84992	4.58741
213	Participant_213	23	Male	18	TFMS>14	171	68	23.255	10.8	14	0	360	693	1053	14		93	1	1.2818	0.6416	37.0319	22.6248	59.6567	6.9107	8.5064	1.28178	0.641556	2.93884	2.0839	5.29786	16.2998	5.7157	2.93891	3.24813	102	1.1944	1.3987	0.6995	38.1383	21.5371	59.6755	4.6378	5.5739	1.171	0.5856	1.96405	1.1689	3.65617	5.19476
214	Participant_214	23	Male	16	TFMS>14	184	85.8	25.3426	14.6	10	960	0	693	1653	40		97	1.1111	1.366	0.6829	36.4853	25.6058	62.0912	3.2133	3.8274	1.22938	0.614583	1.77589	0.94	4.11097	10.2707	2.94647	1.77596	1.52956	102	1.3333	1.5515	0.7757	37.6246	23.4273	61.0519	3.6273	3.4571	1.1636	0.5818	1.60091	1.0666	3.73187	8.7398
215	Participant_215	20	Female	14	TFMS≤14	159	48.3	19.1053	26.8	13	0	0	2541	2541	33		114	1.1389	1.1875	0.5938	39.6301	21.031	60.6611	3.2215	0.6393	1.04268	0.521429	2.03036	1.0208	2.8655	9.33241	2.73816	2.03037	1.95775	117	1.3611	1.3818	0.691	40.7269	18.8519	59.5788	2.3717	0.7535	1.01517	0.507672	1.40789	0.7669	2.06694	5.52411
216	Participant_216	20	Female	12	TFMS≤14	150	72.3	32.1333	45.3	18	0	0	495	495	24		114	1.1389	1.1883	0.5941	39.4147	21.9066	61.3212	3.2666	1.8848	1.04339	0.521607	1.32206	0.7265	2.03782	6.30586	2.16809	1.32204	1.39273	125	1.3611	1.3005	0.6502	40.7664	19.0581	59.8244	2.734	1.4599	0.955484	0.477661	1.43991	0.6458	2.58497	3.90123
217	Participant_217	25	Male	17	TFMS>14	178	77	24.3025	14.4	10	4800	240	297	5337	21		105	1.3333	1.5148	0.7571	38.8678	22.3334	61.2012	2.9279	0	1.13608	0.567843	1.55	0.898	2.8988	6.51356	1.92398	1.55007	1.58144	117	1.6111	1.6383	0.8194	39.7762	20.295	60.0712	3.4865	0.3829	1.0169	0.508621	1.17221	0.6002	1.81842	4.9017
218	Participant_218	24	Male	16	TFMS>14	174	76.2	25.1685	21.5	10	480	140	396	1016	8		101	1.1389	1.3382	0.6691	38.6894	23.0638	61.7532	2.0847	1.1505	1.175	0.5875	1.59899	1.0112	2.59554	7.21607	2.33899	1.599	1.72117	110	1.3611	1.4652	0.7326	40.2718	20.0241	60.2959	3.9841	1.3514	1.07648	0.538241	1.43198	0.7944	2.34879	4.77325
219	Participant_219	24	Male	15	TFMS>14	171	64.3	21.9897	21.1	4	960	480	990	2430	0		108	1.3333	1.478	0.739	40.2723	19.9149	60.1872	2.2936	1.1477	1.10849	0.554245	1.24399	0.7672	2.60179	6.31035	1.89243	1.24407	1.38428	118	1.6111	1.6294	0.8149	41.7491	17.0133	58.7624	2.1156	1.2326	1.01138	0.505776	1.61585	0.8398	2.08819	6.79527
220	Participant_220	24	Male	16	TFMS>14	182	85.6	25.8423	18.3	8	2880	900	693	4473	19		94	1	1.2724	0.6359	36.9725	27.8319	64.8044	4.2184	4.9252	1.27239	0.63587	4.0745	2.8136	6.99763	11.2522	4.79088	4.07451	4.4248	103	1.1944	1.3858	0.6931	38.4654	25.1479	63.6133	3.1135	5.5557	1.1602	0.580294	1.2599	0.8598	3.0001	5.14596
221	Participant_221	25	Male	13	TFMS≤14	182	93	28.0763	19.5	6	4320	960	990	6270	5		111	1.4167	1.5182	0.7589	39.8202	19.9695	59.7896	2.5384	0.9752	1.07164	0.535727	1.74134	0.8443	2.0904	4.53942	2.13599	1.74135	1.57605	118	1.6944	1.7061	0.8534	40.9589	17.5171	58.476	1.8011	1.3472	1.0069	0.503621	1.3325	0.6144	1.6541	6.5947
222	Participant_222	23	Male	12	TFMS≤14	179	73	22.7833	19.7	8	480	0	1980	2460	15		104	1.3333	1.532	0.7658	39.5734	21.314	60.8874	2.8167	1.1711	1.14902	0.574314	1.61911	1.0147	3.40683	5.52595	2.51842	1.61909	1.76679	113	1.6111	1.7029	0.8514	40.7839	18.6518	59.4357	2.5621	0.54	1.05696	0.528482	1.15764	0.5584	2.1072	5.03705
223	Participant_223	20	Male	14	TFMS≤14	183	83	24.7843	21.5	2	1200	2880	594	4674	1		109	1.3889	1.5283	0.7644	39.7119	20.9191	60.631	2.921	0.9362	1.10038	0.550377	1.43379	0.8733	2.99885	5.37404	2.06099	1.43378	1.58681	117	1.6667	1.7089	0.8546	40.7769	18.9675	59.7444	2.6124	1.2866	1.02534	0.512759	1.24449	0.6511	2.10953	7.00356
224	Participant_224	20	Male	16	TFMS>14	176	58	18.7242	12.5	3	0	600	693	1293	3		104	1	1.1486	0.574	37.7262	22.9259	60.6521	6.6749	4.3447	1.14863	0.57402	2.926	1.6949	4.83007	10.4611	3.85856	2.92591	2.95272	111	1.1944	1.2757	0.6376	38.9513	20.9397	59.891	5.524	2.9287	1.068	0.533818	1.77105	0.884	3.08077	5.71355
225	Participant_225	20	Female	10	TFMS≤14	160	49.3	19.2578	27.2	18	0	0	198	198	29		89	0.9167	1.2277	0.6137	38.5831	24.5008	63.0839	6.3029	4.5913	1.3393	0.669535	2.3961	1.6629	6.72445	12.611	4.17825	2.39601	2.48368	97	1.1111	1.3624	0.6816	39.3198	22.3321	61.6519	4.0485	2.493	1.22617	0.613404	1.9874	1.3173	3.95857	10.0577
226	Participant_226	20	Female	16	TFMS>14	161	47	18.132	29.9	14	0	0	198	198	37		105	1.0833	1.2338	0.6167	39.1422	21.074	60.2161	2.8598	1.6261	1.13885	0.569231	1.66639	0.9219	3.37385	9.39879	2.67271	1.66651	1.61951	114	1.3056	1.3687	0.6844	40.6745	17.9867	58.6612	2.9188	1.62	1.04839	0.524196	1.13695	0.5959	2.2004	7.82245
227	Participant_227	24	Female	13	TFMS≤14	171	57	19.4932	32.2	19	0	120	297	417	61		101	1	1.1818	0.5904	37.8744	23.6757	61.5502	3.5159	1.5078	1.1818	0.5904	2.04265	1.3448	5.13487	9.38726	2.49195	2.04268	2.27773	105	1.1944	1.3607	0.6806	38.7091	21.6179	60.327	2.8983	2.3683	1.13922	0.569804	1.59168	0.8399	3.44157	7.93093
228	Participant_228	24	Male	16	TFMS>14	170	69.5	24.0484	17.7	3	1920	0	693	2613	6		101	1.1667	1.3753	0.6878	39.3112	20.9874	60.2986	3.2827	0.9878	1.1788	0.5895	2.02631	1.2217	3.24208	5.54094	2.67087	2.02633	2.0724	110	1.3889	1.5129	0.7564	40.3604	18.8711	59.2316	2.3359	1.0059	1.08926	0.54463	1.19639	0.7382	2.60998	4.96103
229	Participant_229	25	Male	14	TFMS≤14	173	68.8	22.9877	11.5	0	2400	480	2970	5850	0		101	1	1.1792	0.5896	37.6255	26.0125	63.6379	5.1181	3.3497	1.17918	0.589592	1.71192	1.0343	4.79356	5.34666	3.52039	1.71192	1.75425	110	1.1944	1.2971	0.6485	38.6085	23.3288	61.9372	3.4266	1.5281	1.08593	0.542963	1.51945	0.9155	3.88852	9.29666
230	Participant_230	20	Female	16	TFMS>14	165	64.8	23.8017	30.8	7	0	1440	396	1836	0		103	1.1389	1.3158	0.6579	38.9172	22.7088	61.6259	3.1185	1.4054	1.15529	0.577647	1.68256	1.113	3.05135	6.14079	2.27275	1.68256	1.92676	113	1.3611	1.4328	0.7164	40.916	18.4733	59.3893	2.5686	0.7491	1.05268	0.526339	1.33735	0.6714	2.39368	5.30766
231	Participant_231	21	Female	16	TFMS>14	164	50.3	18.7017	22.3	11	0	120	297	417	29		108	1.1389	1.256	0.6278	39.1104	21.3858	60.4962	4.4833	0.9827	1.10283	0.551226	2.56697	1.3698	4.44358	9.63162	3.31194	2.56698	2.48508	119	1.3611	1.3667	0.6833	41.2559	17.6739	58.9298	2.9876	0.4511	1.00407	0.502034	1.66156	0.7872	2.75839	9.80542
232	Participant_232	23	Female	15	TFMS>14	173	59.3	19.8136	27.1	19	0	0	594	594	29		109	1.1389	1.2474	0.6231	39.8622	21.1197	60.9819	4.4533	2.1442	1.09528	0.547075	2.84113	1.5795	4.24688	7.18618	4.16993	2.84108	2.88708	117	1.3611	1.3933	0.6969	40.6771	18.73	59.4071	3.2675	0.2073	1.02362	0.511983	2.69494	1.3581	3.61481	8.47891
233	Participant_233	23	Female	17	TFMS>14	166	57.1	20.7214	30.4	3	0	120	495	615	18		100	1.1389	1.3557	0.678	39.7566	20.9498	60.7063	2.8386	1.275	1.19041	0.595306	2.28939	1.3187	5.04067	11.508	3.27396	2.28932	2.2151	109	1.3611	1.4841	0.7419	41.1175	17.8499	58.9674	2.6676	0.2067	1.09037	0.545093	1.51793	0.7905	2.9136	5.77706
234	Participant_234	21	Female	14	TFMS≤14	157	55.8	22.6378	27.6	6	0	0	693	693	19		105	1	1.1424	0.5709	37.4528	24.8541	62.3069	2.6847	0.5826	1.14235	0.570882	1.677	1.0228	3.55915	7.26238	2.37213	1.67703	1.79163	112	1.1944	1.2696	0.6349	38.2997	22.8019	61.1016	2.5242	1.4802	1.06291	0.531545	1.46487	0.7738	3.09637	5.79206
235	Participant_235	22	Male	11	TFMS≤14	170	68.5	23.7024	24	15	0	0	396	396	27		100	1.2222	1.4604	0.7302	40.2733	21.0418	61.3151	3.3128	4.0239	1.1949	0.597449	1.47519	1.0552	3.80823	8.6946	3.19073	1.47517	1.76621	110	1.4722	1.5957	0.798	41.1926	19.8018	60.9944	3.4104	5.4551	1.08389	0.542037	1.50052	0.9205	3.4698	9.65619
236	Participant_236	23	Female	16	TFMS>14	162	57.5	21.9098	40.4	5	0	0	1980	1980	6		104	1.0833	1.2454	0.6226	39.4678	21.286	60.7539	5.0141	0.5634	1.14961	0.574706	1.94853	1.122	5.44951	7.52091	3.8893	1.94857	1.95234	111	1.3056	1.3972	0.6987	40.1631	20.2514	60.4145	3.7639	1.4487	1.07018	0.535182	1.27869	0.8685	3.75345	10.1
237	Participant_237	26	Male	15	TFMS>14	165	60	22.0386	17	11	2880	2160	693	5733	4		104	1.1944	1.3739	0.6873	40.1125	18.3259	58.4385	3.0196	3.5487	1.1502	0.575392	1.94387	0.7973	3.38523	10.9053	2.45095	1.94399	1.3857	111	1.4444	1.5469	0.7733	41.1885	15.9083	57.0968	3.0198	4.0789	1.07091	0.535364	1.4275	0.7062	2.52206	10.2393
238	Participant_238	27	Male	17	TFMS>14	170	70.4	24.3599	15.6	20	5760	2880	1386	10026	17		114	1.4722	1.5529	0.7762	39.3262	20.4842	59.8104	2.2714	2.1717	1.05482	0.527232	1.26676	0.5421	1.98087	3.98746	1.35077	1.26675	1.02829	121	1.7778	1.7396	0.8696	40.402	18.123	58.525	2.2664	2.6213	0.9785	0.489167	1.36891	0.5928	1.77714	4.37566
239	Participant_239	22	Female	15	TFMS>14	167	54	19.3625	25.7	7	0	0	495	495	25		110	1.3333	1.4378	0.719	39.3783	22.3081	61.6864	2.9055	2.6043	1.07833	0.539259	2.5033	1.4221	3.80793	5.74948	2.85492	2.50336	2.63708	117	1.6111	1.6492	0.8249	40.795	19.0669	59.8619	2.5026	1.6233	1.02362	0.511983	1.8562	0.9691	2.78049	7.92683
240	Participant_240	22	Male	12	TFMS≤14	177	81	25.8546	20.3	8	0	120	297	417	18		88	0.9444	1.2897	0.6449	38.5729	24.3529	62.9257	3.4958	3.9627	1.36558	0.682791	2.12642	1.5563	3.8623	10.1011	3.86837	2.1265	2.27935	96	1.1389	1.421	0.7105	39.8533	21.8622	61.7156	3.7531	4.0163	1.24766	0.62383	2.45348	1.6606	6.3543	19.1454
241	Participant_241	20	Female	15	TFMS>14	160	52	20.3125	25.5	2	0	0	594	594	12		89	0.75	1.002	0.5016	39.2515	22.4891	61.7406	5.8809	2.853	1.33605	0.668837	2.23181	1.4896	5.3919	8.19108	3.78438	2.23169	2.22721	96	0.8889	1.1034	0.5517	39.7326	21.1004	60.833	4.5137	1.4339	1.24128	0.620638	2.03269	1.1233	4.18926	14.0192
242	Participant_242	22	Female	16	TFMS>14	156	46	18.902	30.3	17	0	0	495	495	22		104	1.0556	1.2166	0.6083	38.0742	24.1749	62.2491	3.2384	0.8526	1.15255	0.576275	1.56388	1.0041	3.62765	4.48813	2.17738	1.56386	1.74243	116	1.2778	1.3054	0.6526	40.2198	20.316	60.5358	3.075	1.9912	1.02158	0.510702	1.63782	0.8348	3.13403	4.98917
243	Participant_243	21	Female	17	TFMS>14	153	52	22.2137	29.3	14	0	240	1386	1626	54		107	1.1389	1.2769	0.6389	38.4734	22.8645	61.3379	3.3643	0.4798	1.12115	0.560962	1.95296	1.1395	3.60561	4.45931	2.34113	1.953	2.03131	114	1.3611	1.4265	0.7126	40.1431	19.6286	59.7717	2.0212	0.212	1.04804	0.523571	2.17442	1.0679	1.93284	10.8439
244	Participant_244	22	Female	17	TFMS>14	166	64	23.2254	26.5	5	0	140	396	536	14		101	1.1111	1.3122	0.6559	40.7113	18.5605	59.2718	3.8162	0.0416	1.181	0.5903	1.67859	1.0218	2.98173	5.88616	2.61372	1.67859	1.731	106	1.3333	1.4936	0.7467	42.2318	15.5708	57.8026	3.5539	0.1197	1.12019	0.56	2.07502	0.9952	3.39791	7.05937
245	Participant_245	20	Male	15	TFMS>14	173	61	20.3816	12.6	10	0	1920	1386	3306	39		97	1.0278	1.2699	0.6355	37.2309	25.1248	62.3558	2.7026	1.1264	1.23553	0.618298	2.21375	1.2602	4.46699	5.91806	3.48468	2.21377	2.03814	105	1.2222	1.3823	0.691	38.8879	22.6322	61.5201	2.4883	1.055	1.13096	0.565385	1.53396	0.8979	3.24831	5.6994
246	Participant_246	22	Male	14	TFMS≤14	172	78.1	26.3994	23.3	4	560	0	396	956	5		109	1.3333	1.4568	0.7283	39.2034	21.9492	61.1525	3.2141	0.9121	1.09259	0.546204	1.29651	0.7197	2.586	6.76289	1.7543	1.29659	1.31758	118	1.6111	1.6367	0.8182	40.1901	19.7047	59.8948	2.5418	0.1663	1.01586	0.507845	1.05061	0.501	1.47126	5.37181
247	Participant_247	24	Male	13	TFMS≤14	189	89.4	25.0273	8.6	9	5760	0	594	6354	10		103	1.3333	1.5501	0.7752	40.1342	20.9874	61.1216	2.4701	3.2034	1.1626	0.5814	1.45776	0.8605	2.57063	4.46982	1.83389	1.45778	1.47999	111	1.6111	1.728	0.8637	41.5494	17.9522	59.5016	2.2945	2.5621	1.07255	0.536091	1.52131	0.8404	2.18968	6.73622
248	Participant_248	25	Female	16	TFMS>14	159	47.4	18.7493	27.9	10	480	0	594	1074	9		108	1.2222	1.3398	0.6697	40.8778	17.5215	58.3993	2.559	1.762	1.09623	0.547925	1.983	1.0207	3.04493	6.20837	2.43273	1.98301	1.86285	112	1.4722	1.5576	0.7787	41.6738	14.951	56.6248	3.3755	4.0498	1.058	0.528909	1.18742	0.6007	2.38975	9.29369
249	Participant_249	27	Male	9	TFMS≤14	169	82.7	28.9556	31.5	8	2160	1080	693	3933	28		104	0.9444	1.0915	0.5457	37.2582	26.7051	63.9634	3.7938	3.3336	1.15569	0.577843	1.98527	1.1473	4.09682	8.2913	2.33415	1.98543	1.98544	107	1.1389	1.276	0.6379	38.2115	24.6042	62.8158	3.5193	2.7252	1.12038	0.560094	2.3517	1.3264	3.83994	8.1482
250	Participant_250	26	Male	15	TFMS>14	174	72.8	24.0454	14.3	6	2160	720	1980	4860	2		111	1.3333	1.4286	0.7141	39.6912	19.362	59.0531	2.7015	3.1147	1.07145	0.535545	1.51455	0.6787	2.79533	5.67658	2.22444	1.51456	1.26734	119	1.6111	1.6218	0.8112	40.815	17.2756	58.0906	2.9204	2.6462	1.00661	0.503475	1.33921	0.6843	1.98113	4.88608
251	Participant_251	24	Female	11	TFMS≤14	161	67.5	26.0407	34.8	6	320	0	297	617	14		104	0.9444	1.0863	0.5432	38.5782	24.9574	63.5356	3.1361	5.6353	1.1502	0.575196	1.96661	1.2206	3.87421	4.91037	2.41109	1.96674	2.12202	113	1.1389	1.2056	0.6028	39.8785	21.7105	61.5891	2.4162	3.7496	1.05857	0.529286	1.28032	0.6369	2.35591	4.48032
252	Participant_252	24	Female	13	TFMS≤14	168	83.1	29.443	42.3	12	960	160	495	1615	36		117	1.5278	1.5626	0.7811	40.3742	18.2232	58.5974	2.5005	2.5151	1.02276	0.511293	0.885627	0.4507	1.84028	4.40647	1.4475	0.885631	0.881438	128	1.8333	1.7027	0.8514	41.5377	16.3022	57.8398	2.9199	1.4875	0.92875	0.464375	0.882572	0.4801	1.74468	6.49422
253	Participant_253	24	Male	17	TFMS>14	170	59.4	20.5536	15.5	16	0	0	693	693	28		105	1.0833	1.2213	0.6106	38.8605	21.9038	60.7642	3.6508	0.9611	1.12731	0.563654	2.67867	1.557	4.34246	10.6895	3.74299	2.67885	2.7623	113	1.3056	1.3739	0.6872	39.9966	19.362	59.3586	3.3458	1.5994	1.05232	0.526339	1.36756	0.7529	2.80649	4.6364
254	Participant_254	28	Female	11	TFMS≤14	165	57	20.9366	28.4	8	0	0	99	99	9		88	1.0278	1.3806	0.6906	39.6988	23.1648	62.8636	4.5007	6.6722	1.34326	0.671977	2.09781	1.5853	7.50249	7.5183	4.06356	2.0978	2.35919	101	1.2222	1.4378	0.7188	39.9014	21.8123	61.7137	2.4137	4.1319	1.1764	0.5881	1.33611	0.8055	2.76406	4.06055
255	Participant_255	25	Female	13	TFMS≤14	161	51	19.6752	25.8	10	480	480	990	1950	26		108	1.1944	1.3249	0.6621	39.2414	21.5003	60.7416	2.4944	0.0433	1.10925	0.55434	0.940627	0.5411	1.95533	5.81341	1.43822	0.940618	0.976148	116	1.4444	1.4822	0.7412	41.0327	17.7466	58.7793	2.0453	0.4087	1.02614	0.513158	0.944191	0.4648	1.34527	5.14239
256	Participant_256	21	Female	17	TFMS>14	156	48	19.7239	29.6	3	240	160	495	895	11		112	1.2778	1.3554	0.6778	40.0069	18.9921	58.999	3.3072	2.4546	1.06073	0.530455	2.07216	1.1649	2.46582	5.97564	1.79054	2.07213	2.19606	120	1.5278	1.5205	0.7601	41.1955	16.7745	57.97	2.3591	1.9324	0.995254	0.497542	1.37638	0.6063	1.73101	5.51551
257	Participant_257	21	Female	10	TFMS≤14	166	55	19.9594	24.6	6	0	0	297	297	14		108	1.2778	1.4087	0.7042	40.1848	20.7257	60.9105	3.7633	2.7636	1.10245	0.551132	2.09907	1.16	3.79372	6.65358	3.22719	2.09902	2.10481	119	1.5278	1.533	0.7666	41.4358	17.5	58.9358	3.2869	0.9009	1.00339	0.50178	1.62686	0.7522	2.48215	5.78857
258	Participant_258	22	Female	13	TFMS≤14	159	53.1	21.0039	26.9	16	0	0	693	693	49		123	1.5556	1.5025	0.7516	41.9722	16.9722	58.9443	3.0829	2.2078	0.965902	0.483197	1.30391	0.6275	2.26531	5.25683	1.76115	1.30388	1.29857	138	1.8611	1.6137	0.8071	42.7917	15.4003	58.192	2.8389	2.3317	0.867059	0.433676	1.45421	0.6161	2.34181	8.82256
259	Participant_259	22	Female	14	TFMS≤14	159	50.8	20.0941	31.5	8	0	0	693	693	30		114	1.2222	1.282	0.641	40.4324	18.7266	59.159	3.7336	1.0055	1.04893	0.524464	1.67743	0.8056	2.59297	6.33698	2.05598	1.67738	1.53595	123	1.4722	1.4237	0.7119	41.8206	16.0027	57.8234	3.2961	0.8476	0.967049	0.483525	1.45452	0.6029	2.05497	8.73603
260	Participant_260	23	Male	15	TFMS>14	180	76	23.4568	15.2	10	960	160	2772	3892	6		105	1.1667	1.327	0.6635	40.0448	19.8759	59.9207	3.0742	0.0422	1.13745	0.568725	1.26561	0.8334	2.6313	7.78682	1.93756	1.26559	1.46537	112	1.3889	1.4874	0.7438	41.0187	17.9966	59.0153	2.2136	0.0828	1.07091	0.535545	1.24995	0.7548	2.7446	7.29916
261	Participant_261	24	Male	16	TFMS>14	175	65.4	21.3551	17	2	0	0	693	693	16		113	1.3333	1.4136	0.707	41.2329	19.1342	60.3672	2.919	3.958	1.06018	0.530268	1.6189	0.8784	2.92461	5.90252	2.40462	1.61899	1.65654	117	1.6111	1.6453	0.8225	41.9889	17.3898	59.3787	2.9077	3.3112	1.02121	0.510517	1.20727	0.6803	2.46541	8.36122
262	Participant_262	26	Male	14	TFMS≤14	174	62.3	20.5774	16.1	9	0	0	495	495	53		109	1.2222	1.3313	0.6659	38.4903	22.2543	60.7446	2.917	1.9681	1.08926	0.544815	1.80048	1.0227	3.23458	7.68301	2.54936	1.80051	1.87719	117	1.4722	1.5032	0.7515	40.1385	19.3009	59.4394	2.4077	1.0463	1.02103	0.510431	1.07114	0.5966	2.19415	5.69248
263	Participant_263	24	Female	14	TFMS≤14	174	53.1	17.5386	29.1	9	1440	360	495	2295	13		92	1.1667	1.5169	0.7583	40.2324	19.1078	59.3403	3.8782	1.0564	1.30022	0.65	1.46374	1.0646	3.13628	9.4239	2.79641	1.46366	1.63782	100	1.3889	1.6582	0.8288	41.5726	16.2906	57.8632	2.345	1.3478	1.19388	0.596735	1.30874	0.7182	2.64814	5.95558
264	Participant_264	24	Male	15	TFMS>14	180	68	20.9877	19.9	12	720	360	495	1575	6		116	1.3333	1.3652	0.6826	39.2392	20.9904	60.2296	2.0649	1.3635	1.02386	0.51193	1.35371	0.6335	2.08745	6.06039	1.82236	1.35378	1.23752	123	1.6111	1.5572	0.7787	40.1628	19.4878	59.6506	2.5012	0.4635	0.966557	0.483361	1.99918	0.9131	2.5307	5.9627
265	Participant_265	21	Female	11	TFMS≤14	163	79	29.7339	37	10	1440	360	198	1998	7		104	1.1944	1.3792	0.6896	39.4974	20.0883	59.5857	2.4293	2.295	1.15471	0.577353	1.41783	0.6367	2.60903	9.45625	2.5533	1.41787	1.10284	112	1.4444	1.5267	0.7636	40.7879	17.0996	57.8875	3.1682	3.0583	1.05691	0.528636	1.24827	0.5597	1.7287	5.09252
266	Participant_266	21	Female	16	TFMS>14	165	57.5	21.1203	26.8	11	2880	240	495	3615	25		115	1.25	1.2969	0.6482	41.3088	18.1096	59.4183	2.2345	1.7758	1.03754	0.518596	1.10234	0.6606	2.14797	5.24749	1.20014	1.10234	1.2739	126	1.6111	1.5274	0.7637	42.3784	14.9711	57.3494	2.658	0.6403	0.948065	0.474032	1.41565	0.8223	2.56145	7.9433
267	Participant_267	25	Male	15	TFMS>14	170	76	26.2976	23.2	0	0	0	297	297	10		102	1.1111	1.2936	0.6468	37.6568	24.2398	61.8966	5.1312	1.1792	1.1642	0.5821	3.30916	1.6465	6.74672	9.27235	4.56293	3.30935	2.82852	112	1.3333	1.4199	0.7095	38.7058	22.3323	61.0381	3.5318	0.6595	1.06491	0.532091	2.15522	1.0858	3.18118	8.39636
268	Participant_268	23	Female	15	TFMS>14	157	65.1	26.4108	40.3	11	0	0	693	693	37		110	1.1111	1.207	0.6032	38.493	22.2639	60.7569	3.85	2.0682	1.0863	0.54287	1.54744	0.9555	3.04419	7.02662	2.12486	1.54746	1.76009	120	1.3333	1.3327	0.6666	39.9864	19.7897	59.7762	3.5534	0.592	0.999492	0.499915	1.1117	0.4999	1.89664	4.2704
269	Participant_269	25	Male	18	TFMS>14	185	86	25.1278	12.8	11	960	480	4158	5598	20		96	1.2778	1.5929	0.7963	39.051	22.5465	61.5975	3.1193	1.6748	1.2466	0.623191	1.85954	1.1643	4.0611	8.49622	2.73988	1.85952	1.86829	104	1.5278	1.7483	0.874	40.4387	19.8938	60.3324	2.4432	1.9252	1.14431	0.572059	1.68012	0.9138	3.13858	4.62506
270	Participant_270	20	Male	14	TFMS≤14	173	91	30.4053	23.4	0	1440	600	297	2337	3		96	1.1389	1.4156	0.7079	37.8124	23.0572	60.8696	3.0425	3.4264	1.24298	0.621596	1.36771	0.9736	3.13389	4.67273	1.77001	1.36768	1.56633	103	1.3611	1.5693	0.7845	38.9626	20.7993	59.7619	1.639	3.2212	1.15294	0.576373	1.00584	0.5864	1.89104	4.90016
271	Participant_271	19	Male	16	TFMS>14	178	76.8	24.2394	15.3	0	0	0	4752	4752	0		102	1.1111	1.31	0.6552	38.4054	23.3079	61.7133	2.3801	0.3097	1.179	0.5897	1.68997	0.9665	2.94776	5.16563	2.68338	1.68998	1.63895	107	1.3333	1.484	0.7423	39.7525	21.2409	60.9934	1.933	1.8942	1.11302	0.556698	2.03975	1.1694	3.16332	6.00351
272	Participant_272	24	Male	17	TFMS>14	166	62.9	22.8262	20.2	8	240	240	495	975	8		111	1.3333	1.4306	0.7154	40.3491	20.3355	60.6846	1.7502	2.5953	1.07291	0.536545	0.846244	0.4943	1.68232	4.6972	1.32109	0.846296	0.9212	119	1.6111	1.6133	0.8068	41.9093	16.9939	58.9032	2.152	1.9577	1.00136	0.500763	0.927733	0.5027	1.80962	5.88388
273	Participant_273	21	Female	15	TFMS>14	165	56.3	20.6795	31.8	14	480	0	396	876	10		108	1.0833	1.1923	0.5962	39.1565	21.1212	60.2777	3.8759	1.4345	1.10057	0.550377	1.69677	0.8176	3.97712	10.6031	2.34498	1.6968	1.48544	116	1.3056	1.3445	0.6721	40.7155	17.7513	58.4668	3.7761	1.9537	1.02982	0.514825	2.08585	0.9175	2.94089	6.48403
274	Participant_274	19	Male	15	TFMS>14	178	64.5	20.3573	12	1	0	0	1386	1386	5		106	1.3333	1.5059	0.7535	40.7628	18.8319	59.5948	3.0989	0.8811	1.12942	0.565096	1.81628	0.9481	3.11657	9.20406	2.53932	1.81632	1.67782	117	1.6667	1.6928	0.8464	43.4561	14.31	57.7661	2.8403	2.8528	1.01569	0.507845	1.42932	0.7078	2.15574	12.3934
275	Participant_275	25	Female	14	TFMS≤14	156	58.9	24.2028	32.1	3	3200	1600	4158	8958	24		122	1.3333	1.3067	0.6534	39.3197	20.7313	60.051	3.0511	1.5877	0.98	0.490083	1.22157	0.6291	1.76604	6.67734	1.79414	1.22165	1.28366	127	1.6111	1.5183	0.759	41.5193	16.3719	57.8912	2.12	1.4099	0.942381	0.471111	1.34646	0.6327	2.0352	5.41049
276	Participant_276	23	Female	15	TFMS>14	158	52	20.83	33.6	4	0	120	198	318	30		108	1.1667	1.2915	0.6458	38.5376	23.6066	62.1442	2.4423	1.7087	1.10698	0.553585	1.36589	0.7228	2.19396	5.20702	2.01032	1.36591	1.30566	113	1.3889	1.4588	0.7289	39.1023	21.6933	60.7956	2.4645	0.2605	1.05036	0.524821	1.28446	0.6812	2.36073	5.42057
277	Participant_277	23	Female	18	TFMS>14	153	52	22.2137	26.4	6	1200	720	990	2910	18		94	1	1.2663	0.6332	38.1803	23.794	61.9742	3.7197	0.4055	1.2663	0.633152	1.72195	1.034	3.90856	8.38741	2.9856	1.72197	1.63307	101	1.1944	1.4051	0.7027	39.9014	20.4012	60.3026	2.1064	0.5126	1.1764	0.5883	1.70655	1.013	3.37758	8.31863
278	Participant_278	20	Female	16	TFMS>14	158	45	18.026	21.2	15	400	360	594	1354	15		105	1.0556	1.1962	0.5984	40.9129	18.0723	58.9852	3.7827	0.2486	1.13327	0.566923	2.48828	1.5228	4.81804	7.78706	3.38068	2.48813	2.68601	111	1.2778	1.3693	0.6847	41.5847	15.9145	57.4992	3.0216	2.1793	1.07164	0.535818	1.35245	0.7673	2.58436	10.055
279	Participant_279	20	Female	14	TFMS≤14	161	56	21.6041	34.1	8	240	240	693	1173	22		112	1.1389	1.2091	0.6049	39.1334	21.1851	60.3185	3.8902	1.3658	1.06164	0.531091	1.76689	1.0211	3.15127	6.66789	2.44817	1.7669	1.92265	121	1.3611	1.3416	0.6709	41.5117	17.1458	58.6574	2.5588	0.4082	0.985667	0.492917	1.99813	1.046	2.89388	8.56536
280	Participant_280	23	Female	15	TFMS>14	157	55	22.3133	35.8	4	0	0	297	297	5		118	1.3333	1.3494	0.6751	40.0852	19.6422	59.7274	2.3803	0.417	1.01207	0.506293	2.04115	1.0362	2.36721	5.75648	2.45147	2.04116	2.04672	128	1.6111	1.5078	0.7536	41.5536	16.6893	58.2429	2.3324	0.481	0.935873	0.467778	1.35476	0.6653	2.19115	6.7037
281	Participant_281	22	Female	18	TFMS>14	164	52.5	19.5196	27.7	11	2880	1440	693	5013	33		110	1.3333	1.4457	0.7228	39.0436	21.6909	60.7344	3.5245	0.5141	1.08426	0.54213	1.60334	0.9555	4.15331	10.2988	2.71494	1.60337	1.76249	119	1.6111	1.6062	0.8031	41.0745	18.0551	59.1295	2.546	0.4979	0.996949	0.498475	1.37278	0.5913	1.97543	7.13815
282	Participant_282	25	Male	16	TFMS>14	172	69.7	23.56	20.2	9	1440	400	396	2236	10		100	1	1.1976	0.5984	37.0143	25.017	62.0314	4.8179	2.5456	1.19755	0.598367	2.4995	1.1754	3.38167	9.62186	4.45371	2.4996	1.96431	111	1.1944	1.277	0.639	39.2687	21.4456	60.7143	4.0591	0.0433	1.06909	0.535	2.58634	1.3073	3.27538	6.87927
283	Participant_283	22	Female	14	TFMS≤14	164	80.3	29.8557	39.6	6	480	0	495	975	41		91	0.8889	1.1667	0.5834	35.9134	27.4805	63.3939	2.8551	1.727	1.3125	0.656364	1.41727	0.8878	4.00853	8.79096	2.80532	1.41727	1.35263	97	1.0556	1.2923	0.6462	37.1915	24.7654	61.9569	2.6741	2.3073	1.22426	0.612234	1.82065	1.1337	4.14503	5.53191
284	Participant_284	25	Female	17	TFMS>14	155	47.4	19.7294	28.8	20	0	0	693	693	26		111	1.1389	1.2217	0.611	39.6949	20.0508	59.7458	2.6064	1.3992	1.07273	0.536455	1.31183	0.6514	2.90995	5.61623	1.86858	1.31177	1.21423	118	1.3611	1.3682	0.6838	40.6003	18.3019	58.9022	2.712	1.1966	1.00517	0.502414	1.20064	0.7557	2.72338	4.17607
285	Participant_285	24	Male	13	TFMS≤14	178	76.4	24.1131	20.3	14	720	200	693	1613	19		94	1	1.272	0.6366	38.1986	23.2097	61.4083	3.5684	1.0238	1.27196	0.63663	2.41824	1.5074	4.31822	6.33614	3.70764	2.41831	2.36781	102	1.1944	1.3891	0.6952	39.7248	19.3981	59.123	3.3252	2.8592	1.163	0.582	2.20393	1.2884	2.80329	9.11533
286	Participant_286	26	Male	16	TFMS>14	175	72.9	23.8041	20.1	8	2160	200	495	2855	6		114	1.25	1.3071	0.6533	39.6346	20.1332	59.7678	2.2339	1.4709	1.04571	0.522679	1.28883	0.6877	1.96142	4.02867	1.48307	1.2888	1.31567	119	1.5	1.5003	0.7501	40.8405	17.9461	58.7866	1.8923	0.9087	1.00017	0.500085	0.965207	0.4366	1.73504	6.01914
287	Participant_287	21	Female	16	TFMS>14	170	56.4	19.5156	27.1	9	0	1680	693	2373	2		105	1.1389	1.2887	0.6443	40.1937	20.1054	60.2991	2.576	1.2338	1.13154	0.565769	1.44371	0.7807	2.6942	8.09534	2.33668	1.4437	1.37986	114	1.3611	1.4326	0.7162	41.5338	17.8826	59.4164	3.0919	2.3142	1.0525	0.526161	1.23417	0.744	2.5218	5.29509
288	Participant_288	25	Male	12	TFMS≤14	173	72.7	24.2908	20.5	4	0	0	693	693	4		109	1.25	1.3708	0.6851	40.382	19.5286	59.9105	3.0386	0.727	1.0966	0.548113	1.68925	0.8754	2.56253	6.00453	2.66564	1.68933	1.59708	116	1.5	1.5487	0.7745	41.6653	17.1283	58.7935	7.0049	1.1073	1.03246	0.516316	1.40857	0.7104	2.08423	7.66743
289	Participant_289	20	Male	15	TFMS>14	190	100	27.7008	17.8	5	2880	2160	693	5733	3		93	1.25	1.6046	0.8027	37.9509	24.7248	62.6757	4.0816	1.6648	1.2837	0.642174	2.63602	1.7805	5.88339	9.77804	3.11572	2.63601	2.7726	100	1.5	1.7777	0.8891	39.5213	21.698	61.2192	3.2131	1.8914	1.1851	0.592755	1.56354	1.1476	3.55454	5.01429
290	Participant_290	20	Male	18	TFMS>14	172	75	25.3515	19.6	4	3840	2160	3564	9564	11		102	1.1389	1.333	0.6669	37.1326	24.6582	61.7908	3.2291	2.858	1.1704	0.5856	1.28961	0.7459	2.70436	5.00077	2.03267	1.28968	1.27377	110	1.3611	1.475	0.7376	38.6022	22.283	60.8852	2.68	1.3193	1.0837	0.541944	1.63046	0.8575	2.15869	5.88341
291	Participant_291	24	Male	15	TFMS>14	175	71	23.1837	17.5	14	1440	640	693	2773	5		118	1.3333	1.3538	0.6772	38.1219	22.9581	61.08	4.2957	2.0719	1.01534	0.507931	1.89368	0.881	2.7559	3.45151	1.81123	1.89373	1.73449	122	1.6111	1.5703	0.785	39.7914	20.383	60.1744	2.5574	0.0423	0.974667	0.48725	1.51558	0.7096	2.34372	5.83722
292	Participant_292	23	Male	8	TFMS≤14	175	74	24.1633	24.3	8	0	480	693	1173	43		104	1	1.1453	0.5725	37.699	24.7047	62.4037	2.6303	0.2729	1.14529	0.572549	1.46058	0.9771	2.8144	8.26442	2.31797	1.46056	1.7065	115	1.1944	1.2364	0.6183	38.5932	22.3559	60.9492	2.6198	1.1788	1.03509	0.517632	1.48257	0.8008	2.72069	5.39365
293	Participant_293	22	Female	16	TFMS>14	162	50.4	19.2044	24.7	19	0	720	990	1710	37		107	1.1389	1.2732	0.6369	39.5105	21.9409	61.4515	3.3145	2.465	1.11792	0.559245	1.82544	1.1344	2.68106	7.8994	2.18058	1.82544	2.02836	110	1.3611	1.4713	0.7354	40.3975	19.7704	60.1679	2.6563	1.3845	1.08093	0.540278	1.31151	0.69	2.07661	7.03931
294	Participant_294	22	Female	15	TFMS>14	160	55	21.4844	37.5	9	0	0	495	495	36		114	1.1389	1.1944	0.5971	40.2009	20.3984	60.5994	2.457	2.0108	1.04875	0.524286	2.4646	1.2657	3.51087	7.5653	2.41405	2.46458	2.41418	122	1.3611	1.3334	0.6668	41.1194	17.6591	58.7785	2.3086	0.244	0.979667	0.489917	1.07008	0.5123	1.78115	6.31459
295	Participant_295	22	Female	14	TFMS≤14	154	58.7	24.7512	39.3	14	320	120	198	638	55		105	0.9444	1.0787	0.5393	37.6158	24.4486	62.0643	2.7047	0.8469	1.14212	0.571058	1.38784	0.8789	2.99316	4.15607	2.29294	1.38797	1.53907	110	1.1389	1.2389	0.6193	39.2918	20.8376	60.1294	1.8821	1.4624	1.08778	0.543796	1.19553	0.6305	2.25441	5.76794
296	Participant_296	24	Female	16	TFMS>14	160	54.3	21.2109	26.8	6	160	0	198	358	25		101	0.9444	1.1137	0.5567	38.1275	24.6099	62.7374	3.5167	2.2948	1.1792	0.5894	2.17745	1.3063	4.26018	6.91917	3.32051	2.17758	2.2163	104	1.1389	1.3129	0.6564	39.2584	22.1296	61.388	2.555	1.6602	1.15275	0.576373	1.20344	0.9293	2.61345	7.71727
297	Participant_297	25	Female	13	TFMS≤14	162	57	21.7193	22.5	11	1440	480	693	2613	22		101	1.1389	1.346	0.6726	39.5096	21.7579	61.2675	3.6527	1.9906	1.18184	0.590612	1.92395	1.1002	4.28453	5.7239	2.59469	1.92398	1.86288	107	1.3611	1.5119	0.7559	41.1245	18.3795	59.504	2.9561	1.5401	1.11075	0.555377	1.71211	0.829	3.33256	11.157
298	Participant_298	20	Female	8	TFMS≤14	165	65	23.8751	39.6	10	0	0	1386	1386	36		111	1.25	1.3398	0.6701	38.5072	22.6802	61.1874	3.4626	0.7898	1.07182	0.536091	2.16506	1.1743	3.33886	7.79138	2.83408	2.16509	2.1905	119	1.5	1.5008	0.7505	39.1326	20.9893	60.122	2.644	1.8869	1.00051	0.500339	1.97705	1.0571	2.85465	5.6848
299	Participant_299	21	Female	18	TFMS>14	160	54	21.0937	30.4	4	0	0	99	99	21		107	1.1389	1.2665	0.6336	39.5996	21.5813	61.1809	2.1268	1.9906	1.11208	0.556321	1.40139	0.784	2.9417	7.31281	1.85041	1.40134	1.40923	112	1.3611	1.445	0.7226	40.1267	19.6609	59.7876	2.4327	0.2093	1.06164	0.530909	1.14681	0.5885	2.10384	5.74236
300	Participant_300	21	Female	13	TFMS≤14	156	58	23.833	34	5	0	0	495	495	16		86	0.8611	1.2043	0.6018	37.4362	24.5318	61.968	2.44	1.5791	1.39857	0.69881	2.52831	1.7002	4.23654	5.4464	3.37158	2.5283	2.43295	93	1.0278	1.3272	0.6636	38.7713	21.4765	60.2478	2.912	2.4862	1.29133	0.645667	1.75536	1.1671	3.18921	5.32256
301	Participant_301	21	Female	17	TFMS>14	168	79	27.9904	36.8	9	0	0	198	198	22		108	1.2222	1.3539	0.677	39.2437	20.2862	59.5299	2.9485	3.0772	1.10774	0.553868	1.38794	0.7374	3.15414	5.94986	1.94188	1.38794	1.3314	115	1.4722	1.5352	0.7678	40.2254	19.0444	59.2699	3.437	1.2469	1.04281	0.521491	0.946305	0.662	2.8487	7.58333
302	Participant_302	21	Female	11	TFMS≤14	167	67.9	24.3465	34.6	3	0	0	495	495	3		95	1	1.2579	0.6287	35.707	27.8924	63.5995	2.0328	1.9236	1.25787	0.628723	0.955322	0.5503	2.14832	4.60842	1.41385	0.955345	0.875298	102	1.1944	1.3985	0.699	37.4445	24.6498	62.0943	1.847	1.2242	1.1708	0.5852	1.03674	0.663	2.02406	3.80652
303	Participant_303	20	Male	13	TFMS≤14	179	75	23.4075	10.3	2	2400	2400	2970	7770	0		104	1.3333	1.5271	0.7634	39.12	21.195	60.315	2.1706	1.4493	1.14529	0.572549	0.853274	0.5805	1.89545	4.58457	1.38689	0.853277	1.0139	112	1.6111	1.718	0.859	41.1083	17.9028	59.0111	2.0657	0.2908	1.06636	0.533182	1.33061	0.6833	1.84172	4.55292
304	Participant_304	23	Female	14	TFMS≤14	169	62	21.7079	28	8	160	720	2376	3256	11		103	1.1667	1.3492	0.6745	39.1319	21.787	60.919	3.1695	0.1301	1.15647	0.578137	1.38937	0.8854	3.42636	4.54629	2.39564	1.38927	1.53147	110	1.3889	1.501	0.7508	40.7985	18.7971	59.5956	3.3952	0.9707	1.08074	0.540556	1.12417	0.5906	2.12361	4.89118
305	Participant_305	23	Female	13	TFMS≤14	163	62	23.3355	29	8	960	0	693	1653	13		108	1.1389	1.2655	0.6327	40.8049	18.4921	59.297	3.5394	0.25	1.11113	0.555566	1.67375	0.793	3.08321	6.43843	2.99644	1.6738	1.4274	113	1.3611	1.4355	0.7176	41.4155	16.4409	57.8564	4.2847	1.7427	1.05464	0.527232	1.61237	1.0812	3.06455	9.49826
306	Participant_306	21	Female	10	TFMS≤14	164	45.8	17.0286	28	8	240	0	2772	3012	19		105	1.0833	1.2306	0.6155	39.8172	20.6027	60.4198	3.0001	0.597	1.13596	0.568173	1.62187	0.9659	2.8558	5.23621	2.20209	1.62192	1.70002	112	1.3056	1.3891	0.6944	41.0116	18.4381	59.4498	3.7963	1.1114	1.064	0.531909	1.68701	0.7477	2.72581	9.39359
307	Participant_307	22	Male	14	TFMS≤14	169	62	21.7079	21	8	720	0	693	1413	0		120	1.3333	1.3272	0.6635	40.1839	19.4109	59.5948	3.2964	0.6233	0.995424	0.497627	1.36324	0.62	2.42435	7.49527	1.70451	1.36323	1.24587	127	1.6111	1.5224	0.7612	41.4413	16.6807	58.122	3.3389	1.0484	0.944921	0.47246	1.06451	0.6099	1.88411	4.23423
308	Participant_308	21	Female	9	TFMS≤14	168	75	26.5731	37.2	15	480	480	1188	2148	37		101	1.0833	1.2801	0.6405	39.0657	21.2255	60.2911	5.5612	1.633	1.1816	0.5912	3.0341	1.9015	7.3187	8.41959	5.50662	3.03428	3.21629	111	1.3056	1.4031	0.7012	40.0102	19.4891	59.4992	3.8079	1.2188	1.07473	0.537091	2.06825	1.1704	4.57158	6.94747
309	Participant_309	24	Male	17	TFMS>14	186	93.8	27.113	21.1	9	960	480	1386	2826	15		93	1.1111	1.4205	0.7104	39.6871	21.544	61.2311	3.9859	2.3408	1.27848	0.639348	2.81533	1.6037	5.54613	5.6192	3.99552	2.81531	2.50832	101	1.3333	1.5797	0.7892	40.4456	19.4463	59.892	2.5328	0.8382	1.1848	0.5919	1.38419	0.7993	2.56196	5.43805
310	Participant_310	24	Female	17	TFMS>14	162	63.7	24.2722	36.5	6	1440	480	1188	3108	14		103	0.9444	1.0935	0.5469	37.9509	24.6232	62.5741	3.2219	1.393	1.15784	0.57902	1.41362	0.7607	3.01627	7.21027	2.15377	1.41363	1.31372	113	1.1389	1.2109	0.6055	39.6708	21.6661	61.3369	2.4917	2.573	1.06321	0.531696	1.40075	0.7089	2.13608	4.93167
311	Participant_311	20	Female	14	TFMS≤14	163	61.9	23.2978	29.2	5	0	0	297	297	5		112	1.1389	1.2149	0.6075	39.5091	20.1977	59.7068	3.2937	1.965	1.06673	0.533455	1.61934	0.9671	2.74823	7.94546	2.09122	1.61931	1.81283	120	1.3611	1.3461	0.6732	40.5484	18.7661	59.3145	3.1143	0.3734	0.988983	0.494576	1.47404	0.8145	2.4324	7.09311
312	Participant_312	20	Female	16	TFMS>14	164	50.7	18.8504	26	4	0	0	594	594	9		118	1.1111	1.118	0.5591	38.2968	23.6463	61.9431	5.421	0.5731	1.00621	0.50319	3.16345	1.3887	4.87821	7.2726	3.92457	3.16344	2.75975	120	1.3333	1.3252	0.6624	39.6999	21.0607	60.7606	4.2711	1.1468	0.993898	0.49678	2.28398	1.0805	3.38641	6.59237
313	Participant_313	23	Female	17	TFMS>14	167	65	23.3067	32.5	14	0	0	594	594	42		111	1.5	1.6136	0.8071	39.3183	20.6404	59.9587	6.0887	1.8222	1.07574	0.538056	1.27262	0.7663	2.66441	5.92479	1.42648	1.2726	1.42417	117	1.8056	1.8433	0.9219	41.1411	16.5836	57.7247	8.0639	2.7122	1.02088	0.510614	0.975727	0.5386	1.98463	6.85738
314	Participant_314	22	Male	15	TFMS>14	170	86	29.7578	30.9	9	480	840	693	2013	36		107	1.25	1.3873	0.6935	40.7514	18.9391	59.6906	2.0324	1.0906	1.10981	0.554811	1.15431	0.7069	2.21759	6.4454	1.92275	1.15432	1.27405	117	1.5	1.5393	0.7697	41.5827	17.1203	58.703	2.017	0.6892	1.02621	0.513103	1.17034	0.6005	2.1129	6.33517
315	Participant_315	21	Female	15	TFMS>14	164	53	19.7055	26.4	3	0	0	693	693	6		107	1	1.1166	0.5582	38.6448	23.9439	62.5887	3.8518	3.244	1.1166	0.558208	2.53278	1.3978	4.98618	9.90816	3.23525	2.53273	2.50401	116	1.1944	1.2198	0.6097	39.6839	20.9414	60.6253	2.5559	0.7254	1.02123	0.510439	1.61026	0.875	2.75653	6.91453
316	Participant_316	20	Female	15	TFMS>14	160	44	17.1875	21.1	4	0	0	594	594	25		112	1.2222	1.3056	0.6526	39.1319	21.6511	60.783	2.6083	0.2133	1.06818	0.533909	1.36056	0.7489	2.73076	4.9083	1.85216	1.36064	1.40264	115	1.4722	1.5195	0.7596	41.0675	18.324	59.3915	2.1871	1.1238	1.03211	0.515965	1.30536	0.7401	2.22317	5.89718
317	Participant_317	26	Male	15	TFMS>14	174	80	26.4236	21.9	5	3840	240	1188	5268	4		112	1.3889	1.4833	0.7415	40.5175	18.4202	58.9377	2.214	1.3356	1.068	0.533909	1.45501	0.8073	2.37453	5.95216	2.0822	1.45494	1.51206	120	1.6667	1.6537	0.8268	42.33	15.4766	57.8066	2.1252	0.2783	0.992203	0.496102	1.0508	0.47	1.89582	8.30738
318	Participant_318	23	Female	16	TFMS>14	169	60.2	21.0777	31.5	20	960	480	396	1836	41		99	1.1111	1.3347	0.667	37.9986	24.2456	62.2442	2.7125	0.7178	1.20125	0.600313	1.45807	1.1292	4.07304	10.0191	2.64876	1.45806	1.881	106	1.3333	1.4946	0.7474	39.0976	22.0106	61.1083	2.0362	0.5279	1.12096	0.560577	1.03883	0.5937	1.71724	4.51873
319	Participant_319	21	Male	15	TFMS>14	183	95.1	28.3974	27.4	10	0	0	495	495	7		90	1.0556	1.4029	0.7013	38.6115	24.3673	62.9788	3.1288	4.2059	1.32909	0.664432	1.85575	1.2442	3.93458	5.1922	2.80348	1.85563	1.8725	103	1.2778	1.4842	0.7425	38.2174	23.8521	62.0695	3.0726	0.7537	1.16157	0.581078	1.60272	0.8874	3.06902	5.82926
320	Participant_320	21	Male	15	TFMS>14	171	71.3	24.3836	25.2	9	0	0	297	297	20		97	1.1111	1.3678	0.684	38.5683	23.7434	62.3117	3.4116	2.3081	1.23104	0.615625	1.72514	1.0238	3.4295	8.73506	2.57849	1.7251	1.66304	107	1.3333	1.4838	0.742	39.2675	21.8379	61.1055	2.6326	0.9545	1.11283	0.556509	1.36754	0.8218	3.03279	3.93673
321	Participant_321	20	Male	10	TFMS≤14	177	64.8	20.6837	11.4	15	0	0	297	297	54		108	1.0556	1.1621	0.5811	38.4233	21.5767	60	4.2215	3.8648	1.10094	0.550472	2.28206	1.3292	3.93511	11.0596	4.25117	2.282	2.41456	115	1.2778	1.3325	0.6666	38.9637	20.71	59.6736	4.013	3.4376	1.04281	0.521667	1.84722	1.1252	3.74348	10.1067
322	Participant_322	19	Male	16	TFMS>14	171	76.6	26.1961	26.3	5	1920	240	792	2952	2		91	0.9444	1.2355	0.6175	37.4913	25.5212	63.0125	3.9397	1.2774	1.30818	0.653864	1.83132	1.2334	5.57036	10.7703	3.96604	1.83137	1.88626	101	1.1389	1.3355	0.6677	38.8027	22.6335	61.4361	2.6295	0.6173	1.1726	0.5863	1.56146	0.8989	2.26144	6.96976
323	Participant_323	20	Male	16	TFMS>14	176	64.1	20.6934	13.3	2	1920	480	693	3093	4		103	1.1389	1.3191	0.6599	39.0261	21.827	60.853	3.5959	0.2599	1.1582	0.5794	1.68914	0.9677	3.20042	6.73569	2.5297	1.6892	1.67014	110	1.3611	1.467	0.7335	39.811	19.8969	59.7079	4.3911	1.2637	1.07778	0.538889	1.37929	0.7798	2.82987	6.53619
324	Participant_324	21	Male	12	TFMS≤14	176	69	22.2753	15.2	3	1920	480	792	3192	14		112	1.25	1.3361	0.6681	40.0068	20.4457	60.4525	2.7925	1.1546	1.06891	0.534455	1.45676	0.7785	2.33335	4.70221	2.10413	1.45669	1.45669	119	1.5	1.5076	0.7537	41.3322	17.7234	59.0556	1.816	0.9428	1.00508	0.502458	1.13475	0.5992	1.62585	6.01013
325	Participant_325	20	Male	17	TFMS>14	175	83	27.102	20.8	2	960	240	198	1398	5		104	1.1944	1.3628	0.6813	38.1337	23.4576	61.5913	2.8863	0.6165	1.14098	0.570392	1.87942	1.0377	3.89891	6.00445	2.87719	1.87939	1.81933	111	1.4444	1.5532	0.7766	39.9053	20.7643	60.6696	2.7674	1.4512	1.07527	0.537636	1.66219	0.9286	2.99459	4.59683
326	Participant_326	21	Male	13	TFMS≤14	179	58	18.1018	11.5	14	0	0	693	693	42		111	1.4722	1.5788	0.7894	42.2007	16.7514	58.9522	2.4405	2.77	1.07236	0.536182	1.17903	0.6393	2.40043	5.80071	1.82097	1.17907	1.1924	122	1.7778	1.747	0.8735	43.4871	14.1791	57.6662	2.1289	2.6879	0.982667	0.491333	1.01539	0.5233	1.72419	5.8819
327	Participant_327	21	Female	15	TFMS>14	156	50	20.5457	33.3	13	0	160	1386	1546	30		95	1	1.2617	0.631	36.6471	26.1888	62.836	3.5988	1.2797	1.26174	0.630978	1.62186	1.0765	3.94956	6.93923	2.40817	1.62177	1.70613	105	1.1944	1.3671	0.6835	38.787	22.443	61.2301	2.8955	0.0433	1.14451	0.572255	1.67134	0.8818	2.55678	6.14445
328	Participant_328	21	Female	14	TFMS≤14	166	59	21.4109	31.2	6	480	640	594	1714	21		98	1.1389	1.3871	0.6933	40.8142	19.2439	60.0582	3.4653	2.1606	1.21792	0.60875	1.75749	1.1016	4.2718	6.1765	2.96279	1.75748	1.80963	106	1.3611	1.5328	0.7661	41.6667	17.0253	58.6919	2.5739	0.8644	1.12615	0.562885	1.46899	0.7229	2.6976	6.9802
329	Participant_329	24	Female	16	TFMS>14	174	106	35.0112	41.9	18	480	0	198	678	20		101	1.3333	1.5696	0.7851	38.0224	23.8022	61.8247	2.2449	0.4013	1.1772	0.5888	1.06148	0.5706	2.14058	5.41252	1.78036	1.06154	0.969113	110	1.6111	1.7451	0.8725	39.3913	21.5421	60.9335	1.8798	0.8281	1.08315	0.541574	0.728785	0.3828	1.38178	3.68348
330	Participant_330	24	Female	18	TFMS>14	165	51.1	18.7695	23.1	0	240	0	297	537	1		114	1.3333	1.3919	0.696	41.5156	17.157	58.6726	2.3705	0.4543	1.04393	0.521964	1.78916	0.9714	2.33334	7.57359	2.28318	1.78916	1.86099	123	1.6111	1.563	0.7814	42.8185	14.2616	57.0801	2.4257	0.2365	0.970164	0.485	1.33928	0.5356	1.61449	6.61917
331	Participant_331	26	Male	17	TFMS>14	168	65.5	23.2072	21.3	10	0	0	693	693	11		106	1.1667	1.313	0.6567	39.8667	19.9077	59.7744	2.7036	0.8372	1.12538	0.562885	1.46277	0.8512	2.91145	8.19834	2.05205	1.46282	1.51215	113	1.3889	1.4598	0.7298	41.0805	17.6011	58.6816	1.9885	0.5773	1.05107	0.525446	1.30498	0.6565	2.11341	6.07348
332	Participant_332	25	Male	13	TFMS≤14	181	76.9	23.473	25.6	0	0	0	495	495	2		117	1.6111	1.6333	0.8165	42.6871	15.6293	58.3163	2.1363	2.3787	1.01379	0.50681	2.07096	1.1398	2.77836	7.00927	2.6274	2.07093	2.24895	126	1.9444	1.8504	0.925	43.5763	14.2034	57.7797	2.1214	3.1872	0.951613	0.475726	1.37644	0.7005	1.83012	8.16987
333	Participant_333	21	Female	15	TFMS>14	161	49.6	19.1351	29.6	10	0	0	198	198	32		109	1.2222	1.3472	0.6736	38.4286	23.2455	61.6741	2.4556	0.2189	1.10226	0.551132	1.37234	0.7748	2.37609	4.59444	1.84989	1.37239	1.40592	115	1.4722	1.5283	0.764	39.6992	20.2636	59.9628	2.4769	0.8478	1.03807	0.518947	0.962233	0.544	1.98719	6.40212
334	Participant_334	21	Female	15	TFMS>14	152	48	20.7756	31.8	5	0	0	990	990	4		112	1	1.0647	0.5323	38.5929	21.5847	60.1776	4.1074	3.1362	1.06473	0.532273	1.85141	0.9235	3.28765	6.81409	2.32545	1.85136	1.73505	121	1.1944	1.1751	0.5877	39.4715	20.0237	59.4952	1.859	2.5843	0.983833	0.492	1.50868	0.7314	2.22642	4.93565
335	Participant_335	24	Female	8	TFMS≤14	159	54	21.3599	31.9	13	0	0	297	297	15		117	1.2778	1.3047	0.6522	38.8213	21.7325	60.5539	3.1347	1.5966	1.02103	0.510431	1.18828	0.6649	1.89509	5.43472	1.7112	1.18829	1.30265	124	1.5278	1.4762	0.7381	39.4469	19.7319	59.1788	2.5692	3.3704	0.96623	0.483115	0.958575	0.6348	1.84172	5.6472
336	Participant_336	26	Female	16	TFMS>14	159	54	21.3599	28	13	0	0	495	495	24		105	1.1389	1.3028	0.6511	38.6184	22.4889	61.1073	3.2891	0.6941	1.14392	0.571667	2.29712	1.1144	3.27176	9.6492	3.21222	2.29714	1.94933	113	1.3611	1.448	0.7239	40.2666	19.2958	59.5625	2.9072	0.4577	1.06382	0.531818	1.51563	0.7469	2.15787	6.0806
337	Participant_337	29	Male	12	TFMS≤14	173	82	27.3982	31.9	3	1800	800	1386	3986	13		104	1	1.1414	0.5709	38.8421	21.9722	60.8143	3.1246	0.9503	1.14137	0.570882	2.03084	1.0228	3.36902	9.00547	2.86068	2.03093	1.79163	111	1.1944	1.2854	0.6428	39.1113	21.4056	60.517	2.7503	0.9458	1.07618	0.538182	1.83713	0.9925	3.01626	6.72347
338	Participant_338	27	Male	13	TFMS≤14	166	83.8	30.4108	36	3	0	0	396	396	19		91	0.8889	1.1695	0.5847	38.5386	24.322	62.8606	3.3537	3.7066	1.31568	0.657841	2.10911	1.4436	3.81591	8.40803	3.08206	2.10908	2.1945	99	1.0556	1.2742	0.637	40.0169	21.9442	61.9611	3.6449	5.0693	1.20714	0.603469	2.70395	1.6481	5.05386	5.05282
339	Participant_339	28	Female	14	TFMS≤14	161	53.6	20.6782	27.8	2	0	0	198	198	37		99	1.1389	1.3739	0.6869	39.9086	21.0286	60.9372	2.3479	2.1423	1.20633	0.603163	1.36769	0.7805	2.72623	5.05597	2.15172	1.36771	1.29395	109	1.3611	1.5008	0.7503	40.3662	20.1916	60.5578	2.3241	2.2738	1.10264	0.551226	1.86571	1.1113	3.25049	7.27332
340	Participant_340	24	Female	17	TFMS>14	156	58	23.833	30.2	3	240	160	396	796	3		116	1.2222	1.2621	0.6309	41.1485	17.788	58.9365	3.1029	0.2067	1.03263	0.516228	1.57644	0.8899	2.98942	5.6347	2.49116	1.57646	1.72387	123	1.4722	1.4203	0.7104	42.311	15.4291	57.74	2.3598	0.1206	0.964754	0.482541	1.10412	0.6313	2.1186	8.05426
341	Participant_341	24	Male	15	TFMS>14	171	66	22.571	18.3	21	1920	720	1386	4026	3		111	1.3333	1.4356	0.7177	41.8946	17.0213	58.9159	2.4335	1.9537	1.07673	0.538273	1.5445	0.8486	2.93833	9.1738	2.16546	1.54451	1.57657	118	1.6111	1.6236	0.8117	42.8914	15.124	58.0154	2.8056	2.1395	1.00776	0.503793	1.2367	0.494	2.16663	8.1731
342	Participant_342	24	Male	16	TFMS>14	184	68	20.0851	11.5	3	720	240	693	1653	4		94	1.0833	1.389	0.6943	36.7921	27.0261	63.8182	2.6521	1.6729	1.28217	0.64087	1.53347	0.8229	3.11996	5.2453	2.31736	1.53346	1.28409	102	1.3056	1.5351	0.7674	37.9997	24.2218	62.2215	2.2074	0.5836	1.1758	0.5878	1.03591	0.4915	2.00002	4.46499
343	Participant_343	24	Female	16	TFMS>14	159	44	17.4044	31	6	0	0	396	396	35		89	0.8333	1.1258	0.5627	39.215	21.7766	60.9916	3.9908	0.5282	1.35093	0.675233	2.1643	1.215	4.93408	12.1791	3.14568	2.1644	1.79936	98	1	1.2271	0.613	38.3531	21.9694	60.3226	2.9473	3.3946	1.22708	0.613021	1.84459	1.0038	3.66437	7.8268
344	Participant_344	23	Female	14	TFMS≤14	160	52	20.3125	32	9	0	720	495	1215	21		105	0.9722	1.096	0.5477	38.741	22.5179	61.259	4.6061	0	1.12731	0.563365	2.51566	1.3146	3.53347	6.16798	2.76172	2.51572	2.33343	111	1.1667	1.2628	0.6315	40.0171	19.3841	59.4012	3.6253	1.4167	1.08241	0.541296	2.22031	1.0852	3.36031	12.1796
345	Participant_345	25	Male	15	TFMS>14	168	59.3	21.0105	17.8	5	240	400	594	1234	0		109	1.1389	1.2454	0.6228	39.3226	20.3556	59.6782	3.7947	2.5092	1.09352	0.546852	1.80474	0.954	3.31947	8.30631	2.0443	1.80472	1.74456	116	1.3611	1.3965	0.6983	40.6122	17.8181	58.4302	3.1577	2.3713	1.02596	0.51307	1.38868	0.7478	2.17964	5.92431
346	Participant_346	23	Male	16	TFMS>14	167	70	25.0995	22	7	480	600	2772	3852	27		112	1.2222	1.3004	0.6501	40.1572	19.9932	60.1504	3.2753	0.7554	1.064	0.531909	1.23649	0.7775	2.86723	5.5984	2.19649	1.2365	1.46166	118	1.4722	1.4829	0.7416	41.2701	18.2814	59.5515	4.047	1.8954	1.00724	0.503707	1.14825	0.5766	1.96704	7.25656
347	Participant_347	25	Male	14	TFMS≤14	178	63	19.8839	12.9	4	0	800	297	1097	0		110	1.1111	1.2054	0.6027	39.5527	20.7067	60.2595	2.6171	0.5074	1.08481	0.542407	1.40514	0.7742	2.1905	4.98003	1.9504	1.4052	1.42742	116	1.3333	1.3799	0.6903	40.8713	18.2065	59.0778	2.4795	0.1244	1.03491	0.517719	1.20228	0.6693	2.19641	7.1123
348	Participant_348	25	Male	18	TFMS>14	178	68	21.4619	18	3	0	0	297	297	4		98	1.1944	1.4562	0.7282	39.1661	21.2406	60.4067	2.9576	1.0848	1.21917	0.609688	2.15602	1.3822	4.43777	11.4615	2.79654	2.15609	2.26706	110	1.4444	1.5785	0.7891	40.5186	17.8444	58.363	3.4982	2.7229	1.09278	0.546296	1.48823	0.8723	3.05662	8.9423
349	Participant_349	25	Female	14	TFMS≤14	160	56	21.875	34.7	5	0	0	495	495	19		99	0.8889	1.0736	0.5371	35.8229	26.8503	62.6732	6.4411	4.1124	1.20776	0.604286	1.86465	1.2536	5.25362	8.57905	3.04452	1.86471	2.07446	106	1.0556	1.1883	0.5944	37.5299	24.2569	61.7868	3.9447	1.8043	1.12577	0.563077	1.55182	0.8329	3.2161	4.95364
350	Participant_350	25	Female	17	TFMS>14	169	58.5	20.4825	26.3	8	240	360	165	765	11		96	1.0556	1.3159	0.6575	38.4195	23.1439	61.5634	4.2882	0.0444	1.2466	0.622872	2.19703	1.5565	5.29445	11.2384	3.32503	2.19703	2.49897	109	1.2778	1.3966	0.6982	39.634	21.0599	60.6939	2.5747	0.8156	1.09302	0.546415	1.63463	0.9335	2.80592	5.72272
351	Participant_351	28	Female	15	TFMS>14	167	59	21.1553	12.9	0	7200	1440	1188	9828	12		99	1.1111	1.335	0.6676	38.0094	24.6922	62.7016	3.3303	1.9401	1.20146	0.600833	1.66449	0.97	2.7559	6.88355	2.54954	1.66455	1.61449	112	1.3333	1.4218	0.711	39.6078	21.2276	60.8355	5.5823	1.1256	1.06636	0.533273	1.33058	0.6824	2.4533	5.26626
352	Participant_352	19	Female	14	TFMS≤14	170	60	20.7612	16.7	3	7200	1440	4752	13392	8		98	0.9722	1.1863	0.593	39.918	23.3396	63.2576	4.9181	8.2898	1.22021	0.609896	1.45342	0.91	2.84533	5.5995	2.4503	1.45346	1.49198	102	1.1667	1.3664	0.683	41.291	20.4747	61.7657	5.7987	7.6911	1.1712	0.5854	1.34071	0.8297	2.31067	4.08504
353	Participant_353	23	Female	11	TFMS≤14	152	52	22.5069	31.5	7	0	0	2970	2970	50		91	0.75	0.9869	0.4937	36.4594	27.133	63.5924	4.2069	0.1422	1.31591	0.658295	2.14528	1.7351	6.14656	10.7331	2.86009	2.14524	2.63581	98	0.8889	1.08	0.5399	37.1228	25.3772	62.5	4.1437	1.011	1.215	0.607396	2.15805	1.0557	3.26403	7.20923
354	Participant_354	25	Female	17	TFMS>14	168	71	25.1559		8	0	0	594	594	18		107	1.25	1.3894	0.6947	39.7556	19.6401	59.3957	3.169	2.1125	1.11151	0.555755	1.81958	0.8923	2.39664	7.77135	2.08113	1.81958	1.60555	116	1.5	1.5424	0.7711	40.6927	17.3179	58.0106	3.071	3.1646	1.02825	0.514035	1.43581	0.6782	2.38249	7.52805
355	Participant_355	28	Female	15	TFMS>14	166	54	19.5965		9	0	0	247.5	247.5	7		99	1.0278	1.2453	0.6222	39.1334	21.3205	60.4539	3.9917	1.07	1.21167	0.605417	3.37508	2.0987	4.74735	7.85629	4.07286	3.37491	3.46652	107	1.2222	1.3642	0.6821	40.5927	18.9008	59.4935	2.2745	0.0833	1.11615	0.558077	1.45048	0.8329	2.53543	6.90288
356	Participant_356	21	Female	16	TFMS>14	156	48.7	20.0115	30.3	21	0	960	4158	5118	19		100	1.1111	1.3195	0.6592	38.0993	21.9282	60.0275	3.7925	4.919	1.18755	0.593265	1.60968	0.9926	3.29166	6.64122	2.51868	1.60973	1.67308	117	1.3333	1.3618	0.6807	40.2093	18.2309	58.4402	3.7478	3.3034	1.02138	0.510517	1.75753	0.8987	3.48253	10.9622
357	Participant_357	21	Male	15	TFMS>14	170	78.5	27.1626	28.5	3	7200	3600	1188	11988	6		91	1.0556	1.3883	0.6941	37.9298	23.6046	61.5345	3.9879	1.372	1.31523	0.657614	1.57576	1.0579	3.23941	8.37379	2.53175	1.57571	1.60872	99	1.2778	1.5365	0.7682	39.053	21.368	60.4209	2.7709	1.3383	1.20245	0.601224	0.865395	0.5849	2.31122	5.99495
358	Participant_358	23	Female	17	TFMS>14	166	73	26.4915	36.5	1	480	120	346.5	946.5	6		107	1.1944	1.3378	0.6687	39.9764	20.9063	60.8827	3.3758	2.1726	1.12	0.559811	1.96222	1.2884	4.14169	6.05272	3.34726	1.96229	2.30153	116	1.4444	1.4898	0.7452	40.9934	17.3839	58.3773	2.955	1.5236	1.0314	0.515877	1.38836	0.7079	2.0818	7.29698
359	Participant_359	20	Female	15	TFMS>14	160	51.2	20	31.1	18	0	480	4158	4638	41		104	1.0278	1.1769	0.589	38.4932	22.3116	60.8048	4.0308	1.7738	1.1451	0.573039	2.20371	1.1885	2.94831	8.38801	2.1347	2.20365	2.07403	108	1.2222	1.3444	0.6723	39.2453	21.0463	60.2916	2.8096	1.1732	1.1	0.550094	0.91765	0.6764	2.08458	5.4133
360	Participant_360	21	Female	18	TFMS>14	159	53.6	21.2017	27.6	8	0	0	346.5	346.5	3		95	0.9444	1.1775	0.589	36.5358	27.4061	63.942	3.9319	1.3164	1.24681	0.623617	1.9443	1.1971	3.94462	5.98954	2.34212	1.94435	1.91958	105	1.1389	1.2896	0.645	38.5281	24.1039	62.632	2.7171	3.0854	1.13235	0.566373	1.24391	0.7675	2.568	5.88411
361	Participant_361	27	Female	16	TFMS>14	160	66.5	25.9766	42.6	7	0	120	577.5	697.5	16		106	1.1111	1.2549	0.627	39.7582	21.7776	61.5358	2.9966	3.309	1.12942	0.564327	1.50794	0.92	3.5316	5.03499	2.57931	1.50793	1.63029	114	1.3333	1.3852	0.6927	41.32	18.9068	60.2269	2.7103	3.8322	1.03893	0.519554	1.02385	0.5025	2.13819	4.73375
362	Participant_362	24	Female	15	TFMS>14	164	47.3	17.5863	25.9	21	0	0	808.5	808.5	39		93	0.7778	0.9975	0.4989	36.5968	28.0887	64.6855	4.1466	3.6265	1.28244	0.641444	2.49387	1.7563	5.50731	10.8891	3.92391	2.49392	2.73809	102	0.9444	1.1007	0.5503	38.9737	23.3053	62.279	4.0778	3.2672	1.1654	0.5827	1.43784	0.8956	3.48389	7.35026
363	Participant_363	22	Female	18	TFMS>14	157	57.7	23.4087	26.7	9	240	120	2376	2736	5		117	1.1111	1.1301	0.5648	41.0409	18.0878	59.1287	2.6	0.4139	1.01707	0.508362	1.18336	0.6591	2.14908	6.95828	1.58434	1.18337	1.29647	121	1.3333	1.3122	0.656	42.1169	16.6977	58.8146	2.9165	2.2363	0.984167	0.492	1.23464	0.5492	2.31119	6.02538
364	Participant_364	21	Female	12	TFMS≤14	161	73.9	28.5097	39.4	12	800	240	577.5	1617.5	21		102	0.9722	1.1383	0.5696	38.5207	23.1978	61.7185	7.776	0.6228	1.1708	0.5859	1.89324	1.3141	3.99655	6.9166	2.94887	1.89329	2.24291	109	1.1667	1.2752	0.6378	40.2727	20.0242	60.2969	2.9385	1.4834	1.09302	0.546698	1.53495	0.7706	2.28741	7.17232
365	Participant_365	21	Female	15	TFMS>14	160	59.3	23.1641	28.9	6	1920	480	577.5	2977.5	1		113	1.25	1.3192	0.6597	39.7293	19.8985	59.6277	2.5748	1.6054	1.05536	0.527768	1.15998	0.6118	2.51049	7.53826	1.70256	1.16	1.15919	119	1.5	1.4942	0.7471	40.684	17.4749	58.1589	2.6163	2.8043	0.996102	0.498051	0.886729	0.4511	1.45635	5.06612
366	Participant_366	23	Female	16	TFMS>14	155	43.3	18.0229	28.7	7	0	0	346.5	346.5	23		104	1.25	1.4311	0.7157	40.0582	20.0548	60.113	2.3172	0.4285	1.1449	0.572549	1.86596	1.1689	2.96693	8.43439	2.92266	1.8659	2.04162	115	1.5	1.554	0.7772	41.6765	17.3074	58.9839	2.2069	1.5974	1.03596	0.518158	1.2638	0.7353	2.50741	8.37387
367	Participant_367	24	Female	13	TFMS≤14	161	58.3	22.4914	30.8	10	480	120	495	1095	52		106	1.1389	1.2782	0.6391	37.8684	23.9034	61.7718	3.657	0.9457	1.12231	0.561154	2.61309	1.3785	5.36965	10.7202	3.27981	2.61307	2.45647	114	1.3611	1.4199	0.7096	39.6782	21.2941	60.9723	3.0437	1.624	1.04321	0.521339	1.63152	0.9842	3.25418	8.26426
368	Participant_368	23	Female	16	TFMS>14	158	52.4	20.9902	21.3	0	480	0	693	1173	27		109	1.25	1.3757	0.6877	40.9395	19.0468	59.9863	2.1233	2.2454	1.10057	0.550189	1.13588	0.7266	2.39207	4.44117	1.72856	1.13589	1.32064	118	1.5	1.5163	0.7585	42.4697	15.9304	58.4001	2.5549	2.0695	1.01086	0.50569	1.13665	0.5289	2.04452	8.85351
369	Participant_369	24	Male	15	TFMS>14	168	58	20.5499	22	0	0	720	693	1413	0		108	1.3333	1.4601	0.7302	40.4032	18.9697	59.3728	2.3292	0.5841	1.09509	0.547642	1.04374	0.5796	1.97682	5.08337	1.77674	1.04378	1.05828	114	1.6111	1.6799	0.8398	41.4112	17.0577	58.4689	3.18	0.2891	1.04268	0.52125	0.735971	0.4037	1.99487	5.16248
370	Participant_370	19	Female	12	TFMS≤14	164	62.3	23.1633	33.2	7	0	0	198	198	15		108	1.1389	1.2564	0.6283	39.3706	20.6773	60.0479	3.6065	1.4815	1.10321	0.551698	2.07439	1.1854	3.43657	8.81595	3.03308	2.0743	2.1486	116	1.3611	1.4022	0.7011	41.2466	17.1662	58.4128	2.7767	0.8224	1.03018	0.515088	1.46021	0.7101	1.98586	8.03032
371	Participant_371	22	Female	15	TFMS>14	160	59.1	23.0859	26.9	4	0	240	396	636	11		97	1.1111	1.3655	0.6833	39.21	21.3087	60.5187	5.6809	0.6894	1.22896	0.615	2.55289	1.4105	6.13007	8.2769	3.57955	2.5529	2.29354	112	1.3333	1.4245	0.7125	40.4867	18.8053	59.292	3.8377	0.7003	1.06836	0.534364	1.65294	0.8584	3.49991	7.04535
372	Participant_372	21	Male	15	TFMS>14	175	105	34.2857	32	7	1440	360	990	2790	13		96	1.1111	1.3705	0.6849	38.8994	22.7186	61.6181	3.8003	1.3393	1.2334	0.616383	1.48906	0.8102	3.20339	6.38772	3.03158	1.48914	1.31442	105	1.3333	1.5187	0.7592	39.938	20.7781	60.7161	3.9554	1.6628	1.13902	0.569412	1.56718	0.9479	3.18944	5.01297
373	Participant_373	27	Male	16	TFMS>14	173	98	32.7442	30	0	0	480	1386	1866	0		113	1.3889	1.469	0.7344	40.0979	19.9055	60.0034	1.6365	0.253	1.05768	0.52875	0.945284	0.4356	2.19937	5.32164	1.47608	0.945315	0.823798	120	1.6667	1.6554	0.8275	41.6894	16.7235	58.413	1.6626	0.2821	0.99322	0.496525	0.751596	0.3933	1.40491	5.28179
374	Participant_374	24	Female	19	TFMS>14	161	55.6	21.4498	22.3	3	5040	840	1386	7266	3		107	1.0833	1.2177	0.6088	37.9983	24.0547	62.053	2.8665	0.0442	1.12404	0.561923	1.51361	0.7793	2.88908	8.02795	2.18684	1.5136	1.38678	114	1.3056	1.3687	0.6843	38.8861	21.9724	60.8585	2.2225	0.6549	1.04839	0.524107	1.03202	0.5437	1.94337	5.08593
375	Participant_375	25	Male	17	TFMS>14	176	63.3	20.4352	16.8	8	0	480	1188	1668	9		114	1.25	1.3114	0.6557	40.3064	19.6936	60	2.8048	0.833	1.04911	0.524554	1.5208	0.8144	2.76259	7.63344	1.95233	1.5208	1.55248	120	1.5	1.4911	0.7456	40.8866	17.7835	58.6701	2.4473	1.0608	0.994068	0.497034	1.09761	0.4968	1.95052	4.06838
376	Participant_376	20	Female	14	TFMS≤14	157	53.7	21.7859	34.5	3	0	0	297	297	11		102	1.1389	1.3339	0.6665	38.5758	22.8313	61.4071	2.882	0.0443	1.1712	0.5852	1.57101	0.7547	3.7635	6.4854	2.49825	1.57104	1.28968	112	1.3611	1.4576	0.7289	39.983	19.4907	59.4737	3.571	1.3497	1.07091	0.535545	1.87833	1.0255	3.47523	10.585
377	Participant_377	20	Female	13	TFMS≤14	168	62.7	22.2151	30.5	3	0	0	198	198	3		108	1.1667	1.2895	0.645	38.6821	23.1137	61.7958	2.6458	1.2434	1.10528	0.55283	1.39063	0.7366	2.79173	6.43168	1.76662	1.39061	1.33237	116	1.3889	1.4301	0.715	39.632	20.3442	59.9761	2.1867	0.984	1.02965	0.514825	1.29877	0.6554	1.91638	4.73255
378	Participant_378	20	Female	14	TFMS≤14	152	50.2	21.7278	27.6	1	0	0	1386	1386	0		112	1.0556	1.1256	0.563	39.0281	22.046	61.0742	3.6686	0.0859	1.06636	0.533364	1.7372	0.8637	3.43727	7.68212	2.02475	1.73713	1.61931	117	1.2778	1.3069	0.6534	40.2562	19.2347	59.4909	3.2925	0.6262	1.02276	0.511379	1.13085	0.6144	2.35839	7.31335
379	Participant_379	21	Male	19	TFMS>14	176	78.7	25.4068	25.4	6	480	1200	495	2175	4		109	1.3333	1.4674	0.7336	38.8356	21.9923	60.8279	3.4398	0.8628	1.10056	0.550185	1.79533	0.9228	2.98103	8.85446	2.2687	1.7954	1.6772	115	1.6111	1.6671	0.8334	40.234	19.176	59.41	2.5656	0.8811	1.03474	0.517281	1.65024	0.8485	2.96764	6.16187
380	Participant_380	20	Female	17	TFMS>14	161	59.8	23.0701	30.2	10	720	240	990	1950	11		115	1.25	1.3022	0.6511	39.1714	21.674	60.8454	2.7706	0.043	1.04175	0.520877	1.52703	0.7787	2.68129	4.40251	1.89168	1.52704	1.49494	122	1.5	1.467	0.7336	40.7805	18.2686	59.0491	2.3818	0.417	0.978	0.489083	1.31738	0.5951	2.05613	7.16968
381	Participant_381	22	Female	14	TFMS≤14	160	61	23.8281	24.9	9	3360	840	5544	9744	17		92	0.8889	1.1532	0.577	36.9818	25.5396	62.5214	5.3784	1.3343	1.29733	0.649111	2.60203	1.733	6.61109	11.0006	3.58789	2.60206	2.66977	98	1.0556	1.2871	0.6433	38.083	23.4239	61.5069	4.4207	1.071	1.21938	0.609479	1.91904	1.2552	4.14857	5.43547
382	Participant_382	28	Male	18	TFMS>14	190	83	22.9917		6	1920	1200	396	3516	2		103	1.2222	1.4156	0.7082	40.0449	19.8757	59.9206	3.262	0.1268	1.1582	0.5794	1.55115	0.8581	1.86141	6.40279	2.33643	1.55116	1.48108	111	1.4722	1.5847	0.7923	41.098	17.8209	58.9189	9.244	0.0411	1.07636	0.538182	1.13934	0.6206	1.7339	6.06198
383	Participant_383	27	Male	18	TFMS>14	180	90.5	27.9321		13	960	960	297	2217	16		92	1	1.303	0.6515	37.8859	24.5596	62.4455	3.537	0.9042	1.30295	0.651477	2.22901	1.3841	4.47	9.93583	3.24059	2.22908	2.12453	102	1.1944	1.3915	0.6955	38.6266	23.0558	61.6824	4.6027	0.8032	1.165	0.5823	1.08917	0.743	2.73982	6.43396
384	Participant_384	20	Female	15	TFMS>14	162	61.7	23.5101	39.6	17	0	0	792	792	28		98	0.8333	1.0071	0.5033	37.0626	26.754	63.8166	2.9517	2.4007	1.20854	0.603958	1.6973	1.1085	4.00808	5.82717	2.36412	1.69735	1.83536	103	1	1.1549	0.5773	38.7776	23.3786	62.1562	3.3934	2.4375	1.1549	0.577255	1.47874	0.723	2.85784	5.15258
385	Participant_385	20	Female	14	TFMS≤14	158	68.2	27.3193		13	0	0	2772	2772	29		109	1.1389	1.2408	0.6207	39.6736	20.1938	59.8674	3.303	1.1502	1.08944	0.545	1.71643	0.7698	2.59719	8.25352	2.44106	1.71648	1.41248	120	1.3611	1.3519	0.6758	40.6314	18.1911	58.8225	2.9121	1.3952	0.99322	0.496525	1.57766	0.7879	2.82122	5.62308
386	Participant_386	23	Male	14	TFMS≤14	186	97	28.0379	31.6	5	2160	480	693	3333	3		104	1.3889	1.5899	0.7953	40.7845	18.8249	59.6095	2.5757	0.9102	1.14471	0.572647	1.92135	1.0634	3.34612	10.6407	2.43199	1.92136	1.85706	116	1.6667	1.7059	0.8526	42.2009	16.181	58.3819	2.3239	1.447	1.02351	0.511579	1.53656	0.8794	2.48881	8.50813
387	Participant_387	20	Male	15	TFMS>14	176	69	22.2753	12.5	3	5040	840	1386	7266	1		106	1.4722	1.6636	0.8319	40.1634	18.9925	59.1559	1.7004	1.6807	1.13	0.565096	0.756542	0.3602	1.55589	4.67079	1.38228	0.756504	0.637343	113	1.7778	1.8775	0.9386	41.6131	15.7592	57.3723	2.553	2.4088	1.05607	0.527946	0.793784	0.4307	1.53461	5.2858
388	Participant_388	20	Male	19	TFMS>14	172	59.3	20.0446	13.1	6	2560	2880	297	5737	14		102	1.3889	1.6233	0.8113	39.9555	19.473	59.4285	4.2517	1.5414	1.1688	0.5841	2.00759	1.2194	3.68685	5.77004	2.54558	2.00753	2.08764	109	1.6667	1.8293	0.9148	41.6568	16.1802	57.837	3.109	1.2077	1.09759	0.548889	2.37163	1.3112	3.43905	7.32562
389	Participant_389	20	Female	19	TFMS>14	156	42.2	17.3406	26.6	4	0	0	594	594	25		106	0.9167	1.03	0.5148	37.5834	23.9261	61.5095	3.9427	2.3385	1.12365	0.561635	2.16626	1.2354	3.67556	5.47728	3.00214	2.16613	2.19961	120	1.1111	1.1145	0.5569	39.0504	21.1558	60.2062	3.543	1.886	1.00305	0.501186	1.67478	0.8454	3.43735	7.73878
390	Participant_390	20	Female	17	TFMS>14	155	55.8	23.2258	35.4	4	320	600	1386	2306	11		109	1.2778	1.3969	0.6986	39.9551	18.9679	58.923	3.0371	2.7594	1.09321	0.546698	1.56704	0.8575	2.82542	4.48178	2.17267	1.56707	1.56852	119	1.5278	1.5229	0.7616	41.1495	16.1367	57.2862	2.5896	3.7312	0.99678	0.498475	1.38765	0.6905	2.12202	6.77772
391	Participant_391	20	Female	13	TFMS≤14	166	55.9	20.286	29.2	2	1280	480	2772	4532	1		106	1.1111	1.2477	0.6237	39.0478	20.8255	59.8733	3.3019	2.6329	1.12288	0.561346	2.20457	1.2291	3.6002	5.74008	2.55022	2.20464	2.18959	113	1.3333	1.4087	0.7045	40.9224	17.7422	58.6646	2.9271	0.9869	1.05655	0.528364	1.73319	0.8637	2.67531	9.44471
392	Participant_392	20	Female	12	TFMS≤14	149	44.8	20.1793	34.4	12	0	0	297	297	41		92	0.7778	1.0075	0.5036	37.7595	24.6698	62.4292	5.1767	0.501	1.29533	0.647444	3.1332	2.0017	5.95665	7.59349	4.42357	3.13315	3.09174	102	0.9444	1.102	0.5512	38.4985	23.1059	61.6044	3.2256	0.2675	1.1668	0.5836	1.96507	1.049	3.66768	7.97848
393	Participant_393	20	Female	11	TFMS≤14	160	57	22.2656	36.9	0	0	360	495	855	39		98	0.9444	1.1538	0.5769	37.1078	25.648	62.7558	3.1937	0.367	1.22167	0.610833	1.92923	1.0865	3.90268	8.24548	2.7854	1.92934	1.77877	107	1.1389	1.2762	0.638	38.8786	22.529	61.4076	2.49	0.739	1.12057	0.560189	1.44437	0.874	3.10068	6.50451
394	Participant_394	20	Female	14	TFMS≤14	163	66	24.841	37.2	1	0	120	693	813	1		105	1.2222	1.3912	0.6958	39.2937	21.6021	60.8958	2.4121	0.4742	1.13824	0.569314	1.18899	0.6024	2.14284	4.69028	1.85366	1.189	1.05819	112	1.4722	1.5756	0.7879	40.6558	18.6714	59.3272	1.8171	0.0418	1.07018	0.535182	1.18852	0.6322	2.09097	4.62311
395	Participant_395	20	Male	15	TFMS>14	184	84.2	24.87	19.4	2	0	600	693	1293	3		99	1.2778	1.5357	0.7681	39.837	20.36	60.197	3.0679	0.0853	1.20184	0.601122	2.07026	1.4752	4.10849	12.6336	3.6849	2.07026	2.45406	106	1.5278	1.7135	0.8572	41.3237	17.6783	59.0021	1.969	0.7766	1.12154	0.561058	1.12487	0.7094	2.67982	8.42841
396	Participant_396	20	Male	14	TFMS≤14	162	62	23.6244	25.7	12	1920	2160	693	4773	11		104	1.25	1.4282	0.7143	40.0721	19.3067	59.3788	2.1534	1.3611	1.14255	0.571471	1.47931	0.8592	2.62951	8.1034	1.95524	1.47928	1.50344	116	1.5	1.55	0.775	41.1036	16.7572	57.8608	2.2103	2.4884	1.03333	0.516667	0.998419	0.5158	1.939	6.53331
397	Participant_397	20	Male	14	TFMS≤14	183	73.4	21.9176	12.3	15	0	0	1386	1386	55		115	1.1667	1.2166	0.6077	38.8795	22.5942	61.4738	4.7157	0.9129	1.04281	0.520877	2.87273	1.4634	3.9751	7.68914	3.3751	2.87266	2.80942	120	1.3889	1.3748	0.6879	40.2226	19.8801	60.1027	3.3429	0.8121	0.989831	0.495254	2.44997	1.0831	3.21958	6.77009
398	Participant_398	20	Female	15	TFMS>14	152	84.6	36.617	28	10	320	240	495	1055	6		108	1.0278	1.1422	0.5709	38.9304	23.2937	62.2241	3.8232	3.0104	1.11132	0.555472	1.62143	0.938	3.23963	6.22185	2.38573	1.62137	1.68866	113	1.2222	1.2991	0.65	40.0202	20.6149	60.6351	2.5717	1.6508	1.06286	0.531786	1.50566	0.7035	2.49724	8.05873
399	Participant_399	21	Male	14	TFMS≤14	173	68.5	22.8875	21.8	4	320	120	990	1430	8		110	1.3611	1.4692	0.7344	39.6981	19.9005	59.5986	3.7396	1.6821	1.07944	0.539537	1.60873	0.8989	2.58375	8.95455	2.56298	1.6087	1.66608	121	1.6389	1.6151	0.8074	41.4003	16.3031	57.7034	2.8066	2.1419	0.9855	0.492667	1.17791	0.5878	1.80747	7.07105
400	Participant_400	20	Male	17	TFMS>14	167	66	23.6652	25.9	5	0	0	693	693	0		105	1.1111	1.2575	0.6284	40.3059	19.8471	60.1529	3.5805	1.1448	1.13173	0.565577	1.87213	1.0127	3.64612	11.7942	2.91324	1.87217	1.79053	113	1.3333	1.4124	0.7063	41.0991	17.6669	58.766	2.9573	0.3276	1.05929	0.529732	1.3333	0.7701	2.87038	6.11822
401	Participant_401	20	Female	15	TFMS>14	164	47.4	17.6234	21.3	8	0	0	2079	2079	16		100	1.0278	1.2166	0.6079	38.5862	22.7586	61.3448	3.7459	0.0874	1.18367	0.591429	3.15039	1.8098	4.54618	9.61878	3.86618	3.15042	3.06011	105	1.2222	1.3879	0.694	39.6105	20.4742	60.0847	2.4223	0.7666	1.13558	0.567788	2.66103	1.482	3.78662	7.71508
402	Participant_402	20	Female	12	TFMS≤14	164	58.4	21.7133	33.6	0	0	120	297	417	10		110	1.1111	1.2107	0.6054	38.6302	22.3148	60.9449	3.7811	1.0939	1.08963	0.544815	1.7392	1.0539	3.12191	6.14839	2.17672	1.73917	1.93447	116	1.3333	1.3766	0.6884	40.2209	18.8955	59.1164	3.2719	1.6342	1.03246	0.516316	1.33669	0.7226	1.86893	5.34995
403	Participant_403	20	Female	14	TFMS≤14	160	46.4	18.125	24.9	1	0	120	198	318	29		104	1.0833	1.2424	0.6213	38.9981	21.4909	60.489	4.9926	1.3066	1.14686	0.573529	2.90217	1.6841	5.30334	11.6491	3.84533	2.90216	2.9364	111	1.3056	1.401	0.7005	40.0712	18.9427	59.0139	4.5918	2.2576	1.07309	0.536545	2.56833	1.2823	4.22972	5.51875
404	Participant_404	26	Male	15	TFMS>14	170	68.4	23.6678	21.3	9	240	120	4158	4518	3		92	1	1.292	0.6458	36.0165	26.419	62.4355	5.1077	4.2082	1.292	0.645778	1.92794	1.2515	5.02159	5.84201	3.22108	1.92792	1.93793	100	1.1944	1.4241	0.7122	38.052	23.6905	61.7426	2.7995	0.5384	1.19224	0.596224	1.66248	0.7391	3.03585	4.78842
405	Participant_405	21	Male	19	TFMS>14	168	65.8	23.3135	13.6	18	6720	0	2079	8799	4		118	1.3889	1.4016	0.7004	40.0478	20.2631	60.311	2.1768	0.8999	1.00914	0.50431	1.44053	0.7903	1.96915	4.21653	1.69903	1.44053	1.56707	125	1.6667	1.5909	0.7954	42.3961	16.4583	58.8543	2.6872	2.9938	0.954516	0.477258	1.0422	0.4809	1.67964	5.04669
406	Participant_406	21	Male	16	TFMS>14	170	69.5	24.0484	20.6	20	240	0	990	1230	28		98	1.1111	1.3574	0.6785	36.3063	27.3192	63.6255	3.3714	0.1877	1.22167	0.610625	2.19977	1.3641	3.7919	7.15211	3.46638	2.19979	2.23389	107	1.3333	1.4906	0.7452	38.1266	23.2236	61.3502	3.2038	1.363	1.11792	0.558868	1.33867	0.8047	2.6092	6.42278
407	Participant_407	20	Female	14	TFMS≤14	161	61.2	23.6102	28.2	10	960	480	693	2133	18		108	1.25	1.384	0.692	39.2468	20.6714	59.9182	3.7438	2.1053	1.10717	0.553585	2.24946	1.2146	3.30422	7.13595	3.02295	2.24949	2.19406	115	1.5	1.5524	0.7762	40.973	17.2911	58.2641	2.1966	1.8447	1.03491	0.517456	1.36791	0.6006	1.76238	6.38016
408	Participant_408	20	Male	15	TFMS>14	172	63	21.2953	23.8	0	0	0	990	990	0		94	0.9722	1.2438	0.6221	37.2302	25.9983	63.2285	5.151	1.24	1.27935	0.639891	3.51604	2.3625	7.09236	6.73121	4.88277	3.5161	3.69204	101	1.1667	1.3753	0.6868	37.8012	23.736	61.5372	4.066	1.7353	1.1788	0.5887	2.90237	1.8863	4.70726	7.07449
409	Participant_409	20	Male	18	TFMS>14	166	69.9	25.3665	22.5	7	0	0	3465	3465	3		96	1.1111	1.3771	0.6878	39.6395	21.6824	61.3219	3.0278	2.4552	1.23936	0.619043	1.75673	1.05	2.78384	5.83515	2.33065	1.75679	1.6962	101	1.3333	1.5677	0.7839	40.7892	18.4725	59.2618	3.3444	0.1252	1.1758	0.5879	1.40355	0.6935	3.21384	6.49993
410	Participant_410	22	Female	15	TFMS>14	153	53.5	22.8545	37	20	0	120	396	516	80		100	1.0278	1.2193	0.6095	37.8978	22.226	60.1239	5.5168	5.0885	1.18633	0.593061	1.8318	0.9627	3.87938	9.389	2.13542	1.83175	1.62319	111	1.2222	1.3136	0.6566	39.5703	19.6921	59.2624	3.0882	2.9073	1.07473	0.537182	1.4722	0.6926	2.45032	8.3729
411	Participant_411	26	Male	9	TFMS≤14	175	60.3	19.6898	13.1	16	0	360	396	756	30		92	1	1.2929	0.6463	40.5466	19.9725	60.5191	3.8429	2.6634	1.29289	0.646333	2.28641	1.4959	4.48743	9.21968	3.73816	2.28646	2.31447	102	1.1944	1.3987	0.6988	41.4005	18.2067	59.6072	3.7116	2.4641	1.171	0.585	2.2415	1.3491	4.76371	13.1561
412	Participant_412	22	Female	15	TFMS>14	156	51.1	20.9977	37.7	9	0	0	2376	2376	31		104	0.8889	1.0107	0.5052	37.8514	24.3318	62.1831	5.1512	0.0893	1.13706	0.568333	1.96504	1.2935	5.56043	7.48897	2.70781	1.96494	2.27599	110	1.0556	1.1427	0.5711	39.651	21.3137	60.9648	3.6661	1.4942	1.08259	0.541019	1.48941	0.7899	3.81705	8.21866
413	Participant_413	25	Female	16	TFMS>14	165	78.2	28.7236	34.6	1	0	0	1386	1386	40		99	1.1111	1.3363	0.6684	36.6537	26.5909	63.2445	1.8879	0.2774	1.20265	0.601531	2.30194	1.371	3.25315	4.58954	2.774	2.30196	2.27918	106	1.3333	1.5003	0.7501	38.2841	22.7141	60.9981	2.2636	1.909	1.12519	0.562596	0.844699	0.5234	1.90627	4.43733
414	Participant_414	26	Male	12	TFMS≤14	171	75.3	25.7515	25.8	9	1920	0	297	2217	5		94	0.9722	1.2356	0.6179	39.0866	20.1334	59.22	5.7618	4.2414	1.27087	0.635543	2.88316	1.6915	5.11838	7.43789	4.51503	2.88332	2.6615	102	1.1667	1.3725	0.6864	39.9694	19.6872	59.6566	3.1211	0.9314	1.1764	0.5883	2.10125	1.0325	3.82693	6.61191
415	Participant_415	25	Male	12	TFMS≤14	176	87	28.0863	24.1	15	0	0	990	990	19		104	1.1944	1.3741	0.6868	39.6114	21.6124	61.2238	3.0269	2.131	1.15039	0.575	2.25068	1.3284	4.3081	5.57504	3.00406	2.25078	2.3103	111	1.4444	1.552	0.776	40.7618	19.1313	59.8931	2.982	1.6322	1.07444	0.537222	1.3719	0.7307	2.0242	6.41514
416	Participant_416	24	Male	20	TFMS>14	169	67.6	23.6686	25.5	7	0	0	495	495	13		92	0.9167	1.1982	0.5987	37.1472	26.4366	63.5838	4.2075	1.9876	1.30711	0.653111	2.11915	1.4464	6.38433	4.61935	3.62026	2.11907	2.21465	102	1.1111	1.3024	0.6518	38.5429	23.9379	62.4808	3.3662	2.692	1.1722	0.5866	2.05661	1.0744	4.07572	4.37423
417	Participant_417	24	Female	14	TFMS≤14	166	52.3	18.9795	24.6	12	960	360	495	1815	39		110	1.1667	1.2764	0.6383	40.3859	19.7698	60.1557	2.6628	1.3502	1.09407	0.54713	1.96293	1.1531	3.33829	5.70112	2.67805	1.96286	2.10754	118	1.3889	1.4095	0.7046	41.4373	17.5331	58.9704	2.4373	0.9889	1.01483	0.507328	2.05591	1.018	3.15054	5.05273
418	Participant_418	20	Female	15	TFMS>14	151	43	18.8588	27.2	12	0	0	1386	1386	28		109	0.75	0.8206	0.4101	36.6114	26.7095	63.3209	5.0406	0.1848	1.09407	0.546852	2.72782	1.4475	5.21477	6.97355	3.25106	2.72802	2.64702	112	0.8889	0.9474	0.4736	38.0246	23.1832	61.2078	5.0864	2.2238	1.06582	0.532818	2.45766	1.1551	4.42503	6.35417
419	Participant_419	20	Female	16	TFMS>14	170	50.3	17.4048	26.9	12	0	0	396	396	23		86	0.9444	1.3054	0.6519	39.1042	22.8768	61.9811	2.9794	2.8146	1.38214	0.690238	2.62058	1.8991	6.28756	8.09117	4.37859	2.62076	2.75137	101	1.1389	1.3504	0.6752	40.7401	20.9983	61.7384	2.9091	6.236	1.18571	0.592857	2.06586	1.3814	3.68458	11.2304
420	Participant_420	23	Female	14	TFMS≤14	161	46.4	17.9005	17.8	12	0	360	693	1053	15		102	1.0833	1.2675	0.6333	40.1538	20.3248	60.4786	2.5873	1.5877	1.17	0.5846	1.48038	0.8709	2.46477	6.08911	2.2565	1.48038	1.48967	109	1.3056	1.4349	0.7173	41.3906	17.7682	59.1588	2.1154	1.3115	1.09906	0.549434	1.12153	0.6775	2.23239	5.53179
421	Participant_421	20	Female	15	TFMS>14	161	54.6	21.064	28.7	6	0	0	495	495	2		109	1.0278	1.1271	0.5638	36.8119	24.9747	61.7866	4.5146	3.7367	1.09667	0.548519	2.03909	1.1123	2.57688	7.24573	2.64183	2.03896	2.0279	112	1.2222	1.2969	0.6482	38.4681	22.1042	60.5723	3.5996	2.4638	1.06109	0.530364	1.99855	0.9993	2.22184	4.8665
422	Participant_422	21	Female	15	TFMS>14	171	66.5	22.742	29.2	5	480	120	99	699	39		97	1.0278	1.2677	0.6337	38.6407	22.2529	60.8936	3.0052	1.1305	1.2334	0.616596	2.15662	1.3051	3.85992	7.34646	3.62074	2.15664	2.1166	108	1.3889	1.5377	0.7689	40.4567	18.3027	58.7594	3.2559	1.9251	1.10717	0.553585	1.4402	0.6543	2.4651	6.01824
423	Participant_423	23	Female	18	TFMS>14	170	53.3	18.4429	28.7	2	1920	480	693	3093	9		109	1.1111	1.2197	0.6097	37.934	24.768	62.702	2.9085	1.6589	1.09774	0.548774	1.53907	0.7642	2.66568	4.44081	1.85209	1.53907	1.39258	112	1.3333	1.4175	0.7087	39.5245	21.0877	60.6123	2.1598	0.3468	1.06309	0.531545	0.980387	0.5945	2.01774	5.62508
424	Participant_424	22	Female	15	TFMS>14	160	72.9	28.4766	39.4	13	0	0	792	792	13		105	1.1111	1.2621	0.631	38.6674	23.5284	62.1958	3.4768	2.3927	1.13588	0.567941	1.48111	0.9084	3.4295	6.57801	2.48313	1.48113	1.59953	113	1.3333	1.4081	0.704	39.8546	20.257	60.1116	2.5542	0.0848	1.05607	0.528036	1.48291	0.7114	2.85588	5.72642
425	Participant_425	22	Female	15	TFMS>14	168	56.6	20.0539	24.2	7	480	360	1485	2325	19		87	0.7778	1.0626	0.5311	37.5218	26.1764	63.6982	7.5946	3.3053	1.36619	0.682857	2.94511	2.2311	5.96107	10.8311	3.9133	2.94502	3.26733	93	0.9444	1.2181	0.6092	37.6637	24.2764	61.94	3.6348	1.0467	1.28978	0.645	1.5548	1.0111	3.23919	5.68289
426	Participant_426	20	Female	11	TFMS≤14	157	52.1	21.1368	35.9	7	0	0	3960	3960	30		87	0.8056	1.109	0.5542	35.7143	26.8419	62.5562	3.5852	4.852	1.37667	0.687976	1.93279	1.427	4.56904	8.48599	2.79509	1.93271	2.07424	97	0.9722	1.1969	0.5983	37.0722	24.1618	61.234	3.0765	4.5544	1.23106	0.615426	1.21101	0.8044	3.44922	4.47442
427	Participant_427	22	Female	14	TFMS≤14	148	48.3	22.0508	35.5	8	0	360	396	756	6		105	1	1.1331	0.5666	39.664	20.5363	60.2003	4.1161	0.3417	1.13308	0.566635	2.37022	1.2962	3.99909	7.93911	2.80879	2.37027	2.28745	114	1.1944	1.2537	0.627	40.6431	18.0674	58.7104	3.2006	1.5781	1.04964	0.524911	1.57948	0.7989	3.02339	9.64168
428	Participant_428	21	Female	14	TFMS≤14	154	51.2	21.5888	35.1	0	0	120	495	615	2		97	1	1.2326	0.6163	39.0644	22.2855	61.3499	3.4722	1.0863	1.23255	0.616277	1.69406	0.9918	3.25437	7.79161	2.52861	1.69416	1.60937	104	1.1944	1.372	0.6866	40.099	19.1362	59.2352	3.1866	1.6467	1.14863	0.574804	1.5031	0.9598	3.21629	8.31043
429	Participant_429	26	Male	12	TFMS≤14	178	68.6	21.6513	14	6	720	360	1386	2466	22		112	1.25	1.3286	0.6644	38.6418	22.0835	60.7253	2.72	1.6246	1.06291	0.531545	1.10116	0.6933	2.3591	3.74941	1.59555	1.10116	1.30431	117	1.5	1.5266	0.7631	39.9119	20.0407	59.9526	2.0167	0.339	1.01776	0.508707	1.12544	0.5537	1.85108	3.33322
430	Participant_430	22	Female	12	TFMS≤14	155	61.9	25.7648	40.7	7	0	120	594	714	4		95	0.7222	0.9034	0.4517	36.0445	27.9284	63.9729	4.1324	0.1887	1.25087	0.625435	3.37453	2.1132	7.17474	7.95069	5.01243	3.37461	3.37872	104	0.8611	0.9925	0.4967	37.0194	26.0803	63.0997	3.8891	0.3222	1.15255	0.576765	2.53003	1.5713	5.80263	7.83273
431	Participant_431	27	Male	18	TFMS>14	174	71.6	23.6491	22	20	720	1440	1386	3546	5		104	1.25	1.4353	0.7173	38.4563	22.0116	60.4679	2.9751	2.7591	1.14824	0.573824	1.64251	0.9579	3.79704	5.47802	2.43435	1.64254	1.66929	110	1.5	1.6308	0.8153	39.1586	20.5246	59.6832	2.6466	2.9149	1.08722	0.543519	1.12537	0.5903	2.58206	4.76501
432	Participant_432	20	Female	18	TFMS>14	164	61.5	22.8659	33.6	11	480	360	594	1434	17		102	0.8889	1.0316	0.5165	38.6869	24.1255	62.8123	5.7584	3.8749	1.1606	0.5811	2.72159	1.5274	6.42078	14.7135	4.59496	2.72147	2.62843	106	1.0556	1.1879	0.5939	39.2857	22.1975	61.4833	3.9153	1.9768	1.12538	0.562596	1.83164	1.1498	2.7944	6.40117
433	Participant_433	26	Male	15	TFMS>14	165	69.5	25.528	26.6	6	240	0	396	636	24		104	1.1111	1.2682	0.6341	38.6703	23.5698	62.2402	1.9994	2.3811	1.14137	0.570686	1.2023	0.6264	2.04963	4.38612	1.52458	1.2023	1.09759	117	1.3333	1.3612	0.6803	39.4359	21.77	61.2059	2.9573	1.6408	1.02086	0.510259	0.984303	0.495	1.60108	4.26872
434	Participant_434	22	Male	16	TFMS>14	175	75.2	24.5551	14.2	8	6720	3360	693	10773	25		99	1.1111	1.3391	0.6693	37.9602	24.2178	62.178	3.1585	0.4026	1.20521	0.602396	2.09492	1.141	3.66674	8.54	3.08678	2.0949	1.89417	106	1.3333	1.489	0.7444	39.1596	21.4913	60.6509	3.5411	0.4732	1.11673	0.558269	1.85614	1.1046	3.00973	4.18169
435	Participant_435	24	Male	18	TFMS>14	167	57	20.4382	11	9	0	0	2772	2772	19		98	1.1944	1.4463	0.7235	40.8809	18.7027	59.5836	3.008	1.1429	1.21083	0.605729	1.39855	0.6846	2.99578	6.59263	2.39781	1.39865	1.13017	107	1.4444	1.6208	0.8108	42.485	15.647	58.132	2.1681	1.4762	1.12212	0.561346	1.44476	0.8033	2.10121	6.68115
436	Participant_436	23	Female	17	TFMS>14	158	55.5	22.232	33.7	8	0	360	1386	1746	43		103	1.0556	1.2263	0.6134	38.0961	22.6545	60.7506	4.4608	3.0987	1.1618	0.5811	1.79486	1.324	4.54088	7.86864	2.96458	1.79471	2.27839	111	1.2778	1.3774	0.6888	39.4164	19.6829	59.0993	2.4766	3.6964	1.078	0.539091	1.13828	0.6259	3.05482	7.29466
437	Participant_437	24	Female	13	TFMS≤14	169	77.7	27.2049	35.4	10	200	240	2376	2816	37		83	0.8333	1.1996	0.5997	36.0021	26.207	62.2091	4.9966	4.8492	1.4395	0.719625	2.90988	1.7972	7.65455	7.33926	4.90153	2.91002	2.49738	91	1	1.3155	0.6584	37.9578	23.8943	61.8521	3.9387	0.4883	1.31545	0.658409	2.3623	1.6124	5.25083	10.9424
438	Participant_438	25	Male	18	TFMS>14	165	54.5	20.0184	11.2	2	1920	720	495	3135	5		102	0.9722	1.1396	0.57	37.1097	25.0981	62.2078	2.9214	1.8224	1.1722	0.5863	2.56666	1.5454	4.07791	8.28469	3.49008	2.56662	2.63577	110	1.1667	1.2695	0.6345	38.4786	22.4983	60.9769	2.7183	1.4054	1.08815	0.543889	1.65038	0.848	3.08509	7.44456
439	Participant_439	29	Male	16	TFMS>14	179	77.8	24.2814	8.3	6	640	480	693	1813	9		97	1.1944	1.4697	0.735	39.8409	22.2376	62.0785	6.6659	4.9376	1.23043	0.615319	1.19676	0.9074	2.03786	4.29363	1.80642	1.19678	1.47475	105	1.4444	1.6308	0.8156	40.8619	20.1669	61.0288	1.9864	4.7374	1.12904	0.564615	0.906869	0.5357	1.52	4.19598
[truncated: 21 more columns]
